# Supplementary material
Source: PubMed Central journal article supplement (PMC6596386)
Supplement: MD-010-C9MD00185A-s001.pdf [file MD-010-C9MD00185A-s001.pdf]

Supplementary Information

## A MedChem Toolbox for Cereblon-directed PROTACs

Christian Steinebach,<sup>a</sup> Izidor Sosič,<sup>b</sup> Stefanie Lindner,<sup>c</sup> Aleša Bricelj,<sup>b</sup>  
Franziska Kohl,<sup>a</sup> Yuen Lam Dora Ng,<sup>c</sup> Marius Monschke,<sup>d</sup> Karl G. Wagner,<sup>d</sup>  
Jan Krönke<sup>c</sup> and Michael Gütschow<sup>\*,a</sup>

<sup>a</sup>*Pharmaceutical Institute, Pharmaceutical Chemistry I, University of Bonn,  
An der Immenburg 4, D-53121 Bonn, Germany*

<sup>b</sup>*Faculty of Pharmacy, University of Ljubljana, SI-1000 Ljubljana, Slovenia*

<sup>c</sup>*Department of Internal Medicine III, University Hospital Ulm,  
Albert-Einstein-Allee 23, D-89081 Ulm, Germany*

<sup>d</sup>*Pharmaceutical Institute, Pharmaceutical Technology, University of Bonn,  
Gerhard-Domagk-Straße 3, 53121 Bonn, Germany*

# Table of Content

|                                                                               |    |
|-------------------------------------------------------------------------------|----|
| Supplementary Figures, Schemes, and Tables.....                               | 3  |
| Supplementary Information: Biology.....                                       | 16 |
| <b>A.</b> Cell Lines.....                                                     | 16 |
| <b>B.</b> Immunoblotting.....                                                 | 16 |
| <b>C.</b> Cell Viability Assay.....                                           | 16 |
| <b>D.</b> Statistical Analysis.....                                           | 16 |
| Supplementary Information: Chemistry.....                                     | 17 |
| <b>E.</b> Determination of logP values.....                                   | 17 |
| <b>F.</b> Molecular Descriptor Calculation.....                               | 17 |
| <b>G.</b> Measurements of Absorption and Emission Spectra.....                | 18 |
| <b>H.</b> General Remarks.....                                                | 18 |
| <b>I.</b> Synthesis of the Toolbox Compounds <b>1-5</b> .....                 | 19 |
| <b>J.</b> Synthesis of the Chemical Probes <b>6</b> and <b>7</b> .....        | 68 |
| <b>K.</b> Synthesis of the hydrophobically tagged CRBN Ligands <b>8</b> ..... | 70 |
| <b>L.</b> Synthesis of the VPMLK-tagged CRBN Ligand <b>9</b> .....            | 74 |
| <b>M.</b> Selected $^1\text{H}$ and $^{13}\text{C}$ NMR Spectra.....          | 81 |
| References.....                                                               | 95 |

## Supplementary Figures, Schemes, and Tables

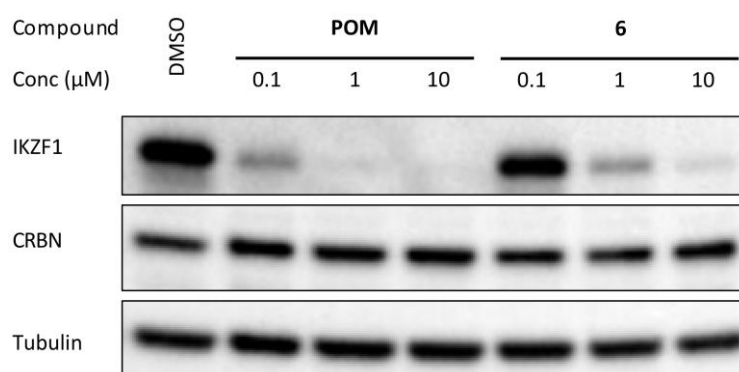

**Figure S1:** Cell permeability and induction of IKZF1 degradation by the biotin labelled pomalidomide analog **6** was shown. The multiple myeloma cell line MM1S was treated either with pomalidomide (**POM**) or compound **6** for 16 h with the indicated concentrations.

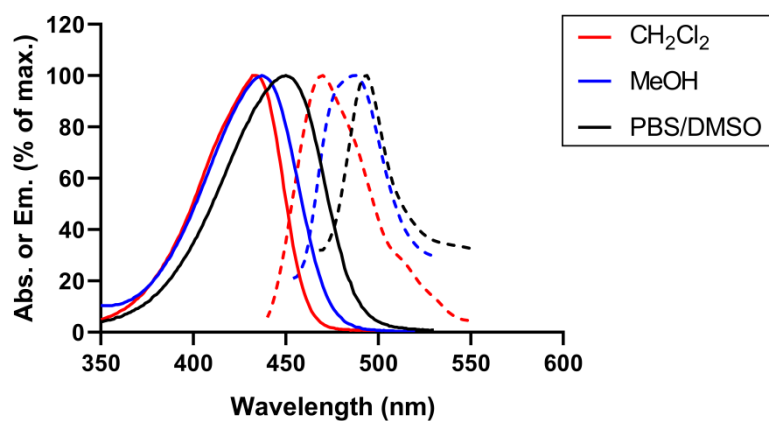

**Figure S2:** Absorption (Abs., solid lines) and emission (Em., dotted lines) spectra of compound **7** were recorded at concentrations of 10 μM and 1 μM, respectively, in the corresponding solvent containing 1% DMSO. Red lines, CH<sub>2</sub>Cl<sub>2</sub>,  $\lambda_{\text{ex}} = 434$  nm,  $\lambda_{\text{em}} = 470$  nm, 36 nm Stokes shift; blue lines, MeOH,  $\lambda_{\text{ex}} = 437$  nm,  $\lambda_{\text{em}} = 488$  nm, 51 nm Stokes shift; black lines, PBS/DMSO,  $\lambda_{\text{ex}} = 450$  nm,  $\lambda_{\text{em}} = 494$  nm, 44 nm Stokes shift.

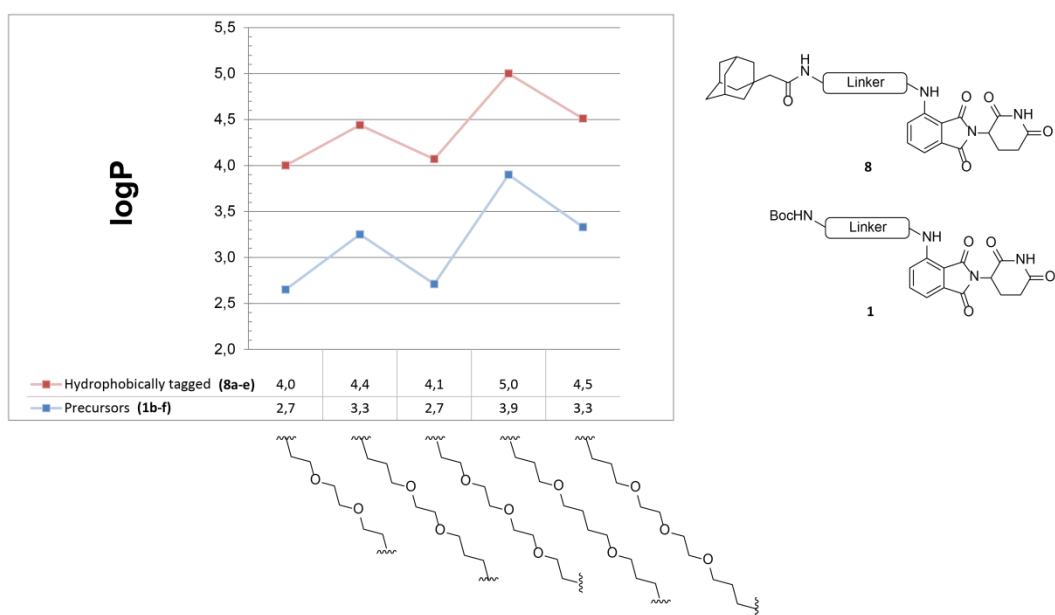

**Figure S3:** Similar trends can be observed in the logP profiles of synthetic products, chimeras **8a-e**, and their precursors, Boc-protected tool compounds **1b-f**. The hydrophobicity of the compounds is largely influenced by the linker length and the C/O ratio.

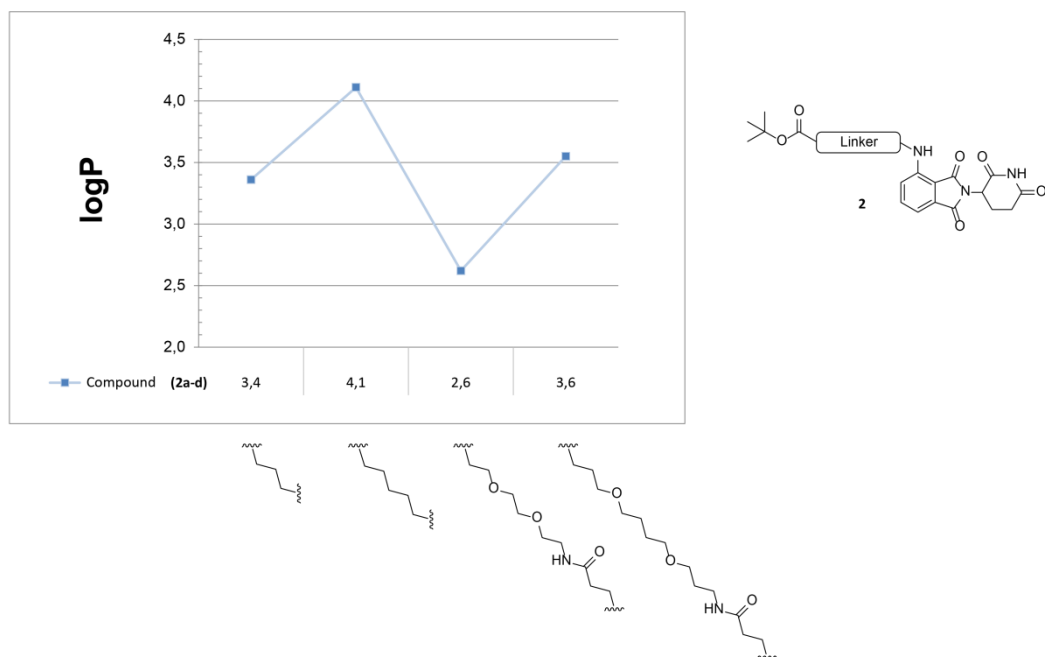

**Figure S4:** logP values of *tert*-butyl protected carboxy tool compounds **2**. The upper terminus of the linker is connected to the pomalidomide nitrogen.

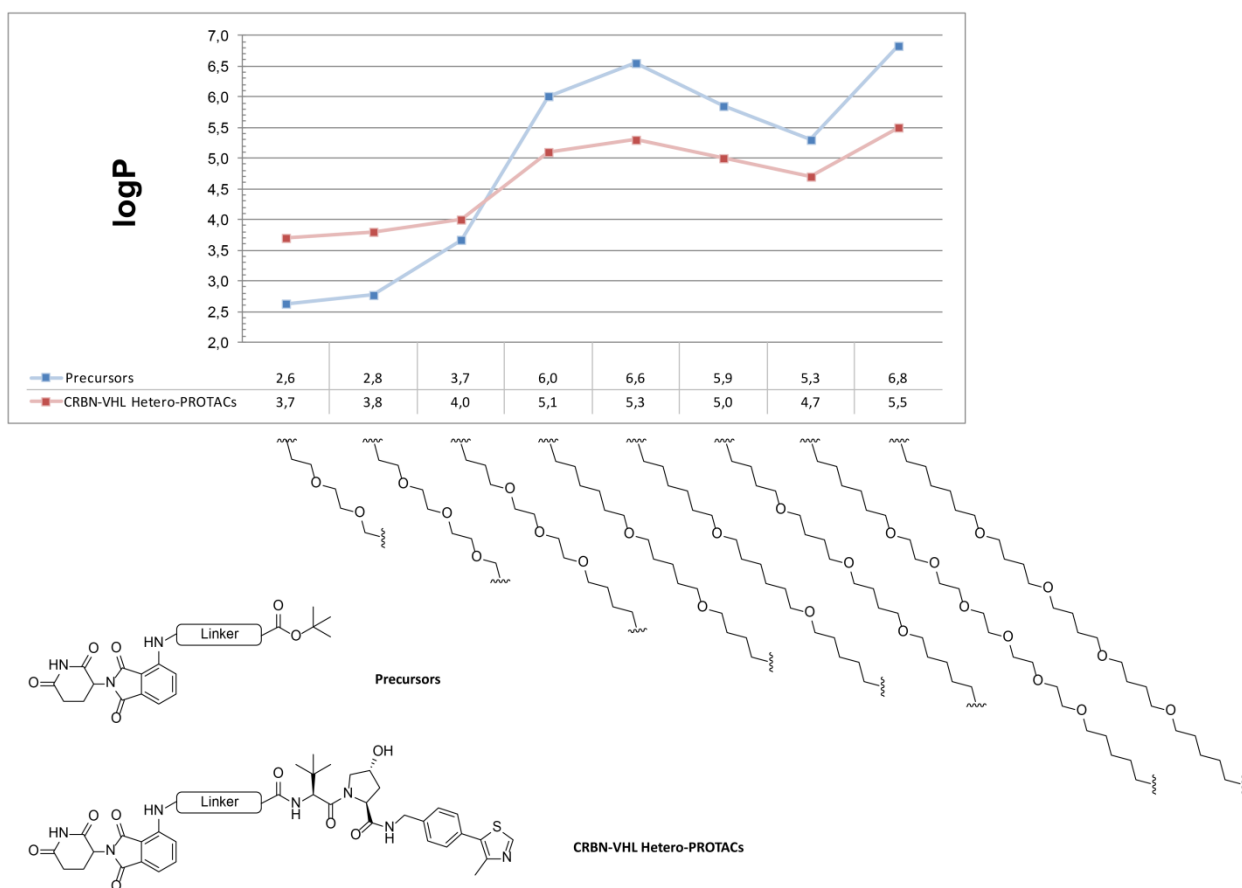

**Figure S5:** Comparison of logP profiles of our comprehensive pomalidomide-based PROTAC precursor library with recently published CRBN-VHL hetero-PROTACs.<sup>1</sup> The upper terminus of the linker is connected to the pomalidomide nitrogen. The hydrophobicity of the compounds is largely influenced by the linker length and the C/O ratio. The determination of logP values is beneficial to estimate logP values of final PROTAC compounds.<sup>2</sup>

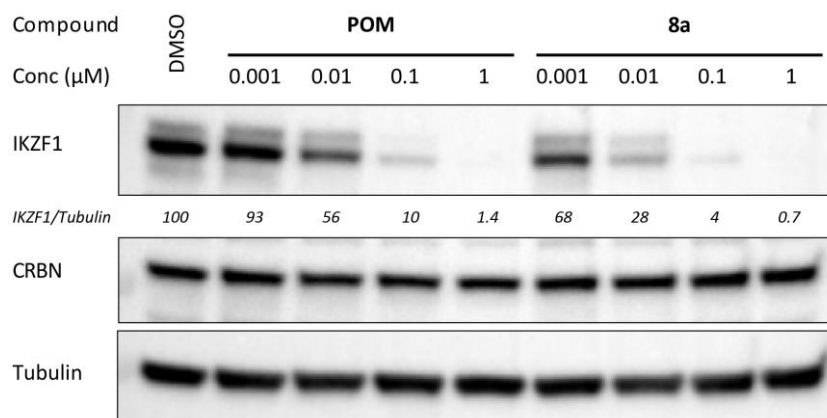

**Figure S6:** Compound **8a** induces degradation of IKZF1, but does not affect CRBN protein level. The multiple myeloma cell line MM1S was treated either with pomalidomide (**POM**) or compound **8a** for 16 h with the indicated concentrations. The quantification was performed with IKZF1 levels normalized to tubulin, then to DMSO control (100%).

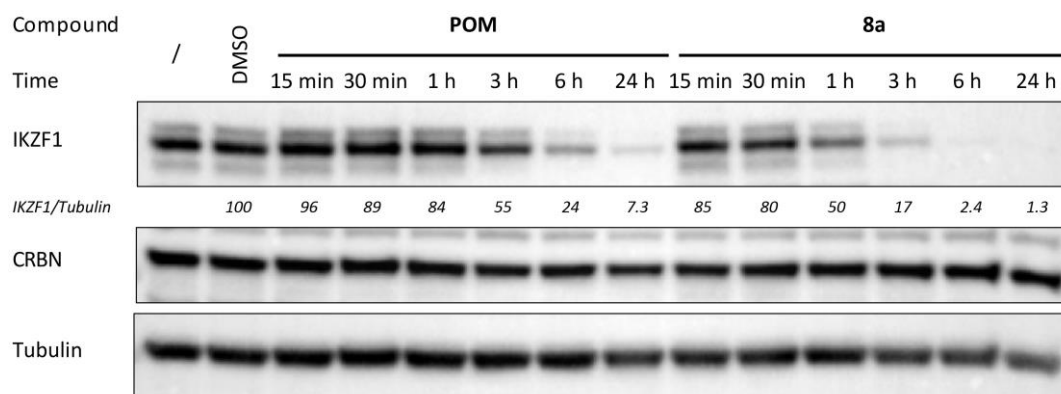

**Figure S7:** Time course experiment with compound **8a**. The multiple myeloma cell line MM1S was treated with 100 nM pomalidomide (**POM**) or compound **8a** for the indicated time period. The quantification was performed with IKZF1 levels normalized to tubulin, then to DMSO control (100%).

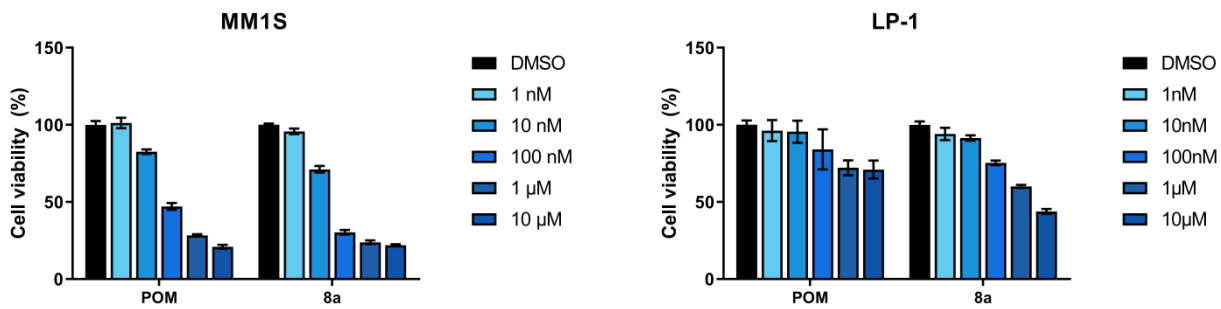

**Figure S8:** Impact of compound **8a** on cell viability. The multiple myeloma cell lines MM1S and LP-1 were treated with the indicated concentrations of compound **8a** or pomalidomide (**POM**). Cell viability was analyzed after 4 days in triplicate. Error bars express the mean  $\pm$  SEM from 3 biological replicates.

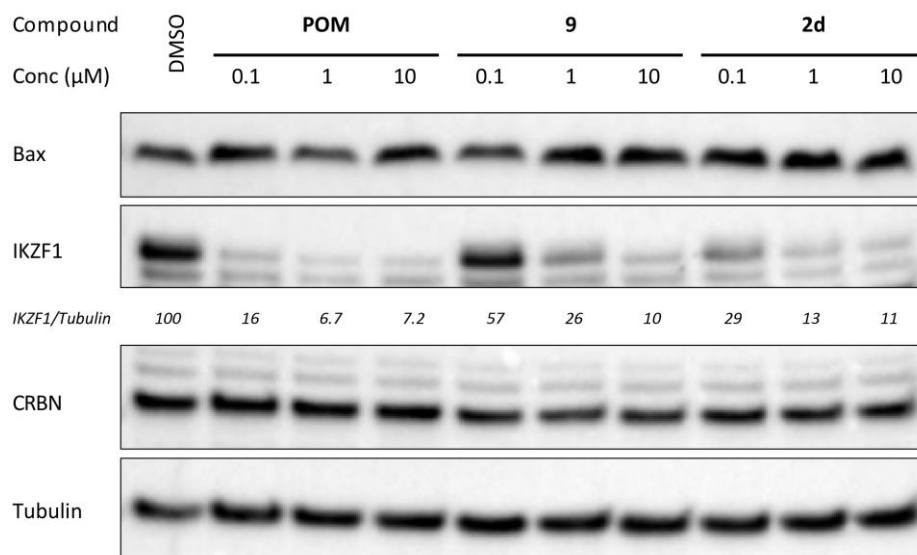

**Figure S9:** Effect of compound **9** on the cellular protein level of the pro-apoptotic protein Bax, IKZF1, and CRBN. The multiple myeloma cell line MM1S was treated either with pomalidomide (**POM**), compound **9** or **2d** for 16 h with the indicated concentrations. The quantification was performed with IKZF1 levels normalized to tubulin, then to DMSO control (100%).

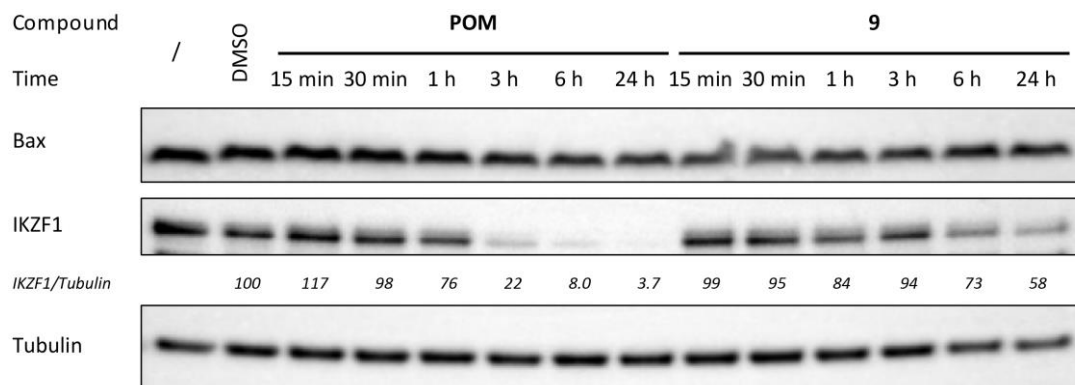

**Figure S10:** Time course experiment with compound **9**. The multiple myeloma cell line MM1S was treated with 1 μM pomalidomide (**POM**) or compound **9** for the indicated time period. The quantification was performed with IKZF1 levels normalized to tubulin, then to DMSO control (100%).



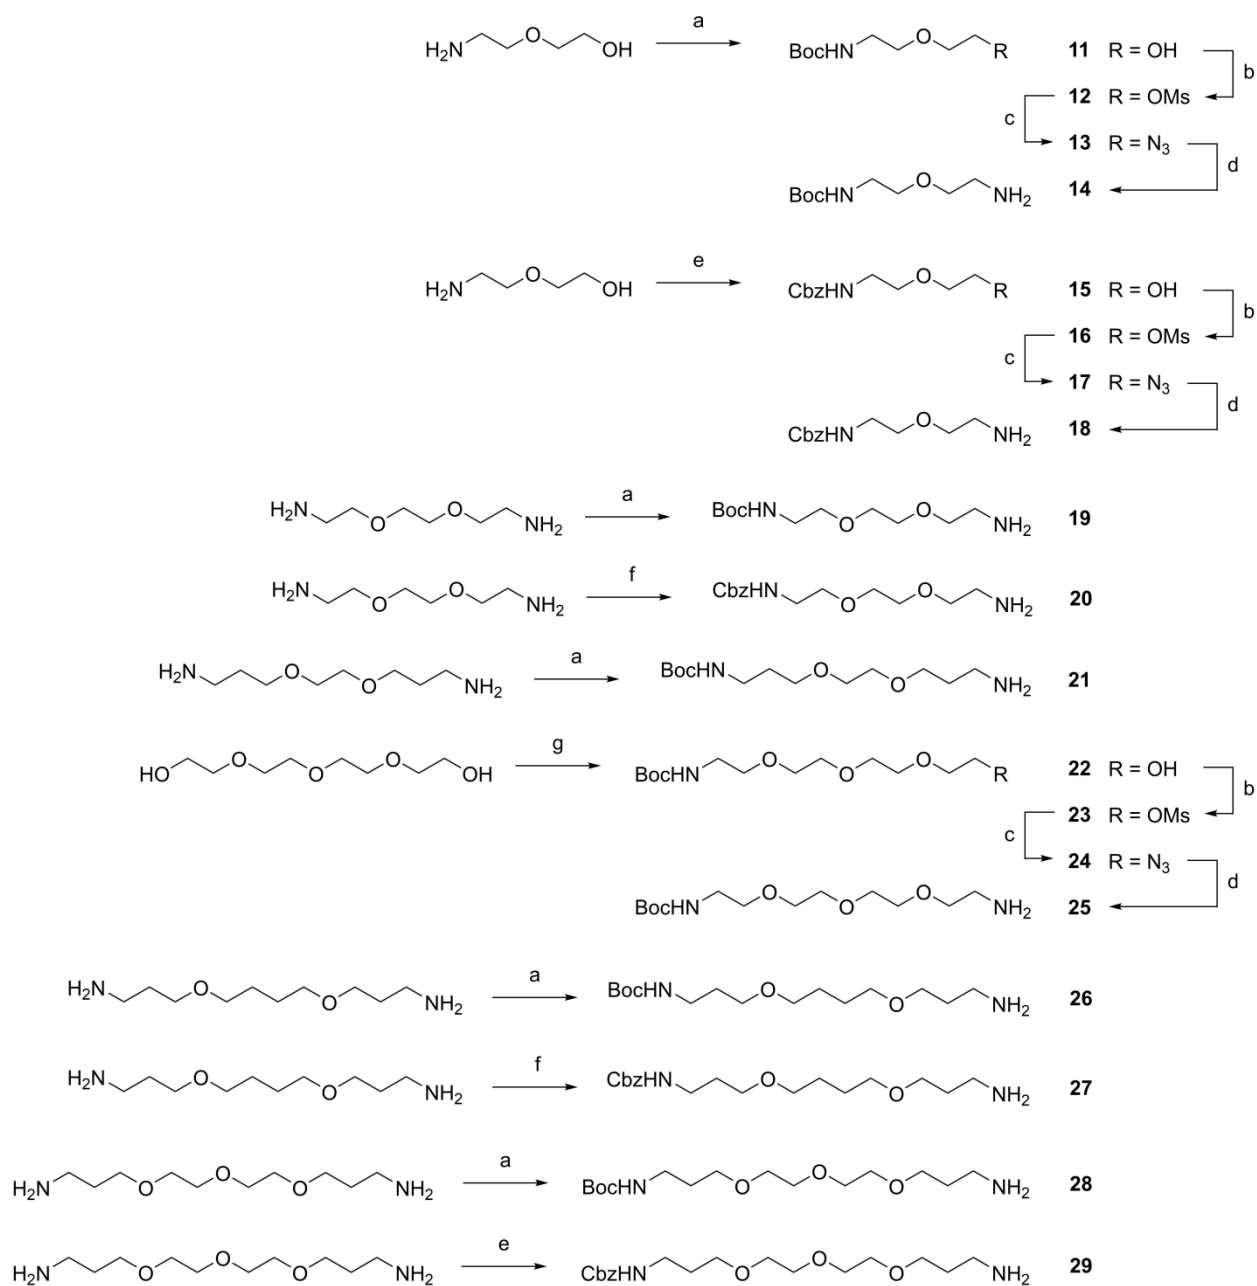

**Scheme S1:** Synthesis of carbamate-protected amine linkers. *Reagents and conditions:* (a) (Boc)<sub>2</sub>O, CH<sub>2</sub>Cl<sub>2</sub>, rt, 18 h; (b) MsCl, Et<sub>3</sub>N, CH<sub>2</sub>Cl<sub>2</sub>, rt, 3 h; (c) NaN<sub>3</sub>, DMF, 70 °C, 24 h; (d) PPh<sub>3</sub>, H<sub>2</sub>O, THF, rt, 24 h; (e) Cbz-Cl, Et<sub>3</sub>N, CH<sub>2</sub>Cl<sub>2</sub>, rt, 24 h; (f) Cbz-Cl, Et<sub>3</sub>N, CHCl<sub>3</sub>, rt, 24 h; (g) (i) MsCl, Et<sub>3</sub>N, THF, rt, 18 h; (ii) NaN<sub>3</sub>, EtOH, reflux, 6 h; (iii) PPh<sub>3</sub>, H<sub>2</sub>O, THF, rt, 2 h; (iv) Boc<sub>2</sub>O, rt, 18 h.

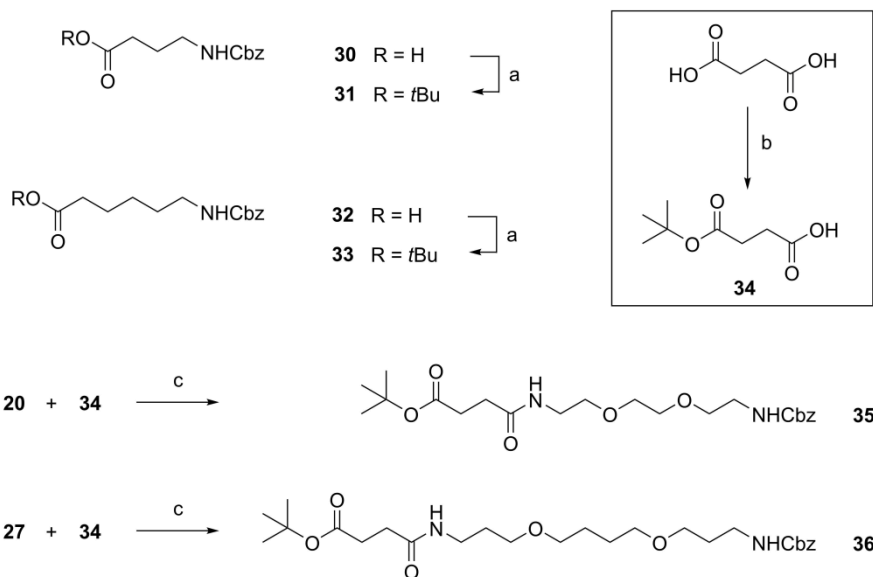

**Scheme S2:** Synthesis of protected carboxy linkers. *Reagents and conditions:* (a) **30** or **32**, *t*BuOH, DCC, DMAP, CH<sub>2</sub>Cl<sub>2</sub>, rt, 18 h; (b) NHS, DMAP, toluene, Et<sub>3</sub>N, *t*BuOH, reflux, 24 h; (c) (i) **34**, NHS, DCC, DMF, rt, 3 h (ii) **20** or **27**, DIPEA, DMF, rt, 3 h.

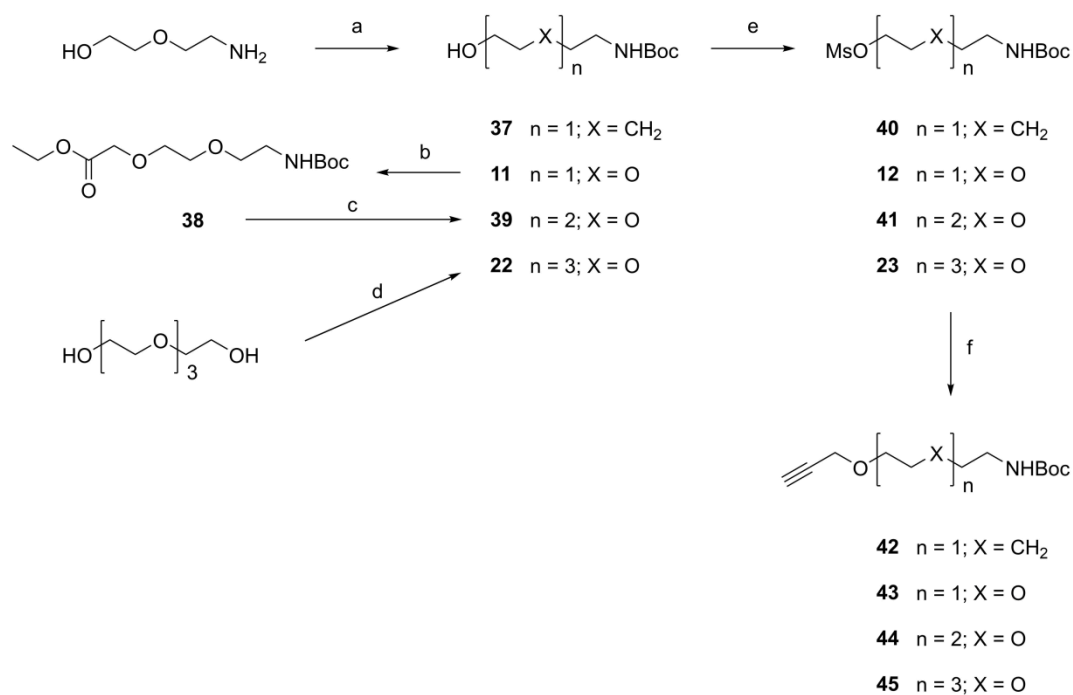

**Scheme S3:** Synthesis of alkyne linkers. *Reagents and conditions:* (a) (Boc)<sub>2</sub>O, CH<sub>2</sub>Cl<sub>2</sub>, rt, 18 h; (b) ethyl bromoacetate, KO<sup>t</sup>Bu, *t*BuOH, rt, 18 h; (c) NaBH<sub>4</sub>, THF, MeOH, reflux, 2 h; (d) (i) MsCl, Et<sub>3</sub>N, THF, rt, 18 h; (ii) NaN<sub>3</sub>, EtOH, reflux, 6 h; (iii) PPh<sub>3</sub>, H<sub>2</sub>O, THF, rt, 2 h; (iv) Boc<sub>2</sub>O, rt, 18 h; (e) MsCl, Et<sub>3</sub>N, CH<sub>2</sub>Cl<sub>2</sub>, rt, 3 h; (f) propargyl alcohol, NaH, THF, rt, 18 h.

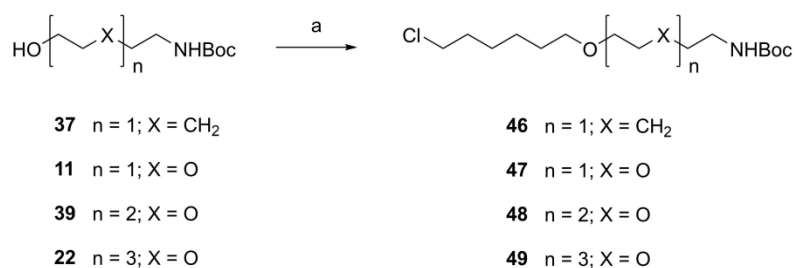

**Scheme S4:** Synthesis of chloro linkers. *Reagents and conditions:* (a) 1-chloro-6-iodohexane, KO<sup>t</sup>Bu, THF, rt, 18 h.

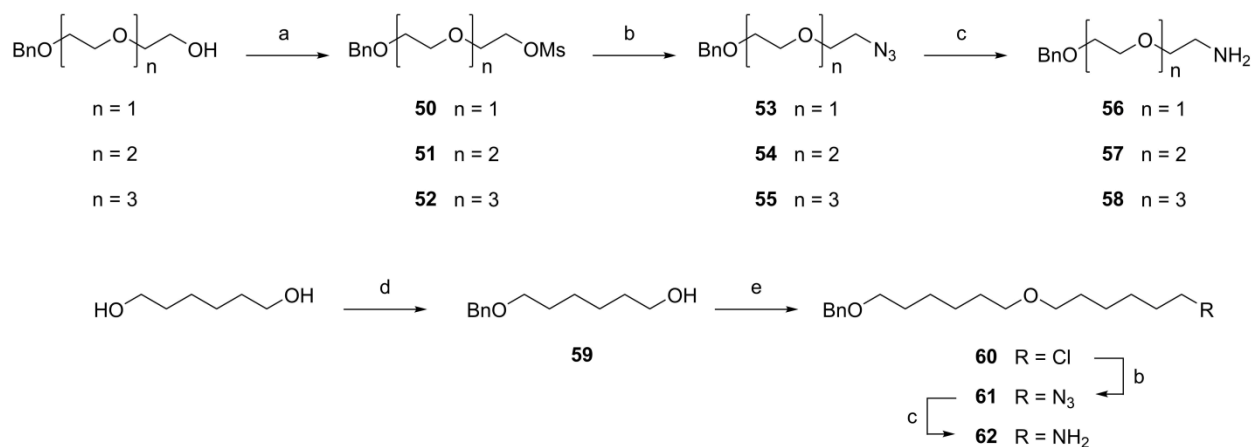

**Scheme S5:** Synthesis of benzyl-protected hydroxy linkers. *Reagents and conditions:* (a) MsCl, Et<sub>3</sub>N, CH<sub>2</sub>Cl<sub>2</sub>, rt, 3 h; (b) NaN<sub>3</sub>, DMF, 70 °C, 24 h; (c) PPh<sub>3</sub>, H<sub>2</sub>O, THF, rt, 24 h; (d) benzyl bromide, NaH, THF, rt, 24 h; (e) 1-bromo-6-chlorohexane, 50% NaOH, DMSO, rt, 24 h.

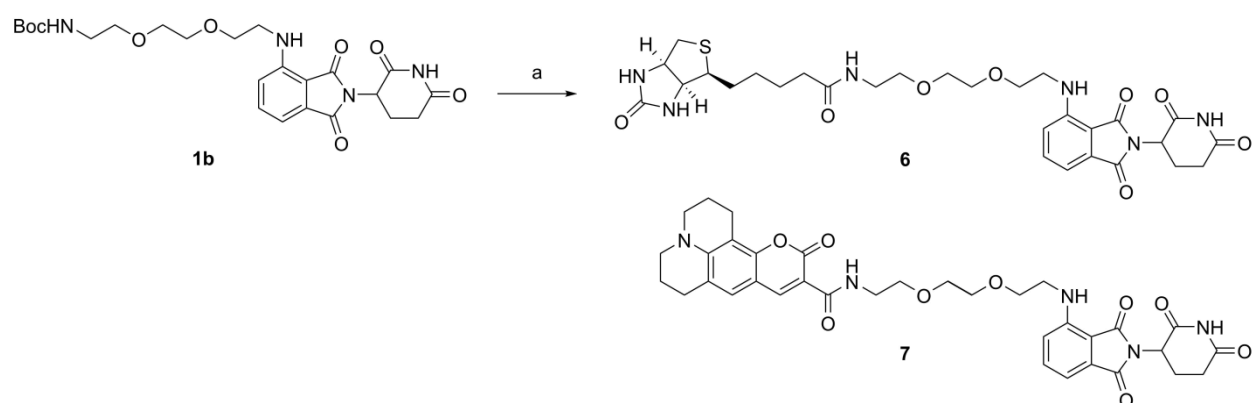

**Scheme S6:** Synthesis of the CRBN-addressing probes **6** and **7** with a biotin and fluorescent tag, respectively. *Reagents and conditions:* (a) (i) TFA, CH<sub>2</sub>Cl<sub>2</sub>, rt, 2 h; (ii) coumarin 343 or (+)-biotin, HATU, DIPEA, DMF, rt, 18 h.

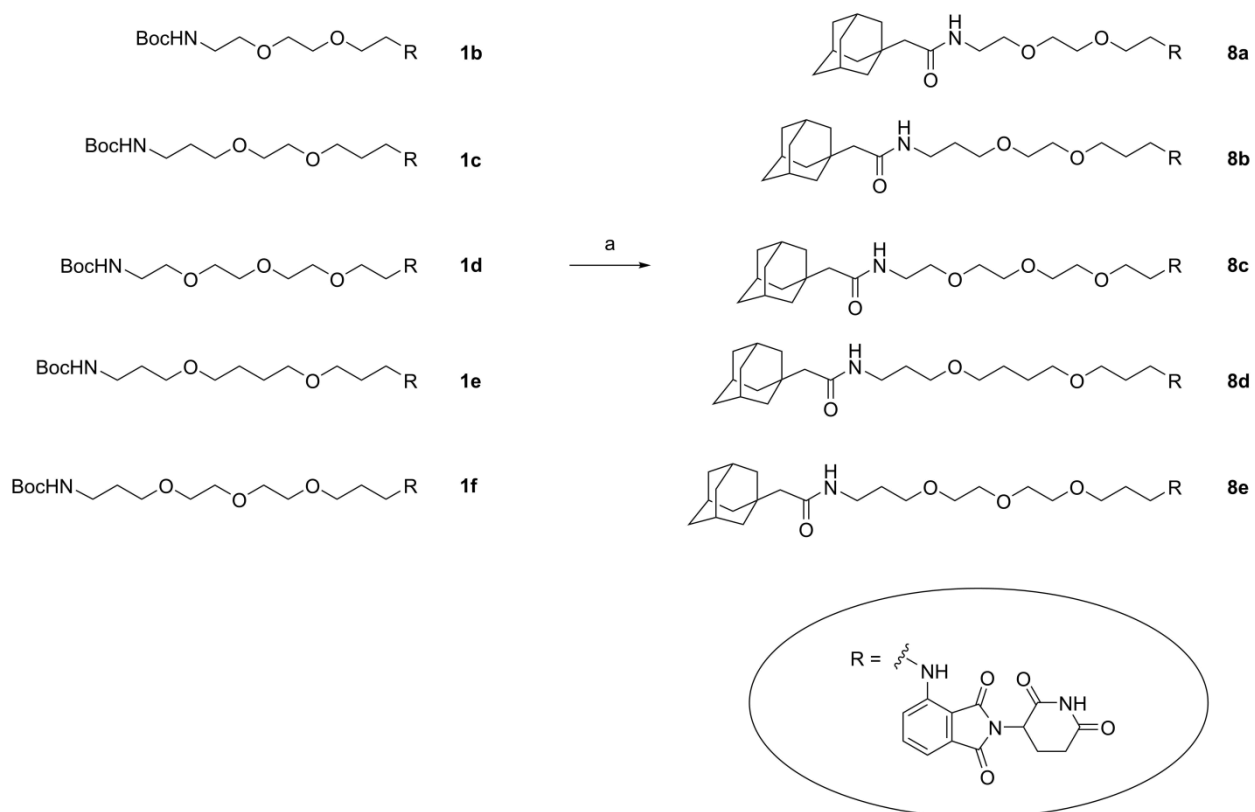

**Scheme S7:** Synthesis of the CRBN-addressing hydrophobically tagged compounds **8**. *Reagents and conditions:* (a) (i) TFA, CH<sub>2</sub>Cl<sub>2</sub>, rt, 2 h; (ii) 1-adamantaneacetic acid, HATU, DIPEA, DMF, rt, 18 h.

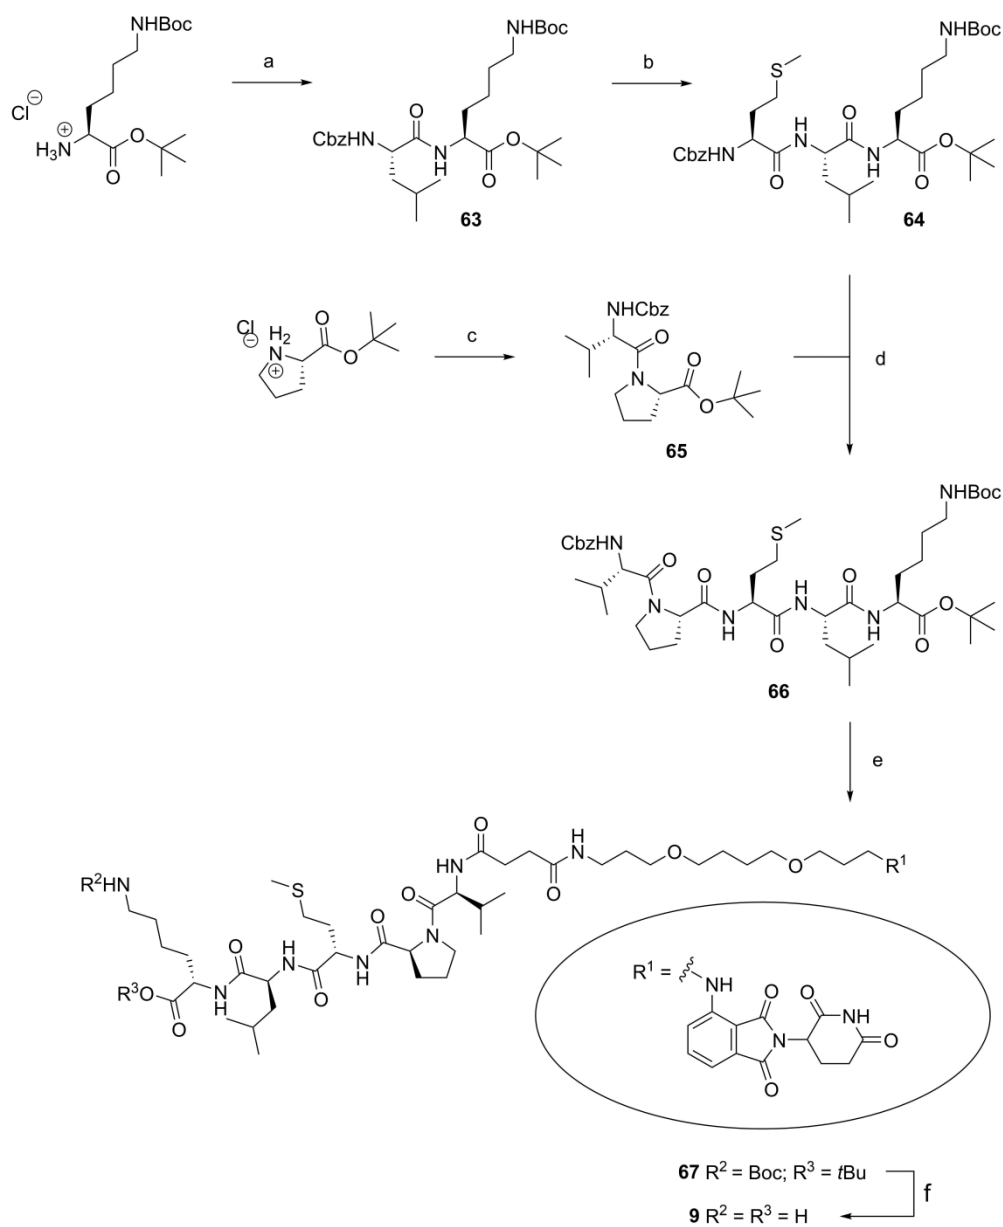

**Scheme S8:** Synthesis of the VPMLK-tagged CRBN ligand **9**. *Reagents and conditions:* (a) Cbz-Leu-OH, isobutyl chloroformate, NMM, Et<sub>3</sub>N, rt, 18 h; (b) (i) Pd/C, H<sub>2</sub>, MeOH, rt, 24 h; (ii) Cbz-Met-OH, isobutyl chloroformate, NMM, Et<sub>3</sub>N, rt, 18 h; (c) Cbz-Val-OH, isobutyl chloroformate, NMM, Et<sub>3</sub>N, rt, 18 h; (d) (i) **64**, Pd(OH)<sub>2</sub>/C, H<sub>2</sub> (60 psi), MeOH, rt, 5 h; (ii) **65**, TFA, CH<sub>2</sub>Cl<sub>2</sub>, 40 °C, 2 h; (iii) HBTU, DIPEA, DMF, rt, 24 h; (e) (i) **66**, Pd(OH)<sub>2</sub>/C, H<sub>2</sub>, MeOH, rt, 18 h; (ii) **2d**, TFA, CH<sub>2</sub>Cl<sub>2</sub>, 40 °C, 2 h; (iii) HATU, DIPEA, DMF; rt, 48 h; (f) TFA, CH<sub>2</sub>Cl<sub>2</sub>, 40 °C, 2 h.

**Table S1:** Overview on calculated physicochemical properties of toolbox compound 1–5.

| Cmpd      | SMILES string                                                                         | TPSA <sup>a</sup> |
|-----------|---------------------------------------------------------------------------------------|-------------------|
| <b>1a</b> | <chem>CC(C)(C)OC(=O)NCCOCCNc1cccc2C(=O)N(C3CCC(=O)NC3=O)C(=O)c12</chem>               | 143               |
| <b>1b</b> | <chem>CC(C)(C)OC(=O)NCCOCCOCCNc1cccc2C(=O)N(C3CCC(=O)NC3=O)C(=O)c12</chem>            | 152               |
| <b>1c</b> | <chem>CC(C)(C)OC(=O)NCCCOCCOCCCNc1cccc2C(=O)N(C3CCC(=O)NC3=O)C(=O)c12</chem>          | 152               |
| <b>1d</b> | <chem>CC(C)(C)OC(=O)NCCOCCOCCOCCNc1cccc2C(=O)N(C3CCC(=O)NC3=O)C(=O)c12</chem>         | 162               |
| <b>1e</b> | <chem>CC(C)(C)OC(=O)NCCCOCCCCOCCCNc1cccc2C(=O)N(C3CCC(=O)NC3=O)C(=O)c12</chem>        | 152               |
| <b>1f</b> | <chem>CC(C)(C)OC(=O)NCCCOCCOCCOCCCNc1cccc2C(=O)N(C3CCC(=O)NC3=O)C(=O)c12</chem>       | 162               |
| <b>2a</b> | <chem>CC(C)(C)OC(=O)CCCNc1cccc2C(=O)N(C3CCC(=O)NC3=O)C(=O)c12</chem>                  | 122               |
| <b>2b</b> | <chem>CC(C)(C)OC(=O)CCCCNc1cccc2C(=O)N(C3CCC(=O)NC3=O)C(=O)c12</chem>                 | 122               |
| <b>2c</b> | <chem>CC(C)(C)OC(=O)CCC(=O)NCCOCCOCCNc1cccc2C(=O)N(C3CCC(=O)NC3=O)C(=O)c12</chem>     | 169               |
| <b>2d</b> | <chem>CC(C)(C)OC(=O)CCC(=O)NCCCOCCCCOCCCNc1cccc2C(=O)N(C3CCC(=O)NC3=O)C(=O)c12</chem> | 169               |
| <b>3a</b> | <chem>O=C1CCC(N2C(=O)c3cccc(NCCCCOCC#C)c3C2=O)C(=O)N1</chem>                          | 105               |
| <b>3b</b> | <chem>O=C1CCC(N2C(=O)c3cccc(NCCOCCOCC#C)c3C2=O)C(=O)N1</chem>                         | 114               |
| <b>3c</b> | <chem>O=C1CCC(N2C(=O)c3cccc(NCCOCCOCCOCC#C)c3C2=O)C(=O)N1</chem>                      | 123               |
| <b>3d</b> | <chem>O=C1CCC(N2C(=O)c3cccc(NCCOCCOCCOCCOCC#C)c3C2=O)C(=O)N1</chem>                   | 133               |
| <b>4a</b> | <chem>ClCCCCCOCCCCCNc1cccc2C(=O)N(C3CCC(=O)NC3=O)C(=O)c12</chem>                      | 105               |
| <b>4b</b> | <chem>ClCCCCCOCCOCCNc1cccc2C(=O)N(C3CCC(=O)NC3=O)C(=O)c12</chem>                      | 114               |
| <b>4c</b> | <chem>ClCCCCCOCCOCCOCCNc1cccc2C(=O)N(C3CCC(=O)NC3=O)C(=O)c12</chem>                   | 123               |
| <b>4d</b> | <chem>ClCCCCCOCCOCCOCCOCCNc1cccc2C(=O)N(C3CCC(=O)NC3=O)C(=O)c12</chem>                | 133               |
| <b>5a</b> | <chem>O=C1CCC(N2C(=O)c3cccc(NCCOCCOCCc4cccc4)c3C2=O)C(=O)N1</chem>                    | 114               |
| <b>5b</b> | <chem>O=C1CCC(N2C(=O)c3cccc(NCCOCCOCCOCCc4cccc4)c3C2=O)C(=O)N1</chem>                 | 123               |
| <b>5c</b> | <chem>O=C1CCC(N2C(=O)c3cccc(NCCOCCOCCOCCOCCc4cccc4)c3C2=O)C(=O)N1</chem>              | 133               |
| <b>5d</b> | <chem>O=C1CCC(N2C(=O)c3cccc(NCCCCCOCCCCCOCCc4cccc4)c3C2=O)C(=O)N1</chem>              | 114               |

<sup>a</sup> Topological polar surface area given in Å<sup>2</sup>.

## Supplementary Information: Biology

### A. Cell Lines

MM1S and LP-1 cell lines were obtained from the American Type Culture Collection (ATCC). Cells were cultured in RPMI-1640 (Biochrom) supplemented with 10% heat-inactivated fetal bovine serum (FBS) (Biochrom) and 1% penicillin/streptomycin, 1% L-glutamine and kept in a humidified incubator under 5% CO<sub>2</sub>. Cells have been authenticated by STR profile analyses and tested for mycoplasma contamination.

### B. Immunoblotting

After designated treatment, cells were harvested and lysed in IP lysis buffer (Pierce) containing HALT protease and phosphatase inhibitor cocktail (Thermo Scientific). Protein content was determined with a bicinchoninic acid (BCA) assay and equal protein amounts were separated by sodium dodecyl sulfate-polyacrylamide gel electrophoresis at a constant voltage. Protein was transferred onto an Immobilon-P transfer membrane (Millipore). For western blot analyses, the following antibodies were used: CRBN (1:500, Sigma HPA045910), IKZF1 (1:1000, Cell Signaling 14859S, clone: D6N9Y), BAX (1:1000, Cell signaling, clone: D2E11), or  $\alpha$ -Tubulin (1:7000, Sigma T5168, clone: B512).

### C. Cell Viability Assay

Cells were seeded in biological triplicates in a 96-plate and treated with the indicated concentrations of compounds or pomalidomide for 96 h. CellTiter-Glo<sup>®</sup> Luminescent Cell Viability Assay (Promega) was performed according to the manufacturer's protocol to determine the number of viable cells. Luminescence was readout on a PolarStar plate reader (BMG labtech).

### D. Statistical Analysis

Statistical analysis was performed using a two-sided Student *t*-test and Prism (v6.01, GraphPad). Variance of biological replicates is represented as mean  $\pm$  SEM.



## Supplementary Information: Chemistry

### E. Determination of logP values

The determination of the logP values was performed according to the chromatographic method of Donovan and Pescatore (2002).<sup>3</sup> By correlating the retention time with the molecules lipophilicity with the aid of two validated internal standards, it is possible to estimate the logP value. The experiment was performed using a Waters 2695 Separations Module coupled with a Waters 996 Photodiode Array Detector. The column was a 10 × 4 mm LiChrospher 100 RP-18 5 μm EC from Chromatographie Service GmbH (Langerwehe, Germany), which was operated at 25 °C. The aqueous mobile phase consisted of a 0.01 M phosphate buffer solution with a pH of 6.8 to ensure the presence of the unionized compounds. The flow-rate was set to 1 mL/min with a linear gradient from 10 to 100% MeOH in 10 min, followed by a 6 min equilibration time. The detection wavelength was set at 260 nm and 390 nm, respectively. A standard solution of toluene (tol) and triphenylene (triph) as internal standards was prepared as follows: 10 mg triphenylene and 1 mL toluene were added to a volumetric flask and were diluted up to 100 mL of MeOH. Subsequently, approximately 1 mg of the analytes was dissolved in the standard solution and 10 μL were injected. The unknown logP values can be calculated from the retention time with the following equation:

$$\log P_{\text{analyte}} = \frac{(\log P_{\text{tol}} - \log P_{\text{triph}})t_{\text{analyte}} + t_{\text{tol}}\log P_{\text{triph}} - t_{\text{triph}}\log P_{\text{tol}}}{t_{\text{tol}} - t_{\text{triph}}}$$

### F. Molecular Descriptor Calculation

Predicted values for the topological polar surface area (TPSA)<sup>4</sup> were calculated using the KNIME<sup>5</sup> implementation of RDKit.<sup>6</sup>

## G. Measurements of Absorption and Emission Spectra

Absorption spectra were recorded on a Varian Cary 50 Bio spectrometer, emission spectra on a Monaco Safas spectrofluorometer flx at ambient temperature.

## H. General Remarks

Preparative column chromatography was performed using Merck silica gel 60 (63–200 mesh). Petroleum ether used was a mixture of alkanes boiling between 40 – 60 °C. Melting points were determined on a Büchi 510 oil bath apparatus or on a Reichelt hot-stage apparatus and were uncorrected. <sup>1</sup>H NMR and <sup>13</sup>C NMR spectra were recorded on a Bruker Avance 400 MHz NMR spectrometer, Bruker Avance 500 MHz NMR spectrometer or on a Bruker Avance III 600 MHz NMR spectrometer, respectively. NMR spectra were processed and analyzed in MestReNova. Chemical shifts are given in parts per million (ppm), coupling constants *J* are given in Hertz, and spin multiplicities are given as s (singlet), d (doublet), t (triplet), q (quartet) or m (multiplet). In case of overlapping extraneous solvent peaks, multiplet analyses in <sup>1</sup>H NMR spectra were performed using qGSD (quantitative Global Spectral Deconvolution). HRMS was recorded on a micrOTOF-Q mass spectrometer (Bruker) with ESI-source coupled with an HPLC Dionex UltiMate 3000 (Thermo Scientific). The purity and identity of the compounds was determined by HPLC-UV obtained on an LC-MS instrument (Applied Biosystems API 2000 LC/MS/MS, HPLC Agilent 1100) or separately on a LC instrument (Acquity UPLC) and mass spectrometer (Thermo Scientific Q Exactive Plus). The purity of all the final compounds was confirmed to be ≥95% purity by LC.

## I. Synthesis of the Toolbox Compounds 1-5

**General Procedure I: Boc protection of alkanolamines.** A solution of di-*tert*-butyl dicarbonate (2.40 g, 11.0 mmol) in dry CH<sub>2</sub>Cl<sub>2</sub> (10 mL) was added dropwise to a stirring solution of the corresponding alkanolamine (10.0 mmol) in dry CH<sub>2</sub>Cl<sub>2</sub> (10 mL) at 0 °C. The mixture was stirred for 30 min at 0 °C and then at rt for 18 h. Subsequently, the solution was diluted with CH<sub>2</sub>Cl<sub>2</sub> (100 mL), washed with saturated NaHCO<sub>3</sub>, H<sub>2</sub>O and brine (each 50 mL), dried over Na<sub>2</sub>SO<sub>4</sub>, filtered, and concentrated *in vacuo*.

**General Procedure II: Mesylation.**<sup>7</sup> To a solution of the corresponding alcohol (20 mmol) in dry CH<sub>2</sub>Cl<sub>2</sub> (20 mL), Et<sub>3</sub>N (3.04 g, 4.18 mL, 30 mmol) was added under argon atmosphere and the mixture was cooled to 0 °C. Subsequently, methanesulfonyl chloride (3.44 g, 2.34 mL, 30 mmol) was added dropwise at 0 °C, followed by stirring of the mixture at rt for 3 h. After the reaction was complete (monitored by TLC), MeOH (20 mL) was added to the mixture carefully. The volatiles were then evaporated and the resultant residue was partitioned between EtOAc (100 mL) and H<sub>2</sub>O (100 mL). The organic layer was further washed with brine (2 × 100 mL), dried over Na<sub>2</sub>SO<sub>4</sub>, filtered and evaporated.

**General Procedure III: Azidolysis.**<sup>7</sup> Sodium azide (1.95 g, 30 mmol) was added to a solution of the corresponding methanesulfonate (10 mmol) in DMF under argon atmosphere at rt. The reaction mixture was stirred at 70 °C for 24 h. Then, DMF was evaporated under reduced pressure and the resultant oily residue was partitioned between EtOAc (100 mL) and H<sub>2</sub>O (100 mL). The organic phase was washed with brine (5 × 50 mL), dried over Na<sub>2</sub>SO<sub>4</sub>, filtered and evaporated.

**General Procedure IV: Staudinger reduction.**<sup>7</sup> To a solution of the corresponding azide (5 mmol) in THF (15 mL), PPh<sub>3</sub> (2.62 g, 10 mmol) was added under argon atmosphere at rt. After 10 minutes, H<sub>2</sub>O (0.14 g, 0.14 mL, 7.5 mmol) was added in a single portion, followed by stirring of the mixture at rt for 24 h. Subsequently, the reaction mixture was evaporated under reduced pressure to yield crude oily products.

**General Procedure V: Mono-Cbz protection of bisamines.** To a solution of the corresponding bisamine (100 mmol) and Et<sub>3</sub>N (1.21 g, 1.67 mL, 12 mmol) in CHCl<sub>3</sub> (200 mL), a solution of benzyl chloroformate (1.71 g, 1.43 mL, 10 mmol) in CHCl<sub>3</sub> (200 mL) was added dropwise at 0 °C over 3 h period. Subsequently, the reaction mixture was allowed to warm to rt and was stirred for additional 24 h. Then, the mixture was washed with saturated NaHCO<sub>3</sub>, H<sub>2</sub>O and brine (each 200 mL), dried over Na<sub>2</sub>SO<sub>4</sub>, filtered and concentrated under reduced pressure.

**General Procedure VI: Mono-Boc protection of bisamines.** A solution of di-*tert*-butyl dicarbonate (2.18 g, 10.0 mmol) in CHCl<sub>3</sub> (100 mL) was added dropwise to a stirring solution of the corresponding bisamine (100 mmol) in CHCl<sub>3</sub> (100 mL) at 0 °C. The mixture was then stirred at rt 18 h. Subsequently, the solution was washed with H<sub>2</sub>O (3 × 200 mL) and brine (200 mL), dried over Na<sub>2</sub>SO<sub>4</sub>, filtered, and concentrated *in vacuo*.

**General Procedure VII: Etherification of methanesulfonates with propargyl alcohol.**<sup>8</sup> To a solution stirred suspension of NaH (60% dispersion in mineral oil, 0.72 g, 18 mmol) in dry THF (10 mL) under an nitrogen atmosphere was added propargyl alcohol (1.68 g, 1.77 mL, 30 mmol) in dry THF (5 mL) at 0 °C and it was stirred for 30 min. Subsequently, a mixture of the corresponding methanesulfonate (10 mmol) in dry THF (5 mL) was added dropwise. The resulting suspension was stirred at rt overnight and was then quenched with saturated NH<sub>4</sub>Cl solution (10 mL) and the organic solvent was removed *in vacuo*. The resultant liquid was partitioned between H<sub>2</sub>O (50 mL) and EtOAc (100 mL). The organic layer was further washed with saturated NH<sub>4</sub>Cl solution, saturated NaHCO<sub>3</sub> solution and brine (each 50 mL), dried over Na<sub>2</sub>SO<sub>4</sub>, filtered and concentrated *in vacuo*.

**General Procedure VIII: Etherification of Boc-protected alkanolamines with 1-chloro-6-iodohexane.** The corresponding boc-protected alkanolamine (5 mmol) was dissolved in dry THF (25 mL) and it was cooled to 0 °C. A mixture of potassium *tert*-butoxide (0.56 g, 5 mmol) in dry THF (10 mL) was added. The yellow mixture was stirred for 30 min at 0 °C. Then, 1-chloro-6-iodohexane (1.48 g, 0.91 mL, 6.0 mmol) was added dropwise at this temperature. After 3 h at 0 °C, stirring was continued at rt 18 h. Subsequently, H<sub>2</sub>O (5 mL) was added to the suspension and the organic solvent was evaporated. The remaining residue was partitioned between EtOAc (50 mL) and H<sub>2</sub>O (50 mL), and the aqueous layer was extracted again with EtOAc (2 × 50 mL). The combined organic layers were dried over Na<sub>2</sub>SO<sub>4</sub>, filtered and evaporated.

**General Procedure IX: Boc-deprotection and nucleophilic aromatic substitution ( $S_NAr$ ).** The Boc-protected amine (1 mmol) was dissolved in dry  $CH_2Cl_2$  (5 mL) and it was treated with trifluoroacetic acid (5 mL). The reaction mixture was stirred for 2 h at rt. The solvent was removed and it was coevaporated with dry  $CH_2Cl_2$  (3 × 5 mL). The oily residue was further dried in high vacuum. The amine was dissolved in dry DMSO (10 mL) and DIPEA (0.52 g, 0.70 mL, 4 mmol). Finally, 4-fluoro-thalidomide<sup>3</sup> (**10**, 0.28 g, 1 mmol) was added, and the mixture was stirred at 90 °C for 18 h. After cooling to rt, the yellow or green mixture was partitioned between half-saturated brine (100 mL) and EtOAc (3 × 50 mL). The combined organic layers were further washed with saturated  $NH_4Cl$  solution, 5% LiCl solution, and brine (each 50 mL). The organic layers were dried over  $Na_2SO_4$ , filtered and concentrated *in vacuo*.

**General Procedure X: Cbz-deprotection and nucleophilic aromatic substitution ( $S_NAr$ ).** The Cbz-protected amine (2 mmol) was dissolved in dry EtOAc (20 mL) and treated with 10% Pd/C (10% m/m). The reaction mixture was stirred under  $H_2$  (1 atm, balloon) overnight. The mixture was filtered through celite and the filtrate was concentrated. The oily residue was redissolved in dry DMSO (20 mL) and DIPEA (0.52 g, 0.70 mL, 4 mmol) as well as 4-fluorothalidomide (**10**, 0.55 g, 2 mmol) were added. The mixture was stirred at 90 °C for 18 h. After cooling, it was poured onto half-saturated brine (200 mL) and it was extracted with EtOAc (2 × 100 mL). The combined organic layers were washed with 5% LiCl solution (100 mL) and brine (100 mL), dried over  $Na_2SO_4$ , filtered and concentrated.

**General Procedure XI: Boc-deprotection and HATU coupling.** The Boc-protected linker-pomalidomide conjugate (0.25 mmol) was dissolved in dry  $CH_2Cl_2$  (5 mL) and it was treated with trifluoroacetic acid (5 mL). The reaction mixture was stirred for 2 h at rt. The solvent was removed and it was coevaporated with dry  $CH_2Cl_2$  (3 × 5 mL). The oily residue was further dried in high vacuum. 1-Adamantaneacetic acid (49 mg, 0.25 mmol) was dissolved in dry DMF (5 mL) and DIPEA (0.13 g, 0.17 mL, 1.0 mmol) and HATU (105 mg, 0.275 mmol) were added. After stirring for 5 min, the deprotected amine derivative, dissolved in dry DMF (5 mL), was added. The combined mixture was stirred at rt for 18 h. Half-saturated brine (50 mL) was added and it was extracted with EtOAc (3 × 25 mL). The combined organic layers were further washed with saturated  $NH_4Cl$  solution, 5% LiCl solution, and brine (each 50 mL). The organic layers were dried over  $Na_2SO_4$ , filtered and concentrated *in vacuo*.

#### 4-Fluorothalidomide (10)

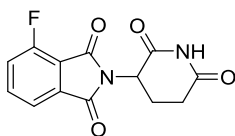

This compound was synthesized as described previously.<sup>9</sup>

### 1. Carbamate-protected amino linkers:

#### *tert*-Butyl *N*-[2-(2-hydroxyethoxy)ethyl]carbamate (11)

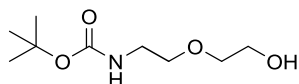

This compound was prepared using the General Procedure I and 2-(2-aminoethoxy)ethan-1-ol (1.05 g, 10 mmol). The crude product was purified by column chromatography (EtOAc/*n*-hexane 1:1) to give a colorless oil.

Yield (1.50 g, 73%);  $R_f = 0.18$  (EtOAc/*n*-hexane 1:1);  $^1\text{H NMR}$  (400 MHz, DMSO- $d_6$ )  $\delta$  1.37 (s, 9H, CH<sub>3</sub>), 3.06 (q,  $J = 5.8$  Hz, 2H, CH<sub>2</sub>NH), 3.34 – 3.41 (m, 4H, OCH<sub>2</sub>), 3.44 – 3.50 (m, 2H, OCH<sub>2</sub>), 4.58 (t,  $J = 5.6$  Hz, 1H, OH), 6.78 (t,  $J = 5.8$  Hz, 1H, NH);  $^{13}\text{C NMR}$  (101 MHz, CDCl<sub>3</sub>)  $\delta$  28.30 (C(CH<sub>3</sub>)<sub>3</sub>), 40.24 (CH<sub>2</sub>NH), 61.48 (CH<sub>2</sub>OH), 70.20 (OCH<sub>2</sub>), 72.17 (OCH<sub>2</sub>), 79.24 (C(CH<sub>3</sub>)<sub>3</sub>), 156.12 (CO); **LC-MS** (ESI) (90% H<sub>2</sub>O to 100% MeCN in 10 min, then 100% MeCN to 20 min),  $t_R = 0.58$  min,  $m/z$  [M + H]<sup>+</sup> calcd for C<sub>9</sub>H<sub>19</sub>NO<sub>4</sub>, 206.13; found, 206.0; **HRMS** (ESI)  $m/z$  [M + Na]<sup>+</sup> calcd for C<sub>9</sub>H<sub>19</sub>NO<sub>4</sub>, 228.1206; found, 228.1198.

#### 2-(2-((*tert*-Butoxycarbonyl)amino)ethoxy)ethyl methanesulfonate (12)

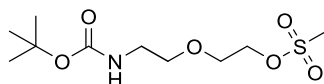

This compound was prepared using the General Procedure II and compound 11 (4.12 g, 20 mmol). The crude product (colorless oil) was used in the next step without further purification.

Yield (5.12 g, 90%);  $R_f = 0.66$  (EtOAc);  $^1\text{H NMR}$  (400 MHz, CDCl<sub>3</sub>)  $\delta$  1.43 (s, 9H, CH<sub>3</sub>), 3.05 (s, 3H, SO<sub>2</sub>CH<sub>3</sub>), 3.36 (q,  $J = 5.4$  Hz, 2H, CH<sub>2</sub>NH), 3.52 – 3.58 (m, 2H, OCH<sub>2</sub>), 3.70 – 3.74 (m, 2H, OCH<sub>2</sub>), 4.33 – 4.37 (m, 2H,

OCH<sub>2</sub>), 4.91 (br s, 1H, NH); <sup>13</sup>C NMR (101 MHz, CDCl<sub>3</sub>) δ 28.25 (C(CH<sub>3</sub>)<sub>3</sub>), 37.52 (SO<sub>2</sub>CH<sub>3</sub>), 40.06 (CH<sub>2</sub>NH), 68.51 (OCH<sub>2</sub>), 68.78 (OCH<sub>2</sub>), 70.21 (OCH<sub>2</sub>), 79.22 (C(CH<sub>3</sub>)<sub>3</sub>), 155.81 (CO); LC-MS (ESI) (90% H<sub>2</sub>O to 100% MeCN in 10 min, then 100% MeCN to 20 min, DAD 194-400 nm), t<sub>R</sub> = 6.70 min, 99% purity; HRMS (ESI) m/z [M + H]<sup>+</sup> calcd for C<sub>10</sub>H<sub>21</sub>NO<sub>6</sub>S, 284.1162; found, 284.1153.

#### **tert-Butyl (2-(2-azidoethoxy)ethyl)carbamate (13)**

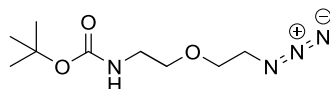

This compound was prepared using the General Procedure III and compound **12** (2.83 g, 10 mmol). The crude product (colorless oil) was used in the next step without further purification.

Yield (1.91 g, 83%); R<sub>f</sub> = 0.71 (EtOAc); <sup>1</sup>H NMR (400 MHz, CDCl<sub>3</sub>) δ 1.44 (s, 9H, CH<sub>3</sub>), 3.27 (q, J = 5.2 Hz, 2H, CH<sub>2</sub>NH), 3.23 (t, J = 5.1 Hz, 2H, N<sub>3</sub>CH<sub>2</sub>), 3.49 (t, J = 5.2 Hz, 2H, OCH<sub>2</sub>), 3.60 (t, J = 5.1 Hz, 2H, OCH<sub>2</sub>), 4.95 (br s, 1H, NH); <sup>13</sup>C NMR (101 MHz, CDCl<sub>3</sub>) δ 28.22 (C(CH<sub>3</sub>)<sub>3</sub>), 40.17 (CH<sub>2</sub>NH), 50.49 (CH<sub>2</sub>N<sub>3</sub>), 69.75 (OCH<sub>2</sub>), 70.15 (OCH<sub>2</sub>), 79.19 (C(CH<sub>3</sub>)<sub>3</sub>), 155.84 (CO); HPLC (95% H<sub>2</sub>O to 95% MeCN in 10 min, then 95% MeCN for 4 min), t<sub>R</sub> = 4.87 min, 95% purity, detection at 210 nm; HRMS (ESI) m/z [M + Na]<sup>+</sup> calcd for C<sub>9</sub>H<sub>18</sub>N<sub>4</sub>O<sub>3</sub>, 253.1271; found, 253.1269.

#### **tert-Butyl (2-(2-aminoethoxy)ethyl)carbamate (14)**

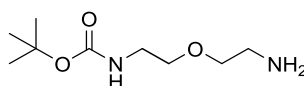

This compound was prepared using the General Procedure IV and compound **13** (1.15 g, 5 mmol). The crude product was purified by column chromatography (CH<sub>2</sub>Cl<sub>2</sub>/MeOH/NH<sub>4</sub>OH 15:1:0.5) to give a colorless oil.

Yield (0.86 g, 84%); R<sub>f</sub> = 0.40 (CH<sub>2</sub>Cl<sub>2</sub>/MeOH/NH<sub>4</sub>OH 30:1:0.5); <sup>1</sup>H NMR (400 MHz, CDCl<sub>3</sub>) δ 1.42 (br s, 2H, NH<sub>2</sub>), 1.43 (s, 9H, CH<sub>3</sub>), 2.85 (t, J = 5.1 Hz, 2H, CH<sub>2</sub>NH<sub>2</sub>), 3.31 (q, J = 5.1 Hz, 2H, CH<sub>2</sub>NH), 3.46 (t, J = 5.1 Hz, 2H, OCH<sub>2</sub>), 3.50 (t, J = 5.1 Hz, 2H, OCH<sub>2</sub>), 4.95 (br s, 1H, NH); <sup>13</sup>C NMR (101 MHz, CDCl<sub>3</sub>) δ 28.16 (C(CH<sub>3</sub>)<sub>3</sub>), 40.11 (CH<sub>2</sub>NH), 41.24 (CH<sub>2</sub>NH<sub>2</sub>), 69.75 (OCH<sub>2</sub>), 72.39 (OCH<sub>2</sub>), 78.89 (C(CH<sub>3</sub>)<sub>3</sub>), 155.87 (CO); HPLC (95% H<sub>2</sub>O to 95% MeCN in 10 min, then 95% MeCN for 4 min), t<sub>R</sub> = 3.19 min, 96% purity, detection at 210 nm; HRMS (ESI) m/z [M + H]<sup>+</sup> calcd for C<sub>9</sub>H<sub>20</sub>N<sub>2</sub>O<sub>3</sub>, 205.1547; found, 205.1541.

### Benzyl (2-(2-hydroxyethoxy)ethyl)carbamate (**15**)<sup>10</sup>

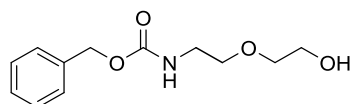

This compound was synthesized similar to a previously reported procedure.<sup>4</sup> Briefly, to a cooled (0 °C) solution of 2-(2-aminoethoxy)ethan-1-ol (3.15 g, 30 mmol) in CH<sub>2</sub>Cl<sub>2</sub> (40 mL), Et<sub>3</sub>N (3.04 g, 4.16 mL, 30 mmol) and a solution of benzyl chloroformate (5.18 g, 4.28 mL, 30 mmol) in CH<sub>2</sub>Cl<sub>2</sub> (40 mL) were added consecutively. The reaction mixture was first stirred at 0 °C for 2 h, followed by stirring at rt for 24 h. The resulting mixture was then washed with saturated NaHCO<sub>3</sub> (30 mL) and this aqueous phase washed again with CH<sub>2</sub>Cl<sub>2</sub> (3 × 50 mL). The combined organic layers were dried over Na<sub>2</sub>SO<sub>4</sub>, filtered and evaporated under reduced pressure. The compound was purified by column chromatography (EtOAc) to yield a colorless oil.

Yield (6.30 g, 88%); *R<sub>f</sub>* = 0.38 (EtOAc); <sup>1</sup>H NMR (400 MHz, CDCl<sub>3</sub>) δ 2.52 (t, *J* = 5.7 Hz, 1H, OH), 3.39 (q, *J* = 5.1 Hz, 2H, CH<sub>2</sub>NH), 3.47 – 3.53 (m, 4H, OCH<sub>2</sub>), 3.70 (q, *J* = 5.4 Hz, 2H, HOCH<sub>2</sub>), 5.09 (s, 2H, CH<sub>2</sub>), 5.39 (br s, 1H, NHCO), 7.27 – 7.39 (m, 5H, Ar-H); <sup>13</sup>C NMR (101 MHz, CDCl<sub>3</sub>) δ 40.79 (CH<sub>2</sub>NH), 61.63 (CH<sub>2</sub>OH), 66.71 (COOCH<sub>2</sub>), 70.04 (OCH<sub>2</sub>), 72.17 (OCH<sub>2</sub>), 128.09 (C-4'), 128.09 (C-2'), 128.47 (C-3'), 136.42 (C-1'), 156.55 (CO); HPLC (95% H<sub>2</sub>O (with 0.1% TFA) to 95% MeCN in 10 min, then 95% MeCN for 4 min), *t<sub>R</sub>* = 3.95 min, 97% purity, detection at 210 nm; HRMS (ESI) *m/z* [M + Na]<sup>+</sup> calcd for C<sub>12</sub>H<sub>17</sub>NO<sub>4</sub>, 262.1050; found, 262.1040.

### 2-(2-(((Benzyloxy)carbonyl)amino)ethoxy)ethyl methanesulfonate (**16**)

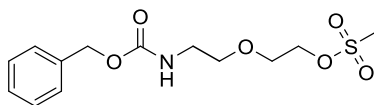

This compound was prepared using the General Procedure II and compound **15** (4.78 g, 20 mmol). The crude product (yellow oil) was used in the next step without further purification.

Yield (6.46 g, 99%); *R<sub>f</sub>* = 0.60 (EtOAc); <sup>1</sup>H NMR (400 MHz, CDCl<sub>3</sub>) δ 2.97 (s, 3H, SO<sub>2</sub>CH<sub>3</sub>), 3.36 (q, *J* = 5.4 Hz, 2H, CH<sub>2</sub>NH), 3.54 (t, *J* = 5.3 Hz, 2H, OCH<sub>2</sub>), 3.64 – 3.70 (m, 2H, OCH<sub>2</sub>), 4.27 – 4.34 (m, 2H, OCH<sub>2</sub>), 5.07 (s, 2H, CH<sub>2</sub>), 5.31 (t, *J* = 5.5 Hz, 1H, NHCO), 7.24 – 7.39 (m, 5H, Ar-H); <sup>13</sup>C NMR (101 MHz, CDCl<sub>3</sub>) δ 37.39 (SO<sub>2</sub>CH<sub>3</sub>), 40.52 (CH<sub>2</sub>NH), 66.48 (COOCH<sub>2</sub>), 68.47 (OCH<sub>2</sub>), 68.67 (OCH<sub>2</sub>), 69.29 (OCH<sub>2</sub>), 127.93 (C-4'), 127.95 (C-2'), 128.36 (C-3'), 136.37 (C-1'), 156.28 (CO); HPLC (95% H<sub>2</sub>O (with 0.1% TFA) to 95% MeCN in



10 min, then 95% MeCN for 4 min),  $t_R = 4.64$  min, 94% purity, detection at 210 nm; **HRMS** (ESI)  $m/z$   $[M + Na]^+$  calcd for  $C_{13}H_{19}NO_6S$ , 340.0825; found, 340.0812.

### Benzyl (2-(2-azidoethoxy)ethyl)carbamate (**17**)

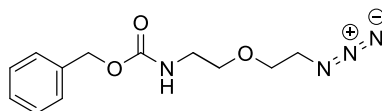

This compound was prepared using the General Procedure **III** and compound **16** (3.17 g, 10 mmol). The crude product (yellow oil) was used in the next step without further purification.

Yield (2.45 g, 93%);  $R_f = 0.76$  (EtOAc);  $^1H$  NMR (400 MHz,  $CDCl_3$ )  $\delta$  3.37 (t,  $J = 4.8$  Hz, 2H,  $N_3CH_2$ ), 3.39 (q,  $J = 5.4$  Hz, 2H,  $CH_2NH$ ), 3.54 (t,  $J = 5.1$  Hz, 2H,  $OCH_2$ ), 3.62 (t,  $J = 5.1$  Hz, 2H,  $OCH_2$ ), 5.09 (s, 2H,  $CH_2$ ), 5.26 (t,  $J = 5.5$  Hz, 1H,  $NHCO$ ), 7.23 – 7.41 (m, 5H, Ar-H);  $^{13}C$  NMR (101 MHz,  $CDCl_3$ )  $\delta$  40.68 ( $CH_2NH$ ), 50.44 ( $CH_2N_3$ ), 66.51 ( $COOCH_2$ ), 69.78 ( $OCH_2$ ), 69.92 ( $OCH_2$ ), 127.89 (C-4'), 127.92 (C-2'), 128.35 (C-3'), 136.42 (C-1'), 156.31 (CO); **HPLC** (95%  $H_2O$  (with 0.1% TFA) to 95% MeCN in 10 min, then 95% MeCN for 4 min),  $t_R = 5.20$  min, 98% purity, detection at 210 nm; **HRMS** (ESI)  $m/z$   $[M + Na]^+$  calcd for  $C_{12}H_{16}N_4O_3$ , 287.1115; found, 287.1104.

### Benzyl (2-(2-aminoethoxy)ethyl)carbamate (**18**)

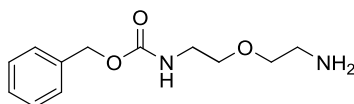

This compound was prepared using the General Procedure **VII** and compound **17** (1.32 g, 5 mmol). The crude product was purified by column chromatography ( $CH_2Cl_2/MeOH/NH_4OH$  30:1:0.5) to give a yellow oil.

Yield (1.11 g, 93%);  $R_f = 0.28$  ( $CH_2Cl_2/MeOH/NH_4OH$  9:1:0.5);  $^1H$  NMR (400 MHz,  $CDCl_3$ )  $\delta$  1.47 (br s, 2H,  $NH_2$ ), 2.81 (t,  $J = 5.1$  Hz, 2H,  $CH_2NH_2$ ), 3.37 (q,  $J = 5.3$  Hz, 2H,  $CH_2NH$ ), 3.43 (t,  $J = 5.3$  Hz, 2H,  $OCH_2$ ), 3.50 (t,  $J = 5.1$  Hz, 2H,  $OCH_2$ ), 5.08 (s, 2H,  $COOCH_2$ ), 5.44 (br s, 1H,  $NHCO$ ), 7.24 – 7.38 (m, 5H, Ar-H);  $^{13}C$  NMR (101 MHz,  $CDCl_3$ )  $\delta$  40.79 ( $CH_2NH$ ), 41.60 ( $CH_2NH_2$ ), 66.54 ( $COOCH_2$ ), 69.65 ( $OCH_2$ ), 73.01 ( $OCH_2$ ), 127.98 (C-2'), 128.00 (C-4'), 128.39 (C-3'), 136.46 (C-1'), 156.38 (CO); **HPLC** (95%  $H_2O$  (with 0.1% TFA) to 95% MeCN in 10 min, then 95% MeCN for 4 min),  $t_R = 3.26$  min, 98% purity, detection at 210 nm; **HRMS** (ESI)  $m/z$   $[M + H]^+$  calcd for  $C_{12}H_{18}N_2O_3$ , 239.1390; found, 239.1388.

**tert-Butyl N-[2-[2-(2-aminoethoxy)ethoxy]ethyl]carbamate (19)**

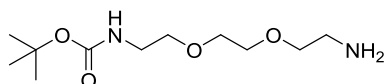

This compound was prepared using the General Procedure **VI** and 2,2'-(ethylenedioxy)bis(ethylamine) (14.82 g, 100 mmol) to give a colorless oil.

Yield (1.99 g, 80%);  $^1\text{H NMR}$  (500 MHz, DMSO- $d_6$ )  $\delta$  1.36 (s, 9H, CH<sub>3</sub>), 2.64 (t,  $J$  = 5.7 Hz, 2H, CH<sub>2</sub>NH<sub>2</sub>), 3.05 (q,  $J$  = 6.0 Hz, 2H, NHCH<sub>2</sub>), 3.30 – 3.41 (m, 4H), 3.44 – 3.53 (m, 4H, OCH<sub>2</sub>), 6.72 (br s, 1H, NH). The signals for NH<sub>2</sub> are not visible;  $^{13}\text{C NMR}$  (126 MHz, DMSO- $d_6$ )  $\delta$  28.36 (CH<sub>3</sub>), 41.46 (CH<sub>2</sub>NH<sub>2</sub>), 69.31 (OCH<sub>2</sub>), 69.68 (OCH<sub>2</sub>), 73.13 (OCH<sub>2</sub>), 77.70 (C(CH<sub>3</sub>)<sub>3</sub>), 155.72 (CO). The signal for NHCH<sub>2</sub> is missing (overlapping solvent peaks); **LC-MS** (ESI) (90% H<sub>2</sub>O to 100% MeCN in 10 min, then 100% MeCN to 20 min),  $t_R$  = 3.26 min,  $m/z$  [M + H]<sup>+</sup> calcd for C<sub>11</sub>H<sub>24</sub>N<sub>2</sub>O<sub>4</sub>, 249.18; found, 249.3.

**Benzyl N-[2-[2-(2-aminoethoxy)ethoxy]ethyl]carbamate (20)**

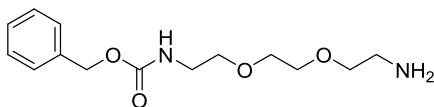

This compound was prepared using the General Procedure **V** and 2,2'-(ethylenedioxy)bis(ethylamine) (14.82 g, 100 mmol) to give a colorless oil.

Yield (2.46 g, 87%);  $R_f$  = 0.21 (CH<sub>2</sub>Cl<sub>2</sub>/MeOH/Et<sub>3</sub>N 19:1:0.5);  $^1\text{H NMR}$  (500 MHz, DMSO- $d_6$ )  $\delta$  2.65 (t,  $J$  = 5.7 Hz, 2H, CH<sub>2</sub>NH<sub>2</sub>), 3.14 (q,  $J$  = 5.9 Hz, 2H, NHCH<sub>2</sub>), 3.33 – 3.44 (m, 4H), 3.45 – 3.53 (m, 4H, OCH<sub>2</sub>), 5.00 (s, 2H, COOCH<sub>2</sub>), 7.18 – 7.40 (m, 5H, Ar-H); The signals for NH and NH<sub>2</sub> are not visible;  $^{13}\text{C NMR}$  (126 MHz, DMSO- $d_6$ )  $\delta$  41.24 (CH<sub>2</sub>NH<sub>2</sub>), 65.36 (COOCH<sub>2</sub>), 69.26 (OCH<sub>2</sub>), 69.69 (2 × OCH<sub>2</sub>), 72.63 (OCH<sub>2</sub>), 127.85 (C-2'), 127.89 (C-4'), 128.48 (C-3'), 137.36 (C-1), 156.33 (CO). The signal for NHCH<sub>2</sub> is missing (overlapping solvent peaks); **LC-MS** (ESI) (90% H<sub>2</sub>O to 100% MeOH in 10 min, then 100% MeOH to 20 min, DAD 200-400 nm),  $t_R$  = 7.10 min, 99% purity,  $m/z$  [M + H]<sup>+</sup> calcd for C<sub>14</sub>H<sub>22</sub>N<sub>2</sub>O<sub>4</sub>, 283.16; found, 282.9.

**tert-Butyl N-[3-[2-(3-aminopropoxy)ethoxy]propyl]carbamate (21)**

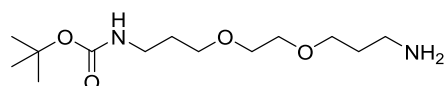

This compound was prepared using the General Procedure VI and ethylene glycol bis(3-aminopropyl) ether (17.63 g, 100 mmol). The crude product was purified by column chromatography (CH<sub>2</sub>Cl<sub>2</sub>/MeOH/Et<sub>3</sub>N 19:1:0.5) to give a colorless oil.

Yield (1.74 g, 63%); *R<sub>f</sub>* = 0.18 (CH<sub>2</sub>Cl<sub>2</sub>/MeOH/Et<sub>3</sub>N 19:1:0.5); <sup>1</sup>H NMR (500 MHz, DMSO-*d*<sub>6</sub>) δ 1.36 (s, 9H, CH<sub>3</sub>), 1.49 – 1.64 (m, 4H, CH<sub>2</sub>, NH<sub>2</sub>), 2.52 – 2.61 (m, 2H, CH<sub>2</sub>), 2.89 – 2.99 (m, 4H, CH<sub>2</sub>), 3.32 – 3.46 (m, 8H, OCH<sub>2</sub>), 6.71 (t, *J* = 5.9 Hz, 1H, NHCH<sub>2</sub>); <sup>13</sup>C NMR (126 MHz, DMSO-*d*<sub>6</sub>) δ 28.40 (CH<sub>3</sub>), 29.87, 33.22 (CH<sub>2</sub>), 37.39, 38.86 (NCH<sub>2</sub>), 68.24, 68.59, 69.61, 69.68 (OCH<sub>2</sub>), 77.52 (C(CH<sub>3</sub>)<sub>3</sub>), 155.72 (CO); LC-MS (ESI) (90% H<sub>2</sub>O to 100% MeOH in 10 min, then 100% MeOH to 20 min), *t<sub>R</sub>* = 7.78 min, *m/z* [M + H]<sup>+</sup> calcd for C<sub>13</sub>H<sub>28</sub>N<sub>2</sub>O<sub>4</sub>, 277.21; found, 277.0; HRMS (ESI) *m/z* [M + H]<sup>+</sup> calcd for C<sub>13</sub>H<sub>28</sub>N<sub>2</sub>O<sub>4</sub>, 277.2122; found 277.2138.

**tert-Butyl N-[2-[2-[2-(2-hydroxyethoxy)ethoxy]ethoxy]ethyl]carbamate (22)<sup>11</sup>**

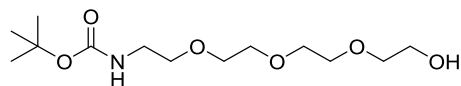

This compound was synthesized similar to a previously reported procedure.<sup>11</sup> The crude product was purified by column chromatography (gradient of petroleum ether/EtOAc 1:2 to EtOAc) followed by a second column chromatography (gradient of CH<sub>2</sub>Cl<sub>2</sub>/MeOH 49:1 to 19:1) to yield a light yellow oil.

Yield (40%); *R<sub>f</sub>* = 0.40 (CH<sub>2</sub>Cl<sub>2</sub>/MeOH 19:1); <sup>1</sup>H NMR (500 MHz, DMSO-*d*<sub>6</sub>) δ 1.36 (s, 9H CH<sub>3</sub>), 3.05 (q, *J* = 6.0 Hz, 2H, NHCH<sub>2</sub>), 3.34 – 3.42 (m, 4H), 3.46 – 3.52 (m, 10H, OCH<sub>2</sub>), 4.52 (t, *J* = 5.4 Hz, 1H, OH), 6.68 (br s, 1H, NHCH<sub>2</sub>); <sup>13</sup>C NMR (126 MHz, DMSO-*d*<sub>6</sub>) δ 28.38 (C(CH<sub>3</sub>)<sub>3</sub>), 60.38, 69.32, 69.67, 69.90, 69.92, 69.98, 72.48 (OCH<sub>2</sub>), 77.73 (C(CH<sub>3</sub>)<sub>3</sub>), 155.74 (CO). The signal for NHCH<sub>2</sub> is missing (overlapping solvent peaks); LC-MS (ESI) (90% H<sub>2</sub>O to 100% MeOH in 10 min, then 100% MeOH to 20 min), *t<sub>R</sub>* = 8.59 min, *m/z* [M + H]<sup>+</sup> calcd for C<sub>13</sub>H<sub>27</sub>NO<sub>6</sub>, 294.19; found, 294.1.

## 2-[2-[2-[2-(*tert*-Butoxycarbonylamino)ethoxy]ethoxy]ethoxy]ethyl methanesulfonate (**23**)

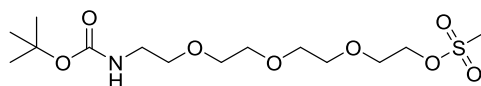

This compound was prepared using the General Procedure II and compound **22** (5.87 g, 20 mmol). The crude product was purified by column chromatography (gradient of petroleum ether/EtOAc 2:1 to EtOAc) to yield a colorless oil.

Yield (6.24 g, 84%);  $R_f = 0.50$  (EtOAc);  $^1\text{H NMR}$  (600 MHz, DMSO- $d_6$ )  $\delta$  1.36 (s, 9H, C(CH<sub>3</sub>)<sub>3</sub>), 3.05 (q,  $J = 6.1$  Hz, 2H, CH<sub>2</sub>), 3.16 (s, 3H, CH<sub>3</sub>), 3.36 (t,  $J = 6.1$  Hz, 2H, CH<sub>2</sub>), 3.45 – 3.58 (m, 8H), 3.64 – 3.68 (m, 2H), 4.26 – 4.32 (m, 2H, OCH<sub>2</sub>), 6.71 (t,  $J = 5.8$  Hz, 1H, NHCH<sub>2</sub>);  $^{13}\text{C NMR}$  (151 MHz, DMSO- $d_6$ )  $\delta$  28.41 (C(CH<sub>3</sub>)<sub>3</sub>), 37.01 (CH<sub>3</sub>), 68.46, 69.34, 69.68, 69.84, 69.89, 69.93 (OCH<sub>2</sub>), 77.79 (C(CH<sub>3</sub>)<sub>3</sub>), 155.78 (CO). The signal for NHCH<sub>2</sub> is missing (overlapping solvent peaks); **LC-MS** (ESI) (90% H<sub>2</sub>O to 100% MeOH in 10 min, then 100% MeOH to 20 min),  $t_R = 9.07$  min,  $m/z$  [M + H]<sup>+</sup> calcd for C<sub>14</sub>H<sub>29</sub>NO<sub>8</sub>S, 372.16; found, 372.0; **HRMS** (ESI)  $m/z$  [M + H]<sup>+</sup> calcd for C<sub>14</sub>H<sub>29</sub>NO<sub>8</sub>S, 372.1687; found 372.1688.

## *tert*-Butyl *N*-[2-[2-[2-(2-azidoethoxy)ethoxy]ethoxy]ethyl]carbamate (**24**)

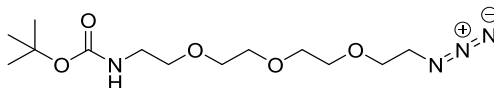

This compound was prepared using the General Procedure III and compound **23** (3.71 g, 10 mmol). The crude product was purified by column chromatography (gradient of petroleum ether/EtOAc 2:1 to 1:1) to yield a colorless oil.

Yield (1.94 g, 61%);  $R_f = 0.38$  (petroleum ether/EtOAc 1:1);  $^1\text{H NMR}$  (600 MHz, DMSO- $d_6$ )  $\delta$  1.36 (s, 9H, CH<sub>3</sub>), 3.05 (q,  $J = 6.0$  Hz, 2H, NHCH<sub>2</sub>), 3.33 – 3.41 (m, 4H), 3.46 – 3.56 (m, 8H), 3.57 – 3.62 (m, 2H, OCH<sub>2</sub>, N<sub>3</sub>CH<sub>2</sub>), 6.70 (br s, 1H, NH);  $^{13}\text{C NMR}$  (151 MHz, DMSO- $d_6$ )  $\delta$  28.39 (C(CH<sub>3</sub>)<sub>3</sub>), 50.17 (CH<sub>2</sub>N<sub>3</sub>), 69.33, 69.42, 69.67, 69.87, 69.95, 69.98, 77.74 (C(CH<sub>3</sub>)<sub>3</sub>), 155.76 (CO). The signal for NHCH<sub>2</sub> is missing (overlapping solvent peaks); **LC-MS** (ESI) (90% H<sub>2</sub>O to 100% MeOH in 10 min, then 100% MeOH to 20 min),  $t_R = 10.02$  min,  $m/z$  [M + H]<sup>+</sup> calcd for C<sub>13</sub>H<sub>26</sub>N<sub>4</sub>O<sub>5</sub>, 319.19; found, 319.0; **HRMS** (ESI)  $m/z$  [M + Na]<sup>+</sup> calcd for C<sub>13</sub>H<sub>26</sub>N<sub>4</sub>O<sub>5</sub>, 341.1795; found 341.1796.

**tert-Butyl N-[2-[2-[2-(2-aminoethoxy)ethoxy]ethoxy]ethyl]carbamate (25)**

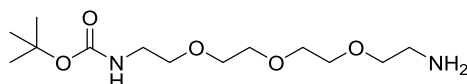

This compound was prepared using the General Procedure **IV** and compound **24** (1.59 g, 5 mmol). The crude product was purified by column chromatography (CH<sub>2</sub>Cl<sub>2</sub>/MeOH/Et<sub>3</sub>N 19:1:0.5) to give a colorless oil.

Yield (0.72 g, 49%); *R<sub>f</sub>* = 0.37 (CH<sub>2</sub>Cl<sub>2</sub>/MeOH/Et<sub>3</sub>N 19:1:0.5); <sup>1</sup>H NMR (600 MHz, DMSO-*d*<sub>6</sub>) δ 1.36 (s, 9H, CH<sub>3</sub>), 2.65 (t, *J* = 5.7 Hz, 2H, CH<sub>2</sub>NH<sub>2</sub>), 3.05 (q, *J* = 6.0 Hz, 2H, NHCH<sub>2</sub>), 3.32 – 3.39 (m, 4H), 3.45 – 3.53 (m, 8H, OCH<sub>2</sub>), 6.75 (t, *J* = 5.8 Hz, 1H, NHCH<sub>2</sub>). The signals for NH<sub>2</sub> are not visible; <sup>13</sup>C NMR (151 MHz, DMSO-*d*<sub>6</sub>) δ 28.40 (C(CH<sub>3</sub>)<sub>3</sub>), 41.33 (CH<sub>2</sub>NH<sub>2</sub>), 69.34, 69.68, 69.75, 69.92, 69.94, 72.81 (OCH<sub>2</sub>), 77.73 (C(CH<sub>3</sub>)<sub>3</sub>), 155.76 (CO). The signal for NHCH<sub>2</sub> is missing (overlapping solvent peaks); LC-MS (ESI) (90% H<sub>2</sub>O to 100% MeOH in 10 min, then 100% MeOH to 20 min), *t<sub>R</sub>* = 7.14 min, *m/z* [M + H]<sup>+</sup> calcd for C<sub>13</sub>H<sub>28</sub>N<sub>2</sub>O<sub>5</sub>, 293.20; found, 293.0.

**tert-Butyl N-[3-[4-(3-aminopropoxy)butoxy]propyl]carbamate (26)**

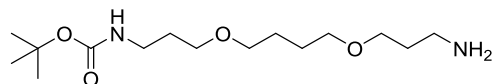

This compound was prepared using the General Procedure **VI** and 4,9-dioxa-1,12-dodecanediamine (20.43 g, 100 mmol). The crude product was purified by column chromatography (CH<sub>2</sub>Cl<sub>2</sub>/MeOH/Et<sub>3</sub>N 19:1:0.5) to give a colorless oil.

Yield (2.50 g, 82%); *R<sub>f</sub>* = 0.25 (CH<sub>2</sub>Cl<sub>2</sub>/MeOH/Et<sub>3</sub>N 19:1:0.5); <sup>1</sup>H NMR (500 MHz, DMSO-*d*<sub>6</sub>) δ 1.36 (s, 9H, CH<sub>3</sub>), 1.45 – 1.62 (m, 8H, CH<sub>2</sub>), 2.57 (t, *J* = 6.8 Hz, 2H, CH<sub>2</sub>NH<sub>2</sub>), 2.94 (q, *J* = 6.7 Hz, 2H, NHCH<sub>2</sub>), 3.29 – 3.40 (m, 8H, OCH<sub>2</sub>), 6.70 (t, *J* = 5.7 Hz, 1H, NHCH<sub>2</sub>). The signals for NH<sub>2</sub> are not visible; <sup>13</sup>C NMR (126 MHz, DMSO-*d*<sub>6</sub>) δ 26.23 (2 × CH<sub>2</sub>), 28.41 (C(CH<sub>3</sub>)<sub>3</sub>), 29.92, 33.22 (CH<sub>2</sub>), 37.46, 38.92 (NCH<sub>2</sub>), 67.85, 68.21, 69.97, 70.00 (OCH<sub>2</sub>), 77.53 (C(CH<sub>3</sub>)<sub>3</sub>), 155.74 (CO); LC-MS (ESI) (90% H<sub>2</sub>O to 100% MeOH in 10 min, then 100% MeOH to 20 min), *t<sub>R</sub>* = 8.62 min, *m/z* [M + H]<sup>+</sup> calcd for C<sub>15</sub>H<sub>32</sub>N<sub>2</sub>O<sub>4</sub>, 305.24; found, 305.0.

### Benzyl *N*-[3-[4-(3-aminopropoxy)butoxy]propyl]carbamate (27)

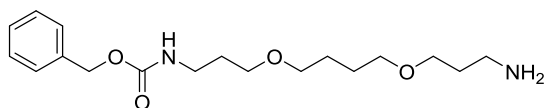

This compound was prepared using the General Procedure **V** and 4,9-dioxa-1,12-dodecanediamine (20.43 g, 100 mmol). The crude product was purified by column chromatography (CH<sub>2</sub>Cl<sub>2</sub>/MeOH/Et<sub>3</sub>N 19:1:0.5) to give a colorless oil.

Yield (3.24 g, 96%);  $R_f = 0.32$  (CH<sub>2</sub>Cl<sub>2</sub>/MeOH/Et<sub>3</sub>N 19:1:0.5); <sup>1</sup>H NMR (600 MHz, DMSO-*d*<sub>6</sub>) δ 1.43 – 1.65 (m, 9H, CH<sub>2</sub>, NHCHH, NH<sub>2</sub>), 2.57 (t,  $J = 6.9$  Hz, 2H, CH<sub>2</sub>NH<sub>2</sub>), 3.03 (q,  $J = 6.6$  Hz, 3H, NHCHH, CH<sub>2</sub>), 3.31 – 3.40 (m, 8H, OCH<sub>2</sub>), 4.99 (s, 2H, OCH<sub>2</sub>), 7.20 (t,  $J = 5.9$  Hz, 1H, CONH), 7.28 – 7.37 (m, 5H, Ar-H); <sup>13</sup>C NMR (151 MHz, DMSO-*d*<sub>6</sub>) δ 26.22, 29.85, 33.14 (CH<sub>2</sub>), 37.83, 38.89 (NCH<sub>2</sub>), 65.27, 67.67, 68.18, 69.95, 70.00 (OCH<sub>2</sub>), 127.86, 127.89 (C-2', C-4'), 128.49 (C-3'), 137.45 (C-1'), 156.24 (CO); LC-MS (ESI) (90% H<sub>2</sub>O to 100% MeCN in 10 min, then 100% MeCN to 20 min, DAD 200-400 nm),  $t_R = 6.73$  min, 99% purity,  $m/z$  [M + H]<sup>+</sup> calcd for C<sub>18</sub>H<sub>30</sub>N<sub>2</sub>O<sub>4</sub>, 339.22; found, 339.0; HRMS (ESI)  $m/z$  [M + H]<sup>+</sup> calcd for C<sub>18</sub>H<sub>30</sub>N<sub>2</sub>O<sub>4</sub>, 339.2274; found, 339.2259.

### *tert*-Butyl *N*-[3-[2-[2-(3-aminopropoxy)ethoxy]ethoxy]propyl]carbamate (28)

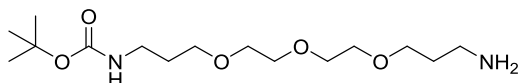

This compound was prepared using the General Procedure **VI** and diethylene glycol bis(3-aminopropyl) ether (22.03 g, 100 mmol). The crude product was purified by column chromatography (CH<sub>2</sub>Cl<sub>2</sub>/MeOH/Et<sub>3</sub>N 19:1:0.5) to give a colorless oil.

Yield (2.60 g, 81%);  $R_f = 0.18$  (CH<sub>2</sub>Cl<sub>2</sub>/MeOH/Et<sub>3</sub>N 19:1:0.5); <sup>1</sup>H NMR (500 MHz, DMSO-*d*<sub>6</sub>) δ 1.36 (s, 9H, CH<sub>3</sub>), 1.44 – 1.71 (m, 4H, CH<sub>2</sub>), 2.56 (t,  $J = 6.8$  Hz, 2H, CH<sub>2</sub>NH<sub>2</sub>), 2.95 (q,  $J = 6.7$  Hz, 2H, NHCH<sub>2</sub>), 3.34 – 3.61 (m, 12H, OCH<sub>2</sub>), 6.71 (t,  $J = 5.7$  Hz, 1H, NHCH<sub>2</sub>). The signals for NH<sub>2</sub> are not visible; <sup>13</sup>C NMR (126 MHz, DMSO-*d*<sub>6</sub>) δ 28.41 (C(CH<sub>3</sub>)<sub>3</sub>), 29.88, 33.43 (CH<sub>2</sub>), 37.40, 38.95 (NCH<sub>2</sub>), 68.26, 68.64, 69.67, 69.71, 69.94, 69.96 (OCH<sub>2</sub>), 77.54 (C(CH<sub>3</sub>)<sub>3</sub>), 155.75 (CO); LC-MS (ESI) (90% H<sub>2</sub>O to 100% MeCN in 10 min, then 100% MeCN to 20 min),  $t_R = 8.00$  min,  $m/z$  [M + H]<sup>+</sup> calcd for C<sub>15</sub>H<sub>32</sub>N<sub>2</sub>O<sub>5</sub>, 321.23; found, 321.0; HRMS (ESI)  $m/z$  [M + H]<sup>+</sup> calcd for C<sub>15</sub>H<sub>32</sub>N<sub>2</sub>O<sub>5</sub>, 321.2384; found, 321.2400.

### Benzyl (3-(2-(2-(3-aminopropoxy)ethoxy)ethoxy)propyl)carbamate (29)

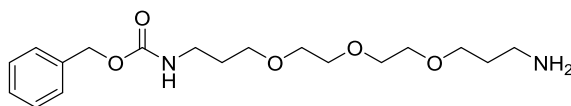

This compound was prepared using the General Procedure **V** and 4,7,10-trioxa-1,13-tridecandiamine (22.03 g, 100 mmol). The crude product was purified by column chromatography (CH<sub>2</sub>Cl<sub>2</sub>/MeOH/NH<sub>4</sub>OH 15:1:0.5) to give a colorless oil.

Yield (2.16 g, 61%); *R<sub>f</sub>* = 0.39 (CH<sub>2</sub>Cl<sub>2</sub>/MeOH/NH<sub>4</sub>OH 9:1:0.5); <sup>1</sup>H NMR (400 MHz, CDCl<sub>3</sub>) δ 1.60 – 1.71 (m, 4H, CH<sub>2</sub>, NH<sub>2</sub>), 1.77 (p, *J* = 6.1 Hz, 2H, CH<sub>2</sub>), 2.75 (t, *J* = 6.7 Hz, 2H, CH<sub>2</sub>NH<sub>2</sub>), 3.30 (q, *J* = 6.3 Hz, 2H, CH<sub>2</sub>NH), 3.46 – 3.63 (m, 12H, OCH<sub>2</sub>), 5.07 (s, 2H, CH<sub>2</sub>), 5.62 (br s, 1H, NHCO), 7.26 – 7.39 (m, 5H, Ar-H); <sup>13</sup>C NMR (101 MHz, CDCl<sub>3</sub>) δ 29.29 (CH<sub>2</sub>), 33.16 (CH<sub>2</sub>), 39.06 (CH<sub>2</sub>NH), 39.52 (CH<sub>2</sub>NH<sub>2</sub>), 66.36 (COOCH<sub>2</sub>), 69.37 (OCH<sub>2</sub>), 69.51 (OCH<sub>2</sub>), 70.08 (OCH<sub>2</sub>), 70.13 (OCH<sub>2</sub>), 70.47 (OCH<sub>2</sub>), 70.53 (OCH<sub>2</sub>), 127.93 (C-2'), 128.03 (C-4'), 128.40 (C-3'). 136.76 (C-1'), 156.49 (CO); HPLC (95% H<sub>2</sub>O (with 0.1% TFA) to 95% MeCN in 10 min, then 95% MeCN for 4 min), *t<sub>R</sub>* = 4.13 min, 99% purity, detection at 210 nm; HRMS (ESI) *m/z* [M + H]<sup>+</sup> calcd for C<sub>18</sub>H<sub>30</sub>N<sub>2</sub>O<sub>5</sub>, 355.2227; found, 355.2225.

### Boc-protected amino tool compound 1a<sup>12</sup>

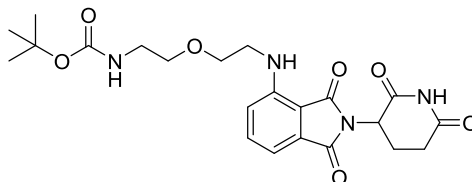

This compound was prepared using the General Procedure **IX** for the nucleophilic aromatic substitution, where 0.21 g (0.74 mmol) of 4-fluorothalidomide and 0.15 g (0.74 mmol) of compound **14** were used. The crude product was purified by column chromatography (EtOAc/*n*-hexane 2:1) to give a yellow solid.

Yield (0.22 g, 65%); mp 58 – 60 °C; *R<sub>f</sub>* = 0.42 (EtOAc); <sup>1</sup>H NMR (400 MHz, DMSO-*d*<sub>6</sub>) δ 1.36 (s, 9H, CH<sub>3</sub>), 1.99 – 2.06 (m, 1H, 4'-H), 2.46 – 2.62 (m, 2H, 4'-H, 5'-H), 2.83 – 2.94 (m, 1H, 5'-H), 3.08 (q, *J* = 5.9 Hz, 2H, NHCH<sub>2</sub>), 3.39 – 3.50 (m, 4H, OCH<sub>2</sub>), 3.59 (t, *J* = 5.4 Hz, 2H, NHCH<sub>2</sub>), 5.05 (dd, *J* = 5.3, 12.7 Hz, 1H, 3'-H), 6.61 (t, *J* = 5.9 Hz, 1H), 6.77 (t, *J* = 5.4 Hz, 1H, NHCH<sub>2</sub>), 7.04 (d, *J* = 7.0 Hz, 1H), 7.14 (d, *J* = 8.7 Hz, 1H, 5-H, 7-H), 7.58 (dd, *J* = 7.0, 8.7 Hz, 1H, 6-H), 11.11 (br s, 1H, NH); <sup>13</sup>C NMR (101 MHz, DMSO-*d*<sub>6</sub>) δ 22.08 (C-4'), 28.15 (C(CH<sub>3</sub>)<sub>3</sub>), 30.92 (C-5'), 41.61 (Ar-NHCH<sub>2</sub>), 42.03 (CH<sub>2</sub>NH), 48.49 (C-3'), 68.54 (OCH<sub>2</sub>), 69.02 (OCH<sub>2</sub>), 77.57 (C(CH<sub>3</sub>)<sub>3</sub>), 109.16 (C-3a), 110.63 (C-7), 117.41 (C-5), 132.02 (C-7a), 136.18 (C-6), 146.34 (C-4), 155.54 (NHCO), 167.24 (C-3), 168.89 (C-1), 170.04 (C-2'), 172.77 (C-6'); HPLC (95% H<sub>2</sub>O to 95% MeCN in

10 min, then 95% MeCN for 4 min),  $t_R = 5.24$  min, 99% purity, detection at 210 nm; **HRMS** (ESI)  $m/z$   $[M - H]^-$  calcd for  $C_{22}H_{28}N_4O_7$ , 459.1870; found, 459.1879.

### Boc-protected amino tool compound **1b**<sup>12</sup>

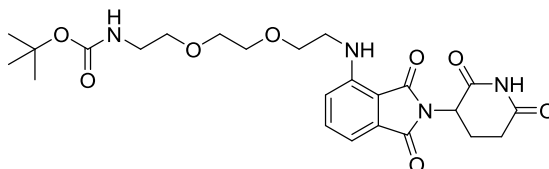

This compound was prepared using the General Procedure **IX** for the nucleophilic aromatic substitution, where 0.41 g (1.5 mmol) of 4-fluorothalidomide and 0.37 g (1.5 mmol) of compound **19** were used. The crude product was purified by column chromatography (gradient of petroleum ether/EtOAc 1:1 to 1:2) to give a yellow solid.

Yield (0.27 g, 35%); mp 58 – 60 °C;  $R_f = 0.32$  (petroleum ether/EtOAc 1:2);  **$^1H$  NMR** (500 MHz, DMSO- $d_6$ )  $\delta$  1.35 (s, 9H,  $CH_3$ ), 1.98 – 2.06 (m, 1H, 4'-H), 2.51 – 2.63 (m, 2H, 4'-H, 5'-H), 2.81 – 2.93 (m, 1H, 5'-H), 3.02 – 3.07 (m, 2H,  $NHCH_2$ ), 3.37 (t,  $J = 6.2$  Hz, 2H), 3.43 – 3.48 (m, 2H), 3.49 – 3.53 (m, 2H), 3.53 – 3.57 (m, 2H,  $OCH_2$ ), 3.61 (t,  $J = 5.4$  Hz, 2H,  $NHCH_2$ ), 5.04 (dd,  $J = 5.4, 12.7$  Hz, 1H, 3'-H), 6.59 (t,  $J = 5.8$  Hz, 1H,  $NHCH_2$ ), 6.63 – 6.72 (m, 1H, CONH), 7.03 (d,  $J = 7.1$  Hz, 1H), 7.13 (d,  $J = 8.6$  Hz, 1H, 5-H, 7-H), 7.57 (dd,  $J = 7.1, 8.5$  Hz, 1H, 6-H), 11.05 (br s, 1H, NH);  **$^{13}C$  NMR** (126 MHz, DMSO- $d_6$ )  $\delta$  22.29 (C-4'), 28.36 ( $C(CH_3)_3$ ), 31.14 (C-5'), 41.88 ( $NHCH_2$ ), 48.73 (C-3'), 69.05, 69.37, 69.67, 69.85 ( $OCH_2$ ), 77.72 ( $C(CH_3)_3$ ), 109.45 (C-3a), 110.82 (C-7), 117.59 (C-5), 132.26 (C-7a), 136.36 (C-6), 146.58 (C-4), 155.73 (CO), 167.43 (C-1), 169.09 (C-3), 170.17 (C-2'), 172.89 (C-6'). One signal for  $NHCH_2$  is missing (overlapping solvent peaks); **LC-MS** (ESI) (90%  $H_2O$  to 100% MeCN in 10 min, then 100% MeCN to 20 min, DAD 220-400 nm),  $t_R = 8.07$  min, 95% purity,  $m/z$   $[M + H]^+$  calcd for  $C_{24}H_{32}N_4O_8$ , 505.23; found, 505.2; **HRMS** (ESI)  $m/z$   $[M + H]^+$  calcd for  $C_{24}H_{32}N_4O_8$ , 505.2293; found, 505.2294.



### Boc-protected amino tool compound **1c**

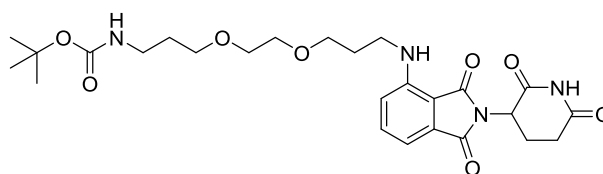

This compound was prepared using the General Procedure **IX** for the nucleophilic aromatic substitution, where 0.41 g (1.5 mmol) of 4-fluorothalidomide and 0.41 g (1.5 mmol) of compound **21** were used. The crude product was purified by column chromatography (gradient of petroleum ether/EtOAc 1:1 to 1:2) to give a yellow oil.

Yield (0.27 g, 75%);  $R_f = 0.31$  (petroleum ether/EtOAc 1:2);  $^1\text{H NMR}$  (500 MHz,  $\text{DMSO-}d_6$ )  $\delta$  1.35 (s, 9H,  $\text{CH}_3$ ), 1.51 – 1.64 (m, 2H), 1.72 – 1.88 (m, 2H,  $\text{CH}_2$ ), 1.95 – 2.07 (m, 1H, 4'-H), 2.45 – 2.65 (m, 2H, 4'-H, 5'-H), 2.80 – 3.00 (m, 3H, 5'-H,  $\text{NHCH}_2$ ), 3.31 – 3.43 (m, 4H), 3.43 – 3.59 (m, 6H,  $\text{OCH}_2$ ,  $\text{NHCH}_2$ ), 5.03 (dd,  $J = 5.4, 12.7$  Hz, 1H, 3'-H), 6.57 – 6.76 (m, 2H,  $\text{NHCH}_2$ ), 7.01 (d,  $J = 7.0$  Hz, 1H), 7.09 (d,  $J = 8.6$  Hz, 1H, 5-H, 7-H), 7.56 (dd,  $J = 7.1, 8.6$  Hz, 1H, 6-H), 11.04 (br s, 1H, NH);  $^{13}\text{C NMR}$  (126 MHz,  $\text{DMSO-}d_6$ )  $\delta$  22.31 (C-4'), 28.38 (C( $\text{CH}_3$ )<sub>3</sub>), 29.04, 29.88 ( $\text{CH}_2$ ), 31.12 (C-5'), 37.40 ( $\text{NHCH}_2$ ), 48.69 (C-3'), 68.27, 68.35, 69.62, 69.79 ( $\text{OCH}_2$ ), 77.52 (C( $\text{CH}_3$ )<sub>3</sub>), 109.26 (C-3a), 110.51 (C-7), 117.21 (C-5), 132.36 (C-7a), 136.39 (C-6), 146.61 (C-4), 155.70 (CO), 167.46 (C-1), 169.00 (C-3), 170.19 (C-2'), 172.90 (C-6'). One signal for  $\text{NHCH}_2$  is missing (overlapping solvent peaks); **LC-MS** (ESI) (90%  $\text{H}_2\text{O}$  to 100% MeOH in 10 min, then 100% MeOH to 20 min, DAD 220-450 nm),  $t_R = 10.70$  min, 97% purity,  $m/z$   $[\text{M} + \text{H}]^+$  calcd for  $\text{C}_{26}\text{H}_{36}\text{N}_4\text{O}_8$ , 533.26; found, 533.5; **HRMS** (ESI)  $m/z$   $[\text{M} + \text{H}]^+$  calcd for  $\text{C}_{26}\text{H}_{36}\text{N}_4\text{O}_8$ , 533.2606; found, 533.2588.

### Boc-protected amino tool compound **1d**<sup>13</sup>

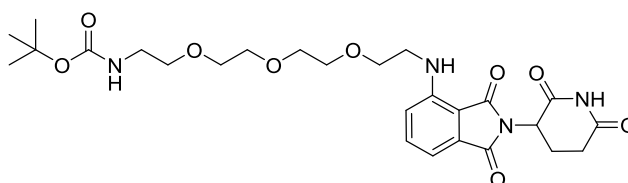

This compound was prepared using the General Procedure **IX** for the nucleophilic aromatic substitution, where 0.41 g (1.5 mmol) of 4-fluorothalidomide and 0.44 g (1.5 mmol) of compound **25** were used. The crude product was purified by column chromatography (gradient of petroleum ether/EtOAc 1:2 to 1:4) to give a yellow solid.

Yield (0.57 g, 69%); mp 50 – 52 °C;  $R_f$  = 0.50 (EtOAc);  $^1\text{H NMR}$  (500 MHz, DMSO- $d_6$ )  $\delta$  1.35 (s, 9H, CH<sub>3</sub>), 1.99 – 2.05 (m, 1H, 4'-H), 2.50 – 2.62 (m, 2H, 4'-H, 5'-H), 2.82 – 2.92 (m, 1H, 5'-H), 3.04 (q,  $J$  = 6.0 Hz, 2H, NHCH<sub>2</sub>), 3.35 (t,  $J$  = 6.2 Hz, 2H), 3.43 – 3.54 (m, 8H), 3.54 – 3.59 (m, 2H, OCH<sub>2</sub>), 3.61 (t,  $J$  = 5.4 Hz, 2H, NHCH<sub>2</sub>), 5.04 (dd,  $J$  = 5.5, 12.8 Hz, 1H, 3'-H), 6.59 (t,  $J$  = 5.8 Hz, 1H), 6.69 (t,  $J$  = 5.9 Hz, 1H, NHCH<sub>2</sub>), 7.03 (d,  $J$  = 7.0 Hz, 1H), 7.13 (d,  $J$  = 8.5 Hz, 1H, 5-H, 7-H), 7.57 (dd,  $J$  = 7.0, 8.6 Hz, 1H, 6-H), 11.06 (br s, 1H);  $^{13}\text{C NMR}$  (151 MHz, DMSO- $d_6$ )  $\delta$  22.31 (C-4'), 28.39 (C(CH<sub>3</sub>)<sub>3</sub>), 31.14 (C-5'), 41.88 (NHCH<sub>2</sub>), 48.73 (C-3'), 69.07, 69.32, 69.67, 69.94 (OCH<sub>2</sub>), 69.96 (2 × OCH<sub>2</sub>), 77.76 (C(CH<sub>3</sub>)<sub>3</sub>), 109.44 (C-3a), 110.85 (C-7), 117.63 (C-5), 132.28 (C-7a), 136.40 (C-6), 146.61 (C-4), 155.76 (CO), 167.47 (C-1), 169.12 (C-3), 170.22 (C-2'), 172.95 (C-6'). One signal for NHCH<sub>2</sub> is missing (overlapping solvent peaks); **LC-MS** (ESI) (90% H<sub>2</sub>O to 100% MeOH in 10 min, then 100% MeOH to 20 min, DAD 220-500 nm),  $t_R$  = 10.29 min, 99% purity,  $m/z$  [M + H]<sup>+</sup> calcd for C<sub>26</sub>H<sub>36</sub>N<sub>4</sub>O<sub>9</sub>, 549.25; found, 549.3; **HRMS** (ESI)  $m/z$  [M + H]<sup>+</sup> calcd for C<sub>26</sub>H<sub>36</sub>N<sub>4</sub>O<sub>9</sub>, 549.2555; found, 549.2540.

#### Boc-protected amino tool compound 1e

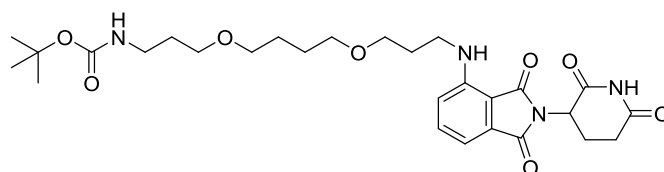

This compound was prepared using the General Procedure **IX** for the nucleophilic aromatic substitution, where 0.83 g (3.0 mmol) of 4-fluorothalidomide and 0.91 g (3.0 mmol) of compound **26** were used. The crude product was purified by column chromatography (gradient of petroleum ether/EtOAc 2:1 to 1:2) to give a yellow oil.

Yield (1.28 g, 76%);  $R_f$  = 0.42 (petroleum ether/EtOAc 1:2);  $^1\text{H NMR}$  (600 MHz, DMSO- $d_6$ )  $\delta$  1.35 (s, 9H), 1.46 – 1.63 (m, 6H), 1.74 – 1.83 (m, 2H, CH<sub>2</sub>), 1.98 – 2.06 (m, 1H, 4'-H), 2.45 – 2.63 (m, 2H, 4'-H, 5'-H), 2.81 – 2.91 (m, 1H, 5'-H), 2.94 (q,  $J$  = 6.6 Hz, 2H, NHCH<sub>2</sub>), 3.27 – 3.39 (m, 8H, OCH<sub>2</sub>), 3.44 (t,  $J$  = 5.9 Hz, 2H, NHCH<sub>2</sub>), 5.03 (dd,  $J$  = 5.4, 12.9 Hz, 1H, 3'-H), 6.63 (t,  $J$  = 5.9 Hz, 1H), 6.70 (t,  $J$  = 5.8 Hz, 1H, NHCH<sub>2</sub>), 7.01 (d,  $J$  = 7.0 Hz, 1H), 7.08 (d,  $J$  = 8.6 Hz, 1H, 5-H, 7-H), 7.57 (dd,  $J$  = 7.0, 8.6 Hz, 1H, 6-H), 11.06 (br s, 1H, NH);  $^{13}\text{C NMR}$  (151 MHz, DMSO- $d_6$ )  $\delta$  22.32 (C-4'), 26.14, 26.21 (CH<sub>2</sub>), 28.41 (C(CH<sub>3</sub>)<sub>3</sub>), 29.06, 29.92 (CH<sub>2</sub>), 31.14 (C-5'), 37.46 (NHCH<sub>2</sub>), 48.71 (C-3'), 67.84, 68.02, 70.01, 70.22 (OCH<sub>2</sub>), 77.54 (C(CH<sub>3</sub>)<sub>3</sub>), 109.27 (C-3a), 110.55 (C-7), 117.21 (C-5), 132.39 (C-7a), 136.42 (C-6), 146.61 (C-4), 155.74 (CO), 167.49 (C-1), 169.01 (C-3), 170.24 (C-2'), 172.96 (C-6'). One signal for NHCH<sub>2</sub> is missing (overlapping solvent peaks); **LC-MS** (ESI) (90% H<sub>2</sub>O to 100% MeOH in 10 min, then 100% MeOH to 20 min, DAD 220-500 nm),

$t_R = 11.21$  min, 98% purity,  $m/z$   $[M + H]^+$  calcd for  $C_{28}H_{40}N_4O_8$ , 561.29; found, 561.3; **HRMS** (ESI)  $m/z$   $[M + H]^+$  calcd for  $C_{28}H_{40}N_4O_8$ , 561.2919; found, 561.2909.

### Boc-protected amino tool compound **1f**<sup>14</sup>

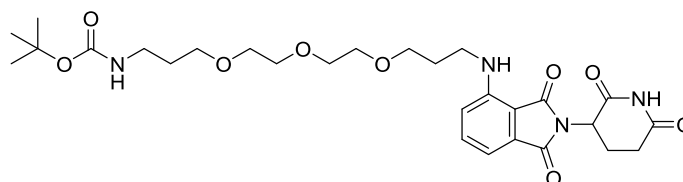

This compound was prepared using the General Procedure **IX** for the nucleophilic aromatic substitution, where 0.83 g (3.0 mmol) of 4-fluorothalidomide and 0.96 g (3.0 mmol) of compound **28** were used. The crude product was purified by column chromatography (gradient of petroleum ether/EtOAc 1:1 to 1:4) to give a yellow oil.

Yield (1.02 g, 59%);  $R_f = 0.33$  (petroleum ether/EtOAc 1:4); **<sup>1</sup>H NMR** (600 MHz, DMSO- $d_6$ )  $\delta$  1.35 (s, 9H, CH<sub>3</sub>), 1.53 – 1.61 (m, 2H), 1.76 – 1.84 (m, 2H, CH<sub>2</sub>), 1.98 – 2.05 (m, 1H, 4'-H), 2.46 – 2.61 (m, 2H, 4'-H, 5'-H), 2.83 – 2.91 (m, 1H, 5'-H), 2.94 (q,  $J = 6.6$  Hz, 2H, NHCH<sub>2</sub>), 3.33 – 3.38 (m, 4H), 3.42 – 3.46 (m, 2H), 3.46 – 3.56 (m, 8H, OCH<sub>2</sub>, NHCH<sub>2</sub>), 5.03 (dd,  $J = 5.5, 12.8$  Hz, 1H), 6.64 (t,  $J = 5.9$  Hz, 1H), 6.70 (t,  $J = 5.2$  Hz, 1H, NHCH<sub>2</sub>), 7.01 (d,  $J = 7.0$  Hz, 1H), 7.09 (d,  $J = 8.6$  Hz, 1H, 5-H, 7-H), 7.57 (dd,  $J = 7.0, 8.6$  Hz, 1H, 6-H), 11.06 (br s, 1H); **<sup>13</sup>C NMR** (151 MHz, DMSO- $d_6$ )  $\delta$  22.34 (C-4'), 28.42 (C(CH<sub>3</sub>)<sub>3</sub>), 29.07, 29.89 (CH<sub>2</sub>), 31.15 (C-5'), 37.42 (NHCH<sub>2</sub>), 48.72 (C-3'), 68.27, 68.39, 69.72, 69.88, 69.92, 69.97 (OCH<sub>2</sub>), 77.57 (C(CH<sub>3</sub>)<sub>3</sub>), 109.26 (C-3a), 110.55 (C-7), 117.27 (C-5), 132.39 (C-7a), 136.46 (C-6), 146.65 (C-4), 155.75 (CO), 167.51 (C-1), 169.04 (C-3), 170.25 (C-2'), 172.98 (C-6'). One signal for NHCH<sub>2</sub> is missing (overlapping solvent peaks); **LC-MS** (ESI) (90% H<sub>2</sub>O to 100% MeOH in 10 min, then 100% MeOH to 20 min, DAD 220-500 nm),  $t_R = 10.72$  min, 99% purity,  $m/z$   $[M + H]^+$  calcd for  $C_{28}H_{40}N_4O_9$ , 577.28; found, 577.2; **HRMS** (ESI)  $m/z$   $[M + H]^+$  calcd for  $C_{28}H_{40}N_4O_9$ , 577.2868; found, 577.2877.

### Cbz-protected amino tool compound 1g

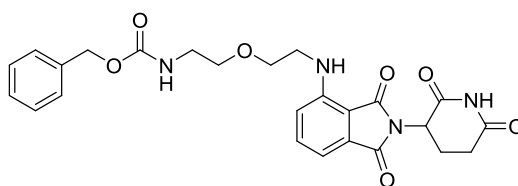

This compound was prepared using the General Procedure **IX** for the nucleophilic aromatic substitution, where 0.40 g (1.45 mmol) of 4-fluorothalidomide and 0.35 g (1.45 mmol) of compound **18** were used. The crude product was purified by column chromatography (EtOAc/*n*-hexane 1:1) to give a green solid.

Yield (0.26 g, 36%); mp 51 – 53 °C;  $R_f$  = 0.14 (EtOAc/*n*-hexane 1:1);  $^1\text{H NMR}$  (400 MHz, DMSO- $d_6$ )  $\delta$  1.99 – 2.05 (m, 1H, 4'-H), 2.45 – 2.63 (m, 2H, 4'-H, 5'-H), 2.80 – 2.94 (m, 1H, 5'-H), 3.16 (q,  $J$  = 5.7 Hz, 2H,  $\text{NHCH}_2$ ), 3.41 – 3.52 (m, 4H,  $\text{OCH}_2$ ), 3.60 (t,  $J$  = 5.3 Hz, 2H,  $\text{NHCH}_2$ ), 5.00 (s, 2H,  $\text{OCH}_2$ ), 5.05 (dd,  $J$  = 5.3, 12.8 Hz, 1H, 3'-H), 6.61 (t,  $J$  = 5.7 Hz, 1H,  $\text{CH}_2\text{NH}$ ), 7.03 (d,  $J$  = 7.0 Hz, 1H), 7.14 (d,  $J$  = 8.7 Hz, 1H, 5-H, 7-H), 7.24 – 7.38 (m, 6H, Ar-H,  $\text{CH}_2\text{NH}$ ), 7.57 (dd,  $J$  = 7.0, 8.7 Hz, 1H, 6-H), 11.11 (br s, 1H, NH);  $^{13}\text{C NMR}$  (101 MHz, DMSO- $d_6$ )  $\delta$  22.07 (C-4'), 30.92 (C-5'), 41.60 ( $\text{NHCH}_2$ ), 48.49 (C-3'), 65.20, 68.60, 68.98 ( $\text{OCH}_2$ ), 109.16 (C-3a), 110.63 (C-7), 117.41 (C-5), 127.66 (C-2''), 127.70 (C-4''), 128.28 (C-3''), 132.02 (C-7a), 136.18 (C-6), 137.12 (C-1''), 146.34 (C-4), 156.13 (NHCO), 167.25 (C-3), 168.88 (C-1), 170.05 (C-2'), 172.77 (C-6'). One signal for  $\text{NHCH}_2$  is missing (overlapping solvent peaks); **HPLC** (95% H<sub>2</sub>O (with 0.1% TFA) to 95% MeCN in 10 min, then 95% MeCN for 4 min),  $t_R$  = 5.45 min, 98% purity, detection at 210 nm; **HRMS** (ESI)  $m/z$ [M – H]<sup>–</sup> calcd for C<sub>22</sub>H<sub>26</sub>N<sub>4</sub>O<sub>7</sub>, 493.1718; found, 493.1723.

### Cbz-protected amino tool compound 1h

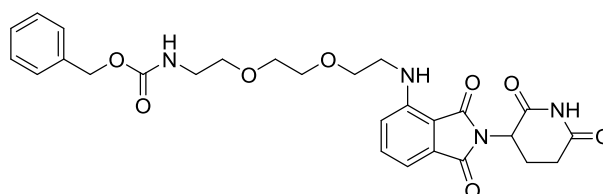

This compound was prepared using the General Procedure **IX** for the nucleophilic aromatic substitution, where 0.28 g (1.0 mmol) of 4-fluorothalidomide and 0.28 g (1.0 mmol) of compound **20** were used. The crude product was purified by column chromatography (gradient of petroleum ether/EtOAc 1:2 to EtOAc) to give a yellow oil.

Yield (0.29 g, 53%);  $R_f$  = 0.42 (EtOAc);  $^1\text{H NMR}$  (500 MHz, DMSO- $d_6$ )  $\delta$  1.95 – 2.06 (m, 1H, 4'-H), 2.44 – 2.62 (m, 2H, 4'-H, 5'-H), 2.79 – 2.93 (m, 1H, 5'-H), 3.13 (q,  $J$  = 5.9 Hz, 2H,  $\text{NHCH}_2$ ), 3.38 – 3.67 (m, 10H,

OCH<sub>2</sub>, NHCH<sub>2</sub>), 4.99 (s, 2H, OCH<sub>2</sub>), 5.04 (dd, *J* = 5.4, 12.8 Hz, 1H, 3'-H), 6.58 (t, *J* = 5.8 Hz, 1H), 7.18 (t, *J* = 5.7 Hz, 1H, CH<sub>2</sub>NH), 7.03 (d, *J* = 6.9 Hz, 1H), 7.12 (d, *J* = 8.7 Hz, 1H, 5-H, 7-H), 7.26 – 7.38 (m, 5H, Ar-H), 7.57 (dd, *J* = 7.1, 8.6 Hz, 1H, 6-H), 11.05 (br s, 1H, NH); <sup>13</sup>C NMR (126 MHz, DMSO-*d*<sub>6</sub>) δ 22.29 (C-4'), 31.13 (C-5'), 41.88 (NHCH<sub>2</sub>), 48.74 (C-3'), 65.36, 69.05, 69.31, 69.73, 69.85 (OCH<sub>2</sub>), 109.45 (C-3a), 110.83 (C-7), 117.59 (C-5), 127.85 (C-2''), 127.89 (C-4''), 128.48 (C-3''), 132.26 (C-7a), 136.37 (C-6), 137.35 (C-1''), 146.59 (C-4), 156.32 (CO), 167.45 (C-1), 169.11 (C-3), 170.19 (C-2'), 172.91 (C-6'). One signal for NHCH<sub>2</sub> is missing (overlapping solvent peaks); **LC-MS** (ESI) (90% H<sub>2</sub>O to 100% MeCN in 10 min, then 100% MeCN to 20 min, DAD 220-450 nm), *t*<sub>R</sub> = 8.24 min, 99% purity, *m/z* [M + H]<sup>+</sup> calcd for C<sub>27</sub>H<sub>30</sub>N<sub>4</sub>O<sub>8</sub>, 539.21; found, 539.3; **HRMS** (ESI) *m/z* [M + H]<sup>+</sup> calcd for C<sub>27</sub>H<sub>30</sub>N<sub>4</sub>O<sub>8</sub>, 539.2136; found, 539.2145.

### Cbz-protected amino tool compound 1i

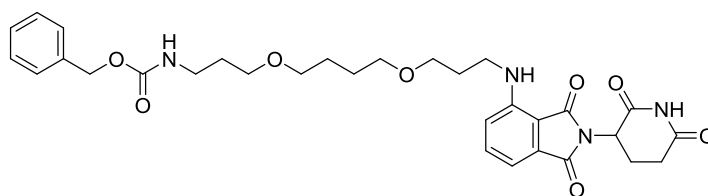

This compound was prepared using the General Procedure **IX** for the nucleophilic aromatic substitution, where 1.10 g (4.0 mmol) of 4-fluorothalidomide and 1.35 g (4.0 mmol) of compound **27** were used. The crude product was purified by column chromatography (gradient of CH<sub>2</sub>Cl<sub>2</sub>/EtOH 39:1 to 29:1) to give a yellow oil.

Yield (1.09 g, 46%); *R*<sub>f</sub> = 0.38 (CH<sub>2</sub>Cl<sub>2</sub>/EtOH 29:1); <sup>1</sup>H NMR (600 MHz, DMSO-*d*<sub>6</sub>) δ 1.46 – 1.56 (m, 4H), 1.57 – 1.65 (m, 2H), 1.74 – 1.84 (m, 2H, CH<sub>2</sub>), 1.92 – 2.12 (m, 1H, 4'-H), 2.46 – 2.63 (m, 2H, 4'-H, 5'-H), 2.81 – 2.93 (m, 1H, 5'-H), 3.03 (q, *J* = 6.6 Hz, 2H), 3.44 (t, *J* = 5.9 Hz, 2H, NHCH<sub>2</sub>), 3.26 – 3.39 (m, 8H, OCH<sub>2</sub>), 4.99 (s, 2H, OCH<sub>2</sub>), 5.03 (dd, *J* = 5.5, 12.8 Hz, 1H, 3'-H), 6.63 (t, *J* = 5.9 Hz, 1H), 7.18 (t, *J* = 5.7 Hz, 1H, CH<sub>2</sub>NH), 7.01 (d, *J* = 7.0 Hz, 1H), 7.07 (d, *J* = 8.6 Hz, 1H, 5-H, 7-H), 7.26 – 7.37 (m, 5H), 7.56 (dd, *J* = 7.0, 8.6 Hz, 1H, 6-H), 11.06 (br s, 1H, NH). <sup>13</sup>C NMR (151 MHz, DMSO-*d*<sub>6</sub>) δ 22.32 (C-4'), 26.13, 26.20, 29.05, 29.85 (CH<sub>2</sub>), 31.14 (C-5'), 37.84 (NHCH<sub>2</sub>), 48.71 (C-3'), 65.27, 67.68, 68.02, 70.01, 70.20 (OCH<sub>2</sub>), 109.27 (C-3a), 110.55 (C-7), 117.20 (C-5), 127.87 (C-2''), 127.90 (C-4''), 128.49 (C-3''), 132.38 (C-7a), 136.41 (C-6), 137.44 (C-1''), 146.60 (C-4), 156.25 (CO), 167.49 (C-1), 169.01 (C-3), 170.24 (C-2'), 172.96 (C-6'). One signal for NHCH<sub>2</sub> is missing (overlapping solvent peaks); **LC-MS** (ESI) (90% H<sub>2</sub>O to 100% MeCN in 10 min, then 100% MeCN to 20 min, DAD 220-450 nm), *t*<sub>R</sub> = 9.07 min, 97% purity, *m/z* [M + H]<sup>+</sup> calcd for C<sub>31</sub>H<sub>38</sub>N<sub>4</sub>O<sub>8</sub>, 595.27; found, 595.4; **HRMS** (ESI) *m/z* [M + H]<sup>+</sup> calcd for C<sub>31</sub>H<sub>38</sub>N<sub>4</sub>O<sub>8</sub>, 595.2762; found, 595.2737.

### Cbz-protected amino tool compound 1k

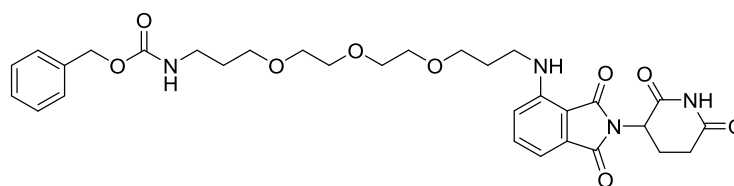

This compound was prepared using the General Procedure IV for the nucleophilic aromatic substitution, where 0.13 g (0.47 mmol) of 4-fluorothalidomide and 0.17 g (0.47 mmol) of compound **29** were used. The crude product was purified by column chromatography (EtOAc/*n*-hexane 4:1) to give a yellow oil.

Yield (0.12 g, 42%);  $R_f = 0.24$  (EtOAc);  $^1\text{H NMR}$  (400 MHz, DMSO- $d_6$ )  $\delta$  1.61 (p,  $J = 6.7$  Hz, 2H, CH<sub>2</sub>), 1.80 (p,  $J = 6.1$  Hz, 2H, CH<sub>2</sub>), 1.98 – 2.07 (m, 1H, 4'-H), 2.45 – 2.64 (m, 2H, 4'-H, 5'-H), 2.81 – 2.94 (m, 1H, 5'-H), 3.03 (q,  $J = 6.0$  Hz, 2H, Ar-NHCH<sub>2</sub>), 3.34 – 3.40 (m, 4H, OCH<sub>2</sub>), 3.44 – 3.57 (m, 10H, OCH<sub>2</sub>, CH<sub>2</sub>NH), 4.99 (s, 2H, CH<sub>2</sub>), 5.05 (dd,  $J = 5.3, 12.8$  Hz, 1H, 3'-H), 6.67 (t,  $J = 6.0$  Hz, 1H, Ar-NHCH<sub>2</sub>), 7.02 (d,  $J = 7.0$  Hz, 1H), 7.09 (d,  $J = 8.6$  Hz, 1H, 5-H, 7-H), 7.22 (t,  $J = 5.6$  Hz, 1H, CH<sub>2</sub>NHCO), 7.26 – 7.38 (m, 5H, Ar-H), 7.57 (dd,  $J = 7.0, 8.6$  Hz, 1H, 6-H), 11.10 (br s, 1H, NH);  $^{13}\text{C NMR}$  (101 MHz, DMSO- $d_6$ )  $\delta$  22.10 (C-4'), 28.82 (CH<sub>2</sub>), 29.57 (CH<sub>2</sub>), 30.92 (C-5'), 37.56 (CH<sub>2</sub>NH), 39.53 (Ar-NHCH<sub>2</sub>), 48.45 (C-3'), 65.08 (COOCH<sub>2</sub>), 67.86 (OCH<sub>2</sub>), 68.15 (OCH<sub>2</sub>), 69.48 (OCH<sub>2</sub>), 69.63 (OCH<sub>2</sub>), 60.67 (OCH<sub>2</sub>), 69.72 (OCH<sub>2</sub>), 108.97 (C-3a), 110.31 (C-7), 117.03 (C-5), 127.69 (C-2', C-4'), 128.28 (C-3'), 132.13 (C-7a), 136.22 (C-6), 137.19 (C-1'), 146.38 (C-4), 156.01 (NHCO), 167.27 (C-3), 168.78 (C-1), 170.06 (C-2'), 172.78 (C-6'); **HPLC** (95% H<sub>2</sub>O (with 0.1% TFA) to 95% MeCN in 10 min, then 95% MeCN for 4 min),  $t_R = 5.86$  min, 99% purity, detection at 210 nm; **HRMS** (ESI)  $m/z$  [M – H]<sup>–</sup> calcd for C<sub>31</sub>H<sub>38</sub>N<sub>4</sub>O<sub>9</sub>, 609.2555; found, 609.2556.

## 2. Protected carboxy linkers:

### *tert*-Butyl 4-(benzyloxycarbonylamino)butanoate (**31**)

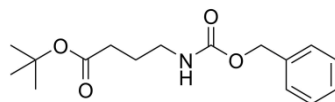

Cbz- $\gamma$ -Abu-OH (**30**, 2.37 g, 10 mmol) was dissolved in dry CH<sub>2</sub>Cl<sub>2</sub> and DMAP (0.12 g, 1 mmol) and *t*BuOH (3.71 g, 4.7 mL, 50 mmol) were added. After stirring at 0 °C for 5 min, DCC (2.27 g, 11 mmol) was added. The resulting mixture was stirred for 18 h at rt, after which the precipitate was filtered and it was washed with CH<sub>2</sub>Cl<sub>2</sub> (25 mL). The filtrate was washed with H<sub>2</sub>O (50 mL) and extracted once again with CH<sub>2</sub>Cl<sub>2</sub> (50 mL). The combined organic layers were washed with brine (50 mL), dried over Na<sub>2</sub>SO<sub>4</sub>, filtered and concentrated *in vacuo* to give a colorless oil which was further purified by column chromatography (CH<sub>2</sub>Cl<sub>2</sub>).

Yield (1.36 g, 46%);  $R_f$  = 0.31 (CH<sub>2</sub>Cl<sub>2</sub>); <sup>1</sup>H NMR (500 MHz, DMSO-*d*<sub>6</sub>)  $\delta$  1.38 (s, 9H, CH<sub>3</sub>), 1.56 – 1.65 (m, 2H), 2.14 – 2.21 (m, 2H, CH<sub>2</sub>), 2.99 (q,  $J$  = 6.6 Hz, 2H, NHCH<sub>2</sub>), 4.99 (s, 2H, OCH<sub>2</sub>), 7.18 – 7.25 (m, 1H, NH), 7.26 – 7.39 (m, 5H, Ar-H); <sup>13</sup>C NMR (126 MHz, DMSO-*d*<sub>6</sub>)  $\delta$  25.12 (CH<sub>2</sub>), 27.91 (CH<sub>3</sub>), 32.24 (CH<sub>2</sub>), 65.31 (OCH<sub>2</sub>), 79.68 (C(CH<sub>3</sub>)<sub>3</sub>), 127.85, 127.89, 128.48 (C-2, C-3, C-4), 137.41 (C-1), 156.28, 172.10 (CO); LC-MS (ESI) (90% H<sub>2</sub>O to 100% MeOH in 10 min, then 100% MeOH to 20 min, DAD 200-400 nm),  $t_R$  = 11.02 min, 99% purity,  $m/z$  [M + H]<sup>+</sup> calcd for C<sub>16</sub>H<sub>23</sub>NO<sub>4</sub>, 294.17; found, 294.0.

### *tert*-Butyl 6-(benzyloxycarbonylamino)hexanoate (**33**)

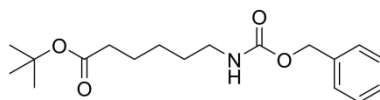

This compound was synthesized in analogy to compound **31**. *N*-Carbobenzyoxy-6-aminohexanoic acid (**32**, 2.65 g, 10 mmol) was used as starting material to give a colorless oil.

Yield (1.45 g, 45%);  $R_f = 0.22$  ( $\text{CH}_2\text{Cl}_2$ );  $^1\text{H NMR}$  (500 MHz,  $\text{DMSO-}d_6$ )  $\delta$  1.18 – 1.28 (m, 2H,  $\text{CH}_2$ ), 1.32 – 1.52 (m, 13H,  $\text{CH}_2$ ,  $\text{CH}_3$ ), 2.11 – 2.18 (m, 2H,  $\text{CH}_2$ ), 2.92 – 3.00 (m, 2H,  $\text{NHCH}_2$ ), 4.99 (s, 2H,  $\text{OCH}_2$ ), 7.18 (t,  $J = 5.7$  Hz, 1H, NH), 7.23 – 7.41 (m, 5H, Ar-H);  $^{13}\text{C NMR}$  (126 MHz,  $\text{DMSO-}d_6$ )  $\delta$  25.77, 27.92 ( $\text{CH}_3$ ), 29.20, 34.87, 40.25, 65.22 ( $\text{OCH}_2$ ), 79.51 ( $\text{C}(\text{CH}_3)_3$ ), 127.82, 127.86, 128.47 (C-2, C-3, C-4), 137.46 (C-1), 156.24, 172.37 (CO); **LC-MS** (ESI) (90%  $\text{H}_2\text{O}$  to 100% MeOH in 10 min, then 100% MeOH to 20 min, DAD 200–400 nm),  $t_R = 11.49$  min, 96% purity,  $m/z$   $[\text{M} + \text{H}]^+$  calcd for  $\text{C}_{18}\text{H}_{27}\text{NO}_4$ , 322.20; found, 322.0.

### ***tert*-Butyl hemisuccinate (**34**)<sup>15</sup>**

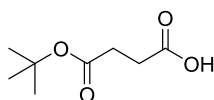

This compound was synthesized similar to a previously reported procedure.<sup>15</sup> In brief, to a suspension of succinic anhydride (10.00 g, 100 mmol), *N*-hydroxysuccinimide (3.45 g, 30 mmol) and DMAP (1.22 g, 10 mmol) in dry toluene (50 mL) was added  $\text{Et}_3\text{N}$  (3.04 g, 4.16 mL, 30 mmol) and *t*BuOH (9.64 g, 12.20 mL, 130 mmol). The mixture was stirred at reflux for 24 h. Subsequently, the dark mixture was diluted with EtOAc (50 mL) and it was washed with 10% citric acid solution (50 mL) and brine (50 mL), dried over  $\text{Na}_2\text{SO}_4$ , filtered and concentrated *in vacuo*. The brownish oil was triturated with a hot mixture of  $\text{Et}_2\text{O}$  and *n*-hexanes 3:1 (100 mL) and it was filtered. The filtrate was allowed to cool down to rt, filtered again and it was further stored at  $-18$  °C overnight to give colorless crystals.

Yield (7.85 g, 45%); mp 44 – 46 °C, lit. mp 44 – 45 °C;  $^1\text{H NMR}$  (600 MHz,  $\text{DMSO-}d_6$ )  $\delta$  1.37 (s, 9H,  $\text{CH}_3$ ), 2.35 – 2.43 (m, 4H,  $\text{CH}_2$ ), 12.11 (br s, 1H, COOH);  $^{13}\text{C NMR}$  (151 MHz,  $\text{DMSO-}d_6$ )  $\delta$  27.89 ( $\text{C}(\text{CH}_3)_3$ ), 28.99, 30.04 ( $\text{CH}_2$ ), 79.85 ( $\text{C}(\text{CH}_3)_3$ ), 171.49, 173.58 (CO); **LC-MS** (ESI) (90%  $\text{H}_2\text{O}$  to 100% MeOH in 10 min, then 100% MeOH to 20 min),  $t_R = 0.66$  min,  $m/z$   $[\text{M} + \text{H}]^+$  calcd for  $\text{C}_8\text{H}_{14}\text{O}_4$ , 175.09; found, 175.1.

### ***tert*-Butyl 4-[2-[2-[2-(benzyloxycarbonylamino)ethoxy]ethoxy]ethylamino]-4-oxo-butanoate (**35**)**

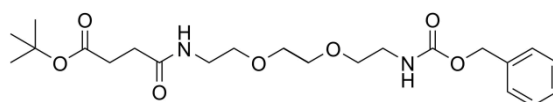

To a solution of **34** (0.52 g, 3 mmol) in dry DMF (3 mL) was added *N*-hydroxysuccinimide (0.33 g, 2.9 mmol) with stirring at rt. Subsequently, DCC (0.60 g, 2.9 mmol) was added to the mixture. After stirring for 3 h at rt, the suspension was filtered and it was washed with dry DMF (5 mL). The filtrate was added to a solution of **20** (0.57 g, 2 mmol) and DIPEA (0.78 g, 1.05 mL, 6 mmol) in dry DMF (5 mL). The resulting



reaction mixture was stirred for another 3 h at rt. Then, it was diluted with EtOAc (50 mL) and the mixture was washed with 10% KHSO<sub>4</sub>, H<sub>2</sub>O, and brine (each 25 mL), dried over Na<sub>2</sub>SO<sub>4</sub>, filtered and concentrated *in vacuo* to give a colorless oil which was further purified by column chromatography (gradient of petroleum ether/EtOAc 1:2 to EtOAc).

Yield (0.53 g, 60%); *R<sub>f</sub>* = 0.37 (EtOAc); <sup>1</sup>H NMR (600 MHz, DMSO-*d*<sub>6</sub>) δ 1.36 (s, 9H, CH<sub>3</sub>), 2.28 (t, *J* = 6.9 Hz, 2H), 2.36 (t, *J* = 6.6 Hz, 2H, CH<sub>2</sub>), 3.10 – 3.20 (m, 4H), 3.36 – 3.42 (m, 4H), 3.46 – 3.51 (m, 4H, OCH<sub>2</sub>, NHCH<sub>2</sub>), 5.00 (s, 2H, OCH<sub>2</sub>), 7.22 (t, *J* = 5.6 Hz, 1H, NH), 7.26 – 7.38 (m, 5H, Ar-H), 7.85 (t, *J* = 5.6 Hz, 1H, NH); <sup>13</sup>C NMR (151 MHz, DMSO-*d*<sub>6</sub>) δ 27.93 (CH<sub>3</sub>), 30.20, 30.44 (CH<sub>2</sub>), 38.77 (NHCH<sub>2</sub>), 65.41 (OCH<sub>2</sub>), 69.30 (2 × OCH<sub>2</sub>), 69.68, 69.71 (OCH<sub>2</sub>), 79.70 (C(CH<sub>3</sub>)<sub>3</sub>), 127.90, 127.94, 128.53 (C-2, C-3, C-4), 137.38 (C-1), 156.37, 171.08, 171.77 (CO). One signal for NHCH<sub>2</sub> is missing (overlapping solvent peaks); LC-MS (ESI) (90% H<sub>2</sub>O to 100% MeOH in 10 min, then 100% MeOH to 20 min, DAD 200-400 nm), *t<sub>R</sub>* = 10.61 min, 99% purity, *m/z* [M + H]<sup>+</sup> calcd for C<sub>22</sub>H<sub>34</sub>N<sub>2</sub>O<sub>7</sub>, 439.24; found, 439.1; HRMS (ESI) *m/z* [M + H]<sup>+</sup> calcd for C<sub>22</sub>H<sub>34</sub>N<sub>2</sub>O<sub>7</sub>, 439.2439; found, 439.2434.

***tert*-Butyl 4-[3-[4-[3-(benzyloxycarbonylamino)propoxy]butoxy]propylamino]-4-oxo-butanoate (36)**

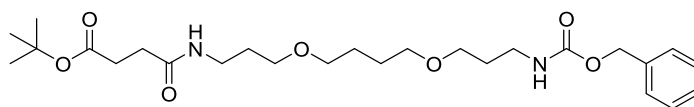

To a solution of **34** (2.61 g, 15 mmol) in dry DMF (15 mL) was added *N*-hydroxysuccinimide (1.67 g, 14.5 mmol) with stirring at rt. Subsequently, DCC (2.99 g, 14.5 mmol) was added to the mixture. After stirring for 3 h at rt, the suspension was filtered and it was washed with dry DMF (5 mL). The filtrate was added to a solution of **27** (3.38 g, 10 mmol) and DIPEA (3.88 g, 5.1 mL, 30 mmol) in dry DMF (10 mL). The resulting reaction mixture was stirred for another 3 h at rt. Then, it was diluted with EtOAc (250 mL) and the mixture was washed with 10% KHSO<sub>4</sub>, H<sub>2</sub>O, and brine (each 125 mL), dried over Na<sub>2</sub>SO<sub>4</sub>, filtered and concentrated *in vacuo* to give a colorless oil which was further purified by column chromatography (gradient of petroleum ether/EtOAc 1:2 to EtOAc).

Yield (3.71 g, 75%);  $R_f = 0.51$  (EtOAc);  $^1\text{H NMR}$  (600 MHz, DMSO- $d_6$ )  $\delta$  1.36 (s, 9H, CH<sub>3</sub>), 1.47 – 1.52 (m, 4H), 1.55 – 1.65 (m, 4H), 2.25 (t,  $J = 6.9$  Hz, 2H), 2.37 (t,  $J = 6.9$  Hz, 2H, CH<sub>2</sub>), 3.00 – 3.08 (m, 4H), 3.31 – 3.35 (m, 8H, OCH<sub>2</sub>, NHCH<sub>2</sub>), 4.99 (s, 2H, OCH<sub>2</sub>), 7.19 (t,  $J = 5.8$  Hz, 1H, NH), 7.26 – 7.38 (m, 5H, Ar-H), 7.76 (t,  $J = 5.6$  Hz, 1H, NH);  $^{13}\text{C NMR}$  (151 MHz, DMSO- $d_6$ )  $\delta$  26.17 (2 × CH<sub>2</sub>), 27.87 (C(CH<sub>3</sub>)<sub>3</sub>), 29.58, 30.24, 30.44, 30.81 (CH<sub>2</sub>), 35.96, 37.79 (NHCH<sub>2</sub>), 65.24, 67.64, 67.78, 69.95, 69.96 (OCH<sub>2</sub>), 79.61 (C(CH<sub>3</sub>)<sub>3</sub>), 127.84, 127.87, 128.47 (C-2, C-3, C-4), 137.43 (C-1), 156.22, 170.75, 171.74 (CO); **LC-MS** (ESI) (90% H<sub>2</sub>O to 100% MeCN in 10 min, then 100% MeCN to 20 min, DAD 200-400 nm),  $t_R = 9.79$  min, 99% purity,  $m/z$  [M + H]<sup>+</sup> calcd for C<sub>26</sub>H<sub>42</sub>N<sub>2</sub>O<sub>7</sub>, 495.30; found, 495.2; **HRMS** (ESI)  $m/z$  [M + H]<sup>+</sup> calcd for C<sub>26</sub>H<sub>42</sub>N<sub>2</sub>O<sub>7</sub>, 495.3065; found, 495.3021.

### Protected carboxy tool compound 2a

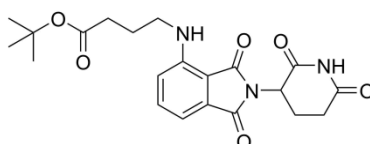

This compound was prepared using the General Procedure **X** and linker **31** (0.59 g, 2 mmol). The crude product was purified by column chromatography (petroleum ether/EtOAc 1:1) to obtain a green oil.

Yield (0.38 g, 46%);  $R_f = 0.45$  (petroleum ether/EtOAc 1:1);  $^1\text{H NMR}$  (600 MHz, DMSO- $d_6$ ) 1.38 (s, 9H, CH<sub>3</sub>), 1.73 – 1.81 (m, 2H, CH<sub>2</sub>), 1.97 – 2.05 (m, 1H, 4'-H), 2.28 (t,  $J = 7.2$  Hz, 2H, CH<sub>2</sub>), 2.50 – 2.62 (m, 2H, 4'-H, 5'-H), 2.83 – 2.92 (m, 1H, 5'-H), 3.27 – 3.34 (m, 2H, NHCH<sub>2</sub>), 5.04 (dd,  $J = 5.4, 12.8$  Hz, 1H, 3'-H), 6.62 (t,  $J = 6.2$  Hz, 1H, NHCH<sub>2</sub>), 7.01 (d,  $J = 7.0$  Hz, 1H), 7.10 (d,  $J = 8.6$  Hz, 1H, 5-H, 7-H), 7.57 (dd,  $J = 7.1, 8.5$  Hz, 1H, 6-H), 11.06 (br s, 1H, NH);  $^{13}\text{C NMR}$  (151 MHz, DMSO- $d_6$ )  $\delta$  22.31 (C-4'), 24.35 (CH<sub>2</sub>), 27.91 (C(CH<sub>3</sub>)<sub>3</sub>), 31.13 (C-5'), 32.19 (CH<sub>2</sub>), 41.30 (NHCH<sub>2</sub>), 48.70 (C-3'), 79.87 (C(CH<sub>3</sub>)<sub>3</sub>), 109.35 (C-3a), 110.61 (C-7), 117.25 (C-5), 132.41 (C-7a), 136.39 (C-6), 146.47 (C-4), 167.44 (C-1), 168.97 (C-3), 170.20 (C-2'), 172.10, 172.93 (C-6', CO); **LC-MS** (ESI) (90% H<sub>2</sub>O to 100% MeOH in 10 min, then 100% MeOH to 20 min, DAD 220-500 nm),  $t_R = 10.77$  min, 98% purity,  $m/z$  [M + H]<sup>+</sup> calcd for C<sub>21</sub>H<sub>25</sub>N<sub>3</sub>O<sub>6</sub>, 416.18; found, 416.0; **HRMS**(ESI)  $m/z$  [M + H]<sup>+</sup> calcd for C<sub>21</sub>H<sub>25</sub>N<sub>3</sub>O<sub>6</sub>, 416.1816; found, 416.1814.

### Protected carboxy tool compound 2b

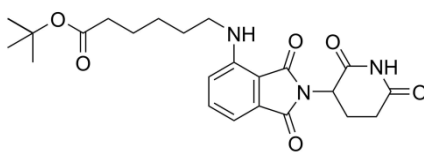

This compound was prepared using the General Procedure **X** and linker **33** (0.64 g, 2 mmol). The crude product was purified by column chromatography (gradient of petroleum ether/EtOAc 4:1 to 1:1) to obtain a yellow oil.

Yield (0.38 g, 43%);  $R_f = 0.28$  (petroleum ether/EtOAc 2:1);  $^1\text{H NMR}$  (600 MHz, DMSO- $d_6$ )  $\delta$  1.29 – 1.39 (m, 11H, CH<sub>2</sub>, CH<sub>3</sub>), 1.46 – 1.60 (m, 4H, CH<sub>2</sub>), 1.97 – 2.05 (m, 1H, 4'-H), 2.18 (t,  $J = 7.3$  Hz, 2H, CH<sub>2</sub>), 2.45 – 2.62 (m, 2H, 4'-H, 5'-H), 2.82 – 2.92 (m, 1H, 5'-H), 3.28 (q,  $J = 6.7$  Hz, 2H, NHCH<sub>2</sub>), 5.03 (dd,  $J = 5.5, 12.8$  Hz, 1H, 3'-H), 6.51 (t,  $J = 6.0$  Hz, 1H, NHCH<sub>2</sub>), 7.01 (d,  $J = 7.1$  Hz, 1H), 7.08 (d,  $J = 8.6$  Hz, 1H, 5-H, 7-H), 7.56 (dd,  $J = 7.1, 8.5$  Hz, 1H, 6-H), 11.06 (br s, 1H, NH);  $^{13}\text{C NMR}$  (151 MHz, DMSO- $d_6$ )  $\delta$  22.33 (C-4'), 24.53, 25.86 (CH<sub>2</sub>), 27.91 (C(CH<sub>3</sub>)<sub>3</sub>), 28.54 (CH<sub>2</sub>), 31.14 (C-5'), 34.85 (CH<sub>2</sub>), 41.85 (NHCH<sub>2</sub>), 48.71 (C-3'), 79.56 (C(CH<sub>3</sub>)<sub>3</sub>), 109.20 (C-3a), 110.54 (C-7), 117.35 (C-5), 132.36 (C-7a), 136.43 (C-6), 146.59 (C-4), 167.47 (C-1), 169.09 (C-3), 170.21 (C-2'), 172.38, 172.95 (C-6', CO); **LC-MS** (ESI) (90% H<sub>2</sub>O to 100% MeCN in 10 min, then 100% MeCN to 20 min, DAD 220-500 nm),  $t_R = 9.64$  min, 96% purity,  $m/z$  [M + H]<sup>+</sup> calcd for C<sub>23</sub>H<sub>29</sub>N<sub>3</sub>O<sub>6</sub>, 444.21; found, 444.1; **HRMS**(ESI)  $m/z$  [M + H]<sup>+</sup> calcd for C<sub>23</sub>H<sub>29</sub>N<sub>3</sub>O<sub>6</sub>, 444.2129; found, 444.2123.

### Protected carboxy tool compound 2c

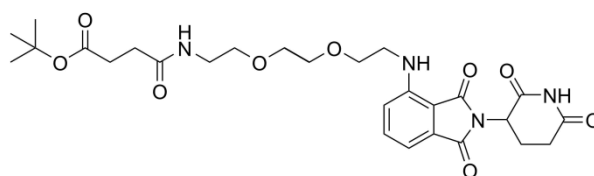

This compound was prepared using the General Procedure **X** and linker **35** (0.44 g, 1 mmol). The crude product was purified by column chromatography (gradient of petroleum ether/EtOAc 1:1 to EtOAc) to obtain a yellow oil.

Yield (0.25 g, 45%);  $R_f = 0.31$  (EtOAc);  $^1\text{H NMR}$  (600 MHz, DMSO- $d_6$ ) 1.36 (s, 9H, CH<sub>3</sub>), 1.98 – 2.05 (m, 1H, 4'-H), 2.27 (t,  $J = 6.9$  Hz, 2H), 2.36 (t,  $J = 7.1$  Hz, 2H, CH<sub>2</sub>), 2.50 – 2.62 (m, 2H, 4'-H, 5'-H), 2.82 – 2.92 (m, 1H, 5'-H), 3.17 (q,  $J = 5.9$  Hz, 2H, NHCH<sub>2</sub>), 3.38 (t,  $J = 5.9$  Hz, 2H), 3.43 – 3.53 (m, 4H), 3.53 – 3.58 (m, 2H, OCH<sub>2</sub>), 3.61 (t,  $J = 5.5$  Hz, 2H, NHCH<sub>2</sub>), 5.04 (dd,  $J = 5.5, 12.8$  Hz, 1H, 3'-H), 6.59 (t,  $J = 5.8$  Hz, 1H, NHCH<sub>2</sub>), 7.03 (d,  $J = 7.0$  Hz, 1H), 7.13 (d,  $J = 8.6$  Hz, 1H, 5-H, 7-H), 7.57 (dd,  $J = 7.1, 8.5$  Hz, 1H, 6-H), 7.83 (t,  $J = 5.7$  Hz, 1H, NHCH<sub>2</sub>), 11.06 (br s, 1H, NH);  $^{13}\text{C NMR}$  (151 MHz, DMSO- $d_6$ )  $\delta$  22.29 (C-4'), 27.89 (C(CH<sub>3</sub>)<sub>3</sub>), 30.16, 30.40 (CH<sub>2</sub>), 31.13 (C-5'), 38.73, 41.87 (NHCH<sub>2</sub>), 48.72 (C-3'), 69.05, 69.33, 69.74, 69.83 (OCH<sub>2</sub>), 79.63 (C(CH<sub>3</sub>)<sub>3</sub>), 109.43 (C-3a), 110.83 (C-7), 117.59 (C-5), 132.26 (C-7a), 136.37 (C-6), 146.57 (C-4), 167.43 (C-1), 169.09 (C-3), 170.20 (C-2'), 170.99, 171.73, 172.92 (C-6', CO); **LC-MS** (ESI) (90% H<sub>2</sub>O to 100% MeOH in 10 min, then 100% MeOH to 20 min, DAD 220-400 nm),  $t_R = 10.13$  min, 99% purity,  $m/z$  [M + H]<sup>+</sup> calcd for C<sub>27</sub>H<sub>36</sub>N<sub>4</sub>O<sub>9</sub>, 561.251; found, 561.2; **HRMS**(ESI)  $m/z$  [M + H]<sup>+</sup> calcd for C<sub>27</sub>H<sub>36</sub>N<sub>4</sub>O<sub>9</sub>, 561.2555; found, 561.2549.

#### Protected carboxy tool compound 2d

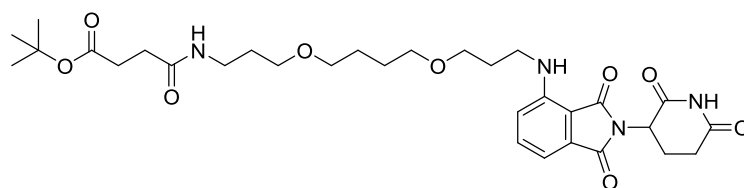

This compound was prepared using the General Procedure **X** and linker **36** (0.99 g, 2 mmol). The crude product was purified by column chromatography (gradient of CH<sub>2</sub>Cl<sub>2</sub>/EtOH 39:1 to 19:1) to obtain a yellow oil.

Yield (0.32 g, 26%);  $R_f = 0.17$  (CH<sub>2</sub>Cl<sub>2</sub>/EtOH 19:1);  $^1\text{H NMR}$  (600 MHz, DMSO- $d_6$ )  $\delta$  1.36 (s, 9H, CH<sub>3</sub>), 1.47 – 1.62 (m, 6H), 1.76 – 1.83 (m, 2H, CH<sub>2</sub>), 1.98 – 2.05 (m, 1H, 4'-H), 2.25 (t,  $J = 7.0$  Hz, 2H), 2.37 (t,  $J = 7.0$  Hz, 2H, CH<sub>2</sub>), 2.46 – 2.61 (m, 2H, 4'-H, 5'-H), 2.83 – 2.92 (m, 1H, 5'-H), 3.02 – 3.08 (m, 2H, NHCH<sub>2</sub>), 3.29 – 3.38 (m, 8H, OCH<sub>2</sub>), 3.44 (t,  $J = 5.9$  Hz, 2H, NHCH<sub>2</sub>), 5.03 (dd,  $J = 5.4, 12.8$  Hz, 1H, 3'-H), 6.63 (t,  $J = 5.9$  Hz, 1H, NHCH<sub>2</sub>), 7.01 (d,  $J = 7.0$  Hz, 1H), 7.08 (d,  $J = 8.6$  Hz, 1H, 5-H, 7-H), 7.57 (dd,  $J = 7.0, 8.5$  Hz, 1H, 6-H), 7.75 (t,  $J = 5.6$  Hz, 1H, NHCH<sub>2</sub>), 11.06 (br s, 1H, NH);  $^{13}\text{C NMR}$  (151 MHz, DMSO- $d_6$ )  $\delta$  22.32 (C-4'), 26.14, 26.22 (CH<sub>2</sub>), 27.89 (C(CH<sub>3</sub>)<sub>3</sub>), 29.06, 29.61, 30.27, 30.46 (CH<sub>2</sub>), 31.14 (C-5'), 36.00 (CH<sub>2</sub>), 48.71 (C-3'), 67.80, 68.02, 70.00, 70.21 (OCH<sub>2</sub>), 79.63 (C(CH<sub>3</sub>)<sub>3</sub>), 109.28 (C-3a), 110.54 (C-7), 117.20 (C-5), 132.38 (C-7a), 136.41 (C-6), 146.60 (C-4), 167.48 (C-1), 169.01 (C-3), 170.22 (C-2'), 170.78, 171.77, 172.94 (C-6', CO); **LC-MS** (ESI) (90% H<sub>2</sub>O to 100% MeCN in 10 min, then 100% MeCN to 20 min, DAD 220-500 nm),  $t_R = 8.54$  min, 99% purity,  $m/z$  [M + H]<sup>+</sup> calcd for C<sub>31</sub>H<sub>44</sub>N<sub>4</sub>O<sub>9</sub>, 617.31; found, 617.3; **HRMS**(ESI)  $m/z$  [M + H]<sup>+</sup> calcd for C<sub>31</sub>H<sub>44</sub>N<sub>4</sub>O<sub>9</sub>, 617.3181; found, 617.3153.

### 3. Alkyne linkers:

#### ***tert*-Butyl (5-hydroxypentyl)carbamate (37)**

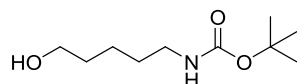

This compound was prepared using the General Procedure I and 5-amino-1-pentanol (1.03 g, 10 mmol). The crude product was purified by column chromatography (gradient of petroleum ether/EtOAc 2:1 to 1:1) to give a colorless oil.

Yield (1.73 g, 85%);  $R_f$  = 0.26 (petroleum ether/EtOAc 2:1);  $^1\text{H NMR}$  (500 MHz, DMSO- $d_6$ )  $\delta$  1.18 – 1.28 (m, 2H, CH<sub>2</sub>), 1.30 – 1.43 (m, 13H, CH<sub>2</sub>, CH<sub>3</sub>), 2.84 – 2.92 (m, 2H, CH<sub>2</sub>), 3.32 – 3.39 (m, 2H, CH<sub>2</sub>), 4.28 (t,  $J$  = 5.1 Hz, 1H, NH), 6.60 – 6.77 (m, 1H, OH);  $^{13}\text{C NMR}$  (126 MHz, DMSO- $d_6$ )  $\delta$  22.93 (CH<sub>2</sub>), 28.40 (CH<sub>3</sub>), 29.49, 32.32 (CH<sub>2</sub>), 60.77 (OCH<sub>2</sub>), 77.38 (C(CH<sub>3</sub>)<sub>3</sub>), 155.69 (CO). The signal for NHCH<sub>2</sub> is missing (overlapping solvent peaks); **LC-MS** (ESI) (90% H<sub>2</sub>O to 100% MeCN in 10 min, then 100% MeCN to 20 min),  $t_R$  = 6.19 min,  $m/z$  [M + H]<sup>+</sup> calcd for C<sub>10</sub>H<sub>21</sub>NO<sub>3</sub>, 204.16; found, 204.1.

#### **Ethyl 2-[2-[2-(*tert*-butoxycarbonylamino)ethoxy]ethoxy]acetate (38)**

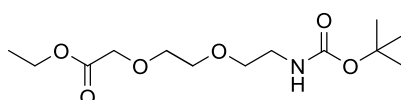

Compound **11** (4.11 g, 20 mmol) was dissolved in dry THF (10 mL) and it was cooled to 0 °C. A mixture of potassium *tert*-butoxide (3.37 g, 30 mmol) in dry THF (60 mL) was added. The reaction mixture was stirred for 30 min at 0 °C, after which ethyl bromoacetate (6.68 g, 4.42 mL, 40 mmol) was added. Stirring of the yellow suspension was continued for 3 h at 0 °C and for 15 h at rt. Subsequently, 10% KHSO<sub>4</sub> solution (10 mL) was added and the organic solvent was evaporated. It was further diluted with H<sub>2</sub>O (100 mL) and then extracted with CH<sub>2</sub>Cl<sub>2</sub> (3 × 50 mL). The combined organic layers were washed with brine (50 mL), dried over Na<sub>2</sub>SO<sub>4</sub>, filtered and evaporated. The residue was purified by column chromatography using petroleum ether/EtOAc 2:1 to obtain a colorless oil.

Yield (2.46 g, 44%);  $R_f$  = 0.38 (CH<sub>2</sub>Cl<sub>2</sub>/acetone 19:1);  $^1\text{H NMR}$  (500 MHz, DMSO- $d_6$ )  $\delta$  1.19 (t,  $J$  = 7.1 Hz, 3H, CH<sub>2</sub>CH<sub>3</sub>), 1.36 (s, 9H, C(CH<sub>3</sub>)<sub>3</sub>), 3.02 – 3.08 (m, 2H, NHCH<sub>2</sub>), 3.35 – 3.39 (m, 2H), 3.49 – 3.53 (m, 2H), 3.56 – 3.59 (m, 2H), 4.07 – 4.14 (m, 4H, OCH<sub>2</sub>), 6.70 (br s, 1H, NH);  $^{13}\text{C NMR}$  (126 MHz, DMSO- $d_6$ )  $\delta$  14.21 (CH<sub>2</sub>CH<sub>3</sub>), 28.37 (C(CH<sub>3</sub>)<sub>3</sub>), 60.22 (CH<sub>2</sub>CH<sub>3</sub>), 67.92, 69.32, 69.60, 70.13 (OCH<sub>2</sub>), 77.72 (C(CH<sub>3</sub>)<sub>3</sub>), 155.73

(CO), 170.26 (CO). The signal for  $\text{NHCH}_2$  is missing (overlapping solvent peaks); **LC-MS** (ESI) (90%  $\text{H}_2\text{O}$  to 100% MeCN in 10 min, then 100% MeCN to 20 min),  $t_R = 7.33$  min,  $m/z$   $[\text{M} + \text{H}]^+$  calcd for  $\text{C}_{13}\text{H}_{25}\text{NO}_6$ , 292.17; found, 292.1.

***tert*-Butyl *N*-[2-[2-(2-hydroxyethoxy)ethoxy]ethyl]carbamate (**39**)**

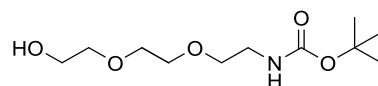

Finely powdered  $\text{NaBH}_4$  (1.97 g, 52 mmol) was added portionwise, over a period of 15 min, to a stirred solution of compound **38** (2.33 g, 8.0 mmol) in THF (40 mL) at reflux. Subsequently, the oil bath was removed and methanol (40 mL) was carefully added dropwise to the stirred suspension over another 15 min. The resulting mixture was left to stir at reflux for a further 60 min. After this time, the colorless solution was allowed to cool to rt before the reaction was quenched with half-saturated  $\text{NH}_4\text{Cl}$  solution (40 mL) and the organic layer was evaporated. The aqueous phase was extracted with  $\text{CH}_2\text{Cl}_2$  (3  $\times$  50 mL), washed with brine (50 mL) and the combined organic layers were dried over  $\text{Na}_2\text{SO}_4$ , filtered and the solvent was evaporated. The crude oil afforded was purified by column chromatography (petroleum ether/EtOAc 1:2) to yield a colorless oil.

Yield (1.22 g, 61%);  $R_f = 0.36$  (EtOAc);  **$^1\text{H NMR}$**  (500 MHz,  $\text{DMSO}-d_6$ )  $\delta$  1.36 (s, 9H,  $\text{CH}_3$ ), 3.01 – 3.08 (m, 2H,  $\text{OCH}_2$ ), 3.35 – 3.42 (m, 4H,  $\text{OCH}_2$ ), 3.45 – 3.51 (m, 6H,  $\text{OCH}_2$ ), 4.52 (t,  $J = 5.4$  Hz, 1H, OH), 6.61 – 6.78 (m, 1H, NH);  **$^{13}\text{C NMR}$**  (126 MHz,  $\text{DMSO}-d_6$ )  $\delta$  28.36 ( $\text{C}(\text{CH}_3)_3$ ), 60.35 ( $\text{CH}_2\text{OH}$ ), 69.30, 69.67, 69.85, 72.47 ( $\text{OCH}_2$ ), 77.71 ( $\text{C}(\text{CH}_3)_3$ ), 155.72 (CO). The signal for  $\text{NHCH}_2$  is missing (overlapping solvent peaks); **LC-MS** (ESI) (90%  $\text{H}_2\text{O}$  to 100% MeCN in 10 min, then 100% MeCN to 20 min),  $t_R = 5.45$  min,  $m/z$   $[\text{M} + \text{H}]^+$  calcd for  $\text{C}_{11}\text{H}_{23}\text{NO}_5$ , 250.16; found, 250.3.

**5-(*tert*-Butoxycarbonylamino)pentyl methanesulfonate (**40**)**

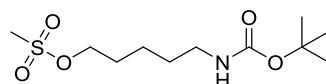

This compound was prepared using the General Procedure II, where compound **37** was 2.03 g, (10 mmol). The crude product was purified by column chromatography (gradient of petroleum ether/EtOAc 4:1 to 2:1) to give a colorless solid.

Yield (2.17 g, 77%); mp 58 –60 °C;  $R_f$  = 0.44 (petroleum ether/EtOAc 2:1);  $^1\text{H NMR}$  (600 MHz, DMSO- $d_6$ )  $\delta$  1.26 – 1.33 (m, 2H, CH<sub>2</sub>), 1.34 – 1.42 (m, 11H, CH<sub>2</sub>, (C(CH<sub>3</sub>)<sub>3</sub>), 1.60 – 1.68 (m, 2H, CH<sub>2</sub>), 2.90 (q,  $J$  = 6.6 Hz, 2H, CH<sub>2</sub>), 3.14 (s, 3H, CH<sub>3</sub>), 4.16 (t,  $J$  = 6.4 Hz, 2H, OCH<sub>2</sub>), 6.76 (s, 1H, NH);  $^{13}\text{C NMR}$  (151 MHz, DMSO- $d_6$ )  $\delta$  22.37, 28.30, 28.40 (C(CH<sub>3</sub>)<sub>3</sub>), 29.01 (CH<sub>2</sub>), 36.67 (CH<sub>3</sub>), 70.54 (OCH<sub>2</sub>), 77.48 (C(CH<sub>3</sub>)<sub>3</sub>), 155.74 (CO). The signal for NHCH<sub>2</sub> is missing (overlapping solvent peaks); **LC-MS** (ESI) (90% H<sub>2</sub>O to 100% MeCN in 10 min, then 100% MeCN to 20 min),  $t_R$  = 7.75 min,  $m/z$  [M + H]<sup>+</sup> calcd for C<sub>11</sub>H<sub>23</sub>NO<sub>5</sub>S, 282.13; found, 282.1.

### 2-[2-[2-(*tert*-Butoxycarbonylamino)ethoxy]ethoxy]ethyl methanesulfonate (41)

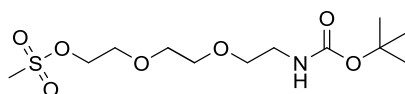

This compound was prepared using the General Procedure II, where compound **39** was 2.49 g (10 mmol). The crude product was purified by column chromatography (gradient of petroleum ether/EtOAc 4:1 to 2:1) to give a colorless solid.

Yield (2.75 g, 84%);  $R_f$  = 0.44 (petroleum ether/EtOAc 1:2);  $^1\text{H NMR}$  (500 MHz, DMSO- $d_6$ )  $\delta$  1.36 (s, 9H, (C(CH<sub>3</sub>)<sub>3</sub>), 3.05 (q,  $J$  = 6.0 Hz, 2H, CH<sub>2</sub>), 3.16 (s, 3H, CH<sub>3</sub>), 3.37 (t,  $J$  = 6.1 Hz, 2H), 3.46 – 3.58 (m, 4H), 3.61 – 3.73 (m, 2H), 4.23 – 4.36 (m, 2H, NHCH<sub>2</sub>, OCH<sub>2</sub>), 6.70 (br s, 1H, NH);  $^{13}\text{C NMR}$  (126 MHz, DMSO- $d_6$ )  $\delta$  28.37 (C(CH<sub>3</sub>)<sub>3</sub>), 37.00 (CH<sub>3</sub>), 68.45, 69.33, 69.59, 69.79, 69.86 (OCH<sub>2</sub>), 77.75 (C(CH<sub>3</sub>)<sub>3</sub>), 155.74 (CO). The signal for NHCH<sub>2</sub> is missing (overlapping solvent peaks); **LC-MS** (ESI) (90% H<sub>2</sub>O to 100% MeOH in 10 min, then 100% MeOH to 20 min),  $t_R$  = 8.84 min,  $m/z$  [M + H]<sup>+</sup> calcd for C<sub>12</sub>H<sub>25</sub>NO<sub>7</sub>S, 328.14; found, 328.0.

### *tert*-Butyl *N*-(5-prop-2-ynoxy)pentyl)carbamate (42)

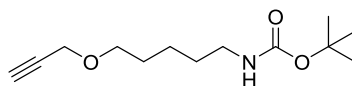

This compound was prepared using the General Procedure VII and compound **40** (2.81 g, 10 mmol). The crude product was purified by column chromatography (petroleum ether/EtOAc 4:1) to give a colorless oil.

Yield (0.94 g, 39%);  $R_f$  = 0.32 (petroleum ether/EtOAc 4:1);  $^1\text{H NMR}$  (500 MHz, DMSO- $d_6$ )  $\delta$  1.18 – 1.30 (m, 2H, CH<sub>2</sub>), 1.31 – 1.41 (m, 11H, CH<sub>2</sub>, CH<sub>3</sub>), 1.43 – 1.52 (m, 2H, CH<sub>2</sub>), 2.76 – 3.00 (m, 2H), 3.32 – 3.43 (m, 3H, NHCH<sub>2</sub>, OCH<sub>2</sub>, CH), 4.07 (d,  $J$  = 2.5 Hz, 2H, OCH<sub>2</sub>), 6.70 (br s, 1H, NH);  $^{13}\text{C NMR}$  (126 MHz, DMSO- $d_6$ )  $\delta$  23.12 (CH<sub>2</sub>), 28.45 (C(CH<sub>3</sub>)<sub>3</sub>), 28.77, 29.40 (CH<sub>2</sub>), 57.43 (CH<sub>2</sub>C≡CH), 69.28 (OCH<sub>2</sub>), 76.93 (C≡CH), 77.49

( $\underline{\text{C}}(\text{CH}_3)_3$ ), 80.73 ( $\underline{\text{C}}\equiv\text{CH}$ ), 155.78 (CO). The signal for  $\text{NH}\underline{\text{C}}\text{H}_2$  is missing (overlapping solvent peaks); **LC-MS** (ESI) (90%  $\text{H}_2\text{O}$  to 100% MeOH in 10 min, then 100% MeOH to 20 min),  $t_{\text{R}} = 10.37$  min,  $m/z$  [ $\text{M} + \text{H}$ ] $^+$  calcd for  $\text{C}_{13}\text{H}_{23}\text{NO}_3$ , 242.17; found, 242.1; **HRMS** (ESI)  $m/z$  [ $\text{M} + \text{Na}$ ] $^+$  calcd for  $\text{C}_{13}\text{H}_{23}\text{NO}_3$ , 264.1570; found, 264.1548.

***tert*-Butyl *N*-[2-(2-prop-2-ynoxyethoxy)ethyl]carbamate (**43**)<sup>8</sup>**

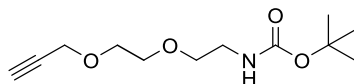

This compound was prepared using the General Procedure **VII** and compound **12** (2.05 g, 10 mmol). The crude product was purified by column chromatography (gradient of petroleum ether/EtOAc 4:1 to 2:1) to give a colorless oil.

Yield (1.53 g, 63%);  $R_f = 0.23$  (petroleum ether/EtOAc 4:1);  $^1\text{H NMR}$  (500 MHz,  $\text{DMSO-}d_6$ )  $\delta$  1.36 (s, 9H,  $\text{CH}_3$ ), 3.05 (q,  $J = 6.0$  Hz, 2H), 3.32 – 3.40 (m, 3H,  $\text{OCH}_2$ , CH), 3.47 – 3.57 (m, 4H), 4.13 (d,  $J = 2.5$  Hz, 2H,  $\text{OCH}_2$ ), 6.71 (br s, 1H, NH);  $^{13}\text{C NMR}$  (126 MHz,  $\text{DMSO-}d_6$ )  $\delta$  28.36 ( $\text{C}(\underline{\text{C}}\text{H}_3)_3$ ), 57.66 ( $\underline{\text{C}}\text{H}_2\text{C}\equiv\text{CH}$ ), 68.63, 69.32, 69.38 ( $\text{OCH}_2$ ), 77.15 ( $\text{C}\equiv\text{CH}$ ), 77.71 ( $\underline{\text{C}}(\text{CH}_3)_3$ ), 80.46 ( $\underline{\text{C}}\equiv\text{CH}$ ), 155.72 (CO). The signal for  $\text{NH}\underline{\text{C}}\text{H}_2$  is missing (overlapping solvent peaks); **LC-MS** (ESI) (90%  $\text{H}_2\text{O}$  to 100% MeCN in 10 min, then 100% MeCN to 20 min),  $t_{\text{R}} = 7.43$  min,  $m/z$  [ $\text{M} + \text{H}$ ] $^+$  calcd for  $\text{C}_{12}\text{H}_{21}\text{NO}_4$ , 244.15; found, 244.2.

***tert*-Butyl *N*-[2-[2-(2-prop-2-ynoxyethoxy)ethoxy]ethyl]carbamate (**44**)**

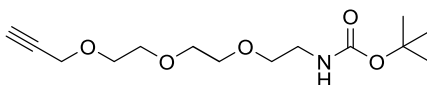

This compound was prepared using the General Procedure **VII** and compound **41** (3.27 g, 10 mmol). The crude product was purified by column chromatography (petroleum ether/EtOAc 2:1) to give a colorless oil.

Yield (1.38 g, 48%);  $R_f = 0.45$  (petroleum ether/EtOAc 1:1);  $^1\text{H NMR}$  (500 MHz,  $\text{DMSO-}d_6$ )  $\delta$  1.36 (s, 9H,  $\text{CH}_3$ ), 3.05 (q,  $J = 6.0$  Hz, 2H), 3.33 – 3.40 (m, 3H,  $\text{OCH}_2$ , CH), 3.46 – 3.51 (m, 4H), 3.51 – 3.57 (m, 4H), 4.13 (d,  $J = 2.4$  Hz, 2H,  $\text{OCH}_2$ ), 6.69 (br s, 1H, NH);  $^{13}\text{C NMR}$  (126 MHz,  $\text{DMSO-}d_6$ )  $\delta$  28.39 ( $\text{C}(\underline{\text{C}}\text{H}_3)_3$ ), 57.66 ( $\underline{\text{C}}\text{H}_2\text{C}\equiv\text{CH}$ ), 68.69, 69.33 ( $\text{OCH}_2$ ), 69.66 ( $2 \times \text{OCH}_2$ ), 69.87 ( $\text{OCH}_2$ ), 77.19 ( $\text{C}\equiv\text{CH}$ ), 77.76 ( $\underline{\text{C}}(\text{CH}_3)_3$ ), 80.49 ( $\underline{\text{C}}\equiv\text{CH}$ ), 155.76 (CO). The signal for  $\text{NH}\underline{\text{C}}\text{H}_2$  is missing (overlapping solvent peaks); **LC-MS** (ESI) (90%  $\text{H}_2\text{O}$



to 100% MeOH in 10 min, then 100% MeOH to 20 min),  $t_R = 9.67$  min,  $m/z$   $[M + H]^+$  calcd for  $C_{14}H_{25}NO_5$ , 288.18; found, 287.8.

**tert-Butyl N-[2-[2-[2-(2-prop-2-ynoxyethoxy)ethoxy]ethoxy]ethyl]carbamate (45)**

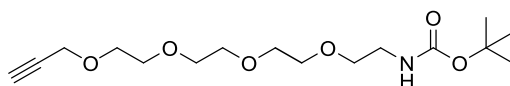

This compound was prepared using the General Procedure VII and compound 23 (3.71 g, 10 mmol). The crude product was purified by column chromatography (gradient of petroleum ether/EtOAc 1:1 to 1:2) to give a colorless oil.

Yield (2.32 g, 70%);  $R_f = 0.45$  (petroleum ether/EtOAc 1:2);  $^1H$  NMR (500 MHz, DMSO- $d_6$ )  $\delta$  1.36 (s, 9H,  $CH_3$ ), 3.05 (q,  $J = 6.0$  Hz, 2H), 3.33 – 3.40 (m, 3H,  $OCH_2$ , CH), 3.42 – 3.59 (m, 12H), 4.12 (d,  $J = 2.5$  Hz, 2H,  $OCH_2$ ), 6.68 (br s, 1H, NH);  $^{13}C$  NMR (126 MHz, DMSO- $d_6$ )  $\delta$  28.41 ( $C(CH_3)_3$ ), 57.67 ( $CH_2C\equiv CH$ ), 68.71, 69.35, 69.68, 69.92 ( $OCH_2$ ), 69.96 (2  $\times$   $OCH_2$ ), 77.18 ( $C\equiv CH$ ), 77.79 ( $C(CH_3)_3$ ), 80.52 ( $C\equiv CH$ ), 155.79 (CO). The signal for  $NHCH_2$  is missing (overlapping solvent peaks); LC-MS (ESI) (90%  $H_2O$  to 100% MeOH in 10 min, then 100% MeOH to 20 min),  $t_R = 9.71$  min,  $m/z$   $[M + H]^+$  calcd for  $C_{16}H_{29}NO_6$ , 332.20; found, 332.8; HRMS (ESI)  $m/z$   $[M + K]^+$  calcd for  $C_{16}H_{29}NO_6$ , 370.1626; found, 370.1612.

**Alkyne tool compound 3a**

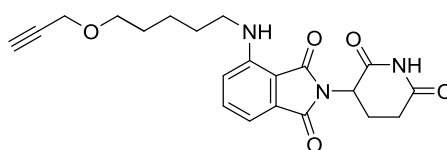

This compound was prepared using the General Procedure IX and compound 42 (0.24 g, 1 mmol). The crude product was purified by column chromatography (petroleum ether/EtOAc 2:1) to give a yellow oil.

Yield (0.21 g, 52%);  $R_f = 0.47$  (petroleum ether/EtOAc 1:1);  $^1H$  NMR (500 MHz, DMSO- $d_6$ )  $\delta$  1.32 – 1.44 (m, 2H), 1.50 – 1.63 (m, 4H,  $CH_2$ ), 1.95 – 2.08 (m, 1H, 4'-H), 2.46 – 2.65 (m, 2H, 4'-H, 5'-H), 2.72 – 3.02 (m, 1H, 5'-H), 3.12 – 3.49 (m, 5H,  $OCH_2$ ,  $NHCH_2$ , CH), 4.09 (d,  $J = 2.5$  Hz, 2H,  $OCH_2$ ), 5.03 (dd,  $J = 5.5$ , 12.7 Hz, 1H, 3'-H), 6.51 (t,  $J = 6.0$  Hz, 1H,  $NHCH_2$ ), 7.01 (d,  $J = 7.0$  Hz, 1H), 7.08 (d,  $J = 8.5$  Hz, 1H, 5-H, 7-H), 7.57 (dd,  $J = 7.1$ , 8.6 Hz, 1H, 6-H), 11.05 (br s, 1H, NH);  $^{13}C$  NMR (126 MHz, DMSO- $d_6$ )  $\delta$  22.31 (C-4'), 23.21, 28.62, 28.76 ( $CH_2$ ), 31.13 (C-5'), 41.95 ( $NHCH_2$ ), 48.72 (C-3'), 57.44 ( $CH_2C\equiv CH$ ), 69.18 ( $OCH_2$ ), 76.95 ( $C\equiv CH$ ), 80.72 ( $C\equiv CH$ ), 109.21 (C-3a), 110.53 (C-7), 117.35 (C-5), 132.36 (C-7a), 136.43 (C-6), 146.61

(C-4), 167.46 (C-1), 169.11 (C-3), 170.21 (C-2'), 172.93 (C-6'); **LC-MS** (ESI) (90% H<sub>2</sub>O to 100% MeOH in 10 min, then 100% MeOH to 20 min, DAD 220-500 nm),  $t_R = 10.47$  min, 97% purity,  $m/z$  [M + H]<sup>+</sup> calcd for C<sub>21</sub>H<sub>23</sub>N<sub>3</sub>O<sub>5</sub>, 398.17; found, 397.9; **HRMS** (ESI)  $m/z$  [M + H]<sup>+</sup> calcd for C<sub>21</sub>H<sub>23</sub>N<sub>3</sub>O<sub>5</sub>, 398.1710; found, 398.1723.

### Alkyne tool compound 3b

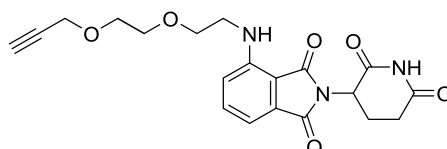

This compound was prepared using the General Procedure **IX** and compound **43** (0.24 g, 1 mmol). The crude product was purified by column chromatography (gradient of petroleum ether/EtOAc 2:1 to 1:2) to give a yellow solid.

Yield (0.22 g, 56%); mp 48 – 50 °C;  $R_f = 0.53$  (petroleum ether/EtOAc 1:2); **<sup>1</sup>H NMR** (500 MHz, DMSO-*d*<sub>6</sub>)  $\delta$  1.89 – 2.17 (m, 1H, 4'-H), 2.51 – 2.73 (m, 2H, 4'-H, 5'-H), 2.73 – 3.01 (m, 1H, 5'-H), 3.34 – 3.39 (m, 1H), 3.46 (q,  $J = 5.6$  Hz, 2H), 3.53 – 3.60 (m, 4H, OCH<sub>2</sub>, CH), 3.61 (t,  $J = 5.5$  Hz, 2H, NHCH<sub>2</sub>), 4.12 (d,  $J = 2.4$  Hz, 2H, OCH<sub>2</sub>), 5.04 (dd,  $J = 5.4, 12.7$  Hz, 1H, 3'-H), 6.58 (t,  $J = 5.9$  Hz, 1H, NHCH<sub>2</sub>), 7.03 (d,  $J = 7.0$  Hz, 1H), 7.13 (d,  $J = 8.6$  Hz, 1H, 5-H, 7-H), 7.57 (dd,  $J = 7.0, 8.5$  Hz, 1H, 6-H), 11.05 (br s, 1H, NH); **<sup>13</sup>C NMR** (126 MHz, DMSO-*d*<sub>6</sub>)  $\delta$  22.33 (C-4'), 31.16 (C-5'), 41.90 (NHCH<sub>2</sub>), 48.76 (C-3'), 57.73 (CH<sub>2</sub>C≡CH), 68.72, 69.10, 69.64 (OCH<sub>2</sub>), 77.21 (C≡CH), 80.51 (C≡CH), 109.48 (C-3a), 110.88 (C-7), 117.64 (C-5), 132.29 (C-7a), 136.42 (C-6), 146.62 (C-4), 167.49 (C-1), 169.12 (C-3), 170.24 (C-2'), 172.98 (C-6'); **LC-MS** (ESI) (90% H<sub>2</sub>O to 100% MeOH in 10 min, then 100% MeOH to 20 min, DAD 220-500 nm),  $t_R = 9.32$  min, 97% purity,  $m/z$  [M + H]<sup>+</sup> calcd for C<sub>20</sub>H<sub>21</sub>N<sub>3</sub>O<sub>6</sub>, 400.15; found, 399.9; **HRMS** (ESI)  $m/z$  [M + H]<sup>+</sup> calcd for C<sub>20</sub>H<sub>21</sub>N<sub>3</sub>O<sub>6</sub>, 400.1503; found, 400.1518.

### Alkyne tool compound 3c

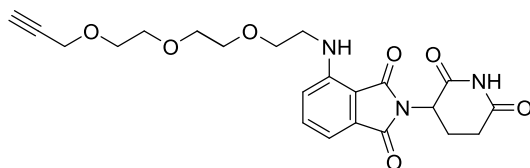

This compound was prepared using the General Procedure **IX** and compound **44** (0.29 g, 1 mmol). The crude product was purified by column chromatography (gradient of petroleum ether/EtOAc 1:1 to 1:2) to give a yellow oil.

Yield (0.21 g, 47%);  $R_f$  = 0.38 (petroleum ether/EtOAc 1:2);  $^1\text{H NMR}$  (500 MHz, DMSO- $d_6$ )  $\delta$  1.90 – 2.14 (m, 1H, 4'-H), 2.45 – 2.66 (m, 2H, 4'-H, 5'-H), 2.72 – 3.00 (m, 1H, 5'-H), 3.35 – 3.68 (m, 13H, OCH<sub>2</sub>, NHCH<sub>2</sub>, CH), 4.11 (d,  $J$  = 2.4 Hz, 2H, OCH<sub>2</sub>), 5.03 (dd,  $J$  = 5.5, 12.7 Hz, 1H, 3'-H), 6.58 (t,  $J$  = 5.9 Hz, 1H, NHCH<sub>2</sub>), 7.03 (d,  $J$  = 7.0 Hz, 1H), 7.13 (d,  $J$  = 8.6 Hz, 1H, 5-H, 7-H), 7.57 (dd,  $J$  = 7.0, 8.5 Hz, 1H, 6-H), 11.05 (br s, 1H, NH);  $^{13}\text{C NMR}$  (126 MHz, DMSO- $d_6$ )  $\delta$  22.31 (C-4'), 31.14 (C-5'), 41.89 (NHCH<sub>2</sub>), 48.75 (C-3'), 57.65 (CH<sub>2</sub>C $\equiv$ CH), 68.71, 69.07, 69.73 (OCH<sub>2</sub>), 69.94 (2  $\times$  OCH<sub>2</sub>), 77.14 (C $\equiv$ CH), 80.51 (C $\equiv$ CH), 109.44 (C-3a), 110.85 (C-7), 117.63 (C-5), 132.27 (C-7a), 136.40 (C-6), 146.61 (C-4), 167.47 (C-1), 169.11 (C-3), 170.21 (C-2'), 172.94 (C-6'); **LC-MS** (ESI) (90% H<sub>2</sub>O to 100% MeOH in 10 min, then 100% MeOH to 20 min, DAD 220-500 nm),  $t_R$  = 9.51 min, 99% purity,  $m/z$  [M + H]<sup>+</sup> calcd for C<sub>22</sub>H<sub>25</sub>N<sub>3</sub>O<sub>7</sub>, 444.17; found, 443.9; **HRMS** (ESI)  $m/z$  [M + H]<sup>+</sup> calcd for C<sub>22</sub>H<sub>25</sub>N<sub>3</sub>O<sub>7</sub>, 444.1765; found, 444.1776.

### Alkyne tool compound 3d

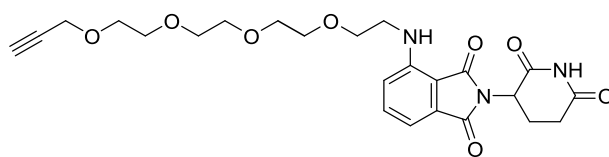

This compound was prepared using the General Procedure **IX** and compound **45** (0.33 g, 1 mmol). The crude product was purified by column chromatography (gradient of petroleum ether/EtOAc 1:1 to EtOAc) to give a yellow oil.

Yield (0.18 g, 36%);  $R_f$  = 0.25 (petroleum ether/EtOAc 1:2);  $^1\text{H NMR}$  (500 MHz, DMSO- $d_6$ )  $\delta$  1.90 – 2.13 (m, 1H, 4'-H), 2.45 – 2.67 (m, 2H, 4'-H, 5'-H), 2.74 – 2.99 (m, 1H, 5'-H), 3.35 – 3.39 (m, 1H, CH), 3.43 – 3.57 (m, 14H, OCH<sub>2</sub>), 3.62 (t,  $J$  = 5.4 Hz, 2H, NHCH<sub>2</sub>), 4.11 (d,  $J$  = 2.4 Hz, 2H, OCH<sub>2</sub>), 5.03 (dd,  $J$  = 5.5, 12.8 Hz, 1H, 3'-H), 6.58 (t,  $J$  = 5.8 Hz, 1H, NHCH<sub>2</sub>), 7.03 (d,  $J$  = 7.0 Hz, 1H), 7.13 (d,  $J$  = 8.6 Hz, 1H, 5-H, 7-H), 7.57 (dd,  $J$  = 7.1, 8.6 Hz, 1H, 6-H), 11.05 (br s, 1H, NH);  $^{13}\text{C NMR}$  (126 MHz, DMSO- $d_6$ )  $\delta$  22.33 (C-4'),

31.15 (C-5'), 41.92 (NHCH<sub>2</sub>), 48.76 (C-3'), 57.66 (CH<sub>2</sub>C≡CH), 68.70, 69.08, 69.67, 69.95 (OCH<sub>2</sub>), 69.97 (2 × OCH<sub>2</sub>), 70.00 (OCH<sub>2</sub>), 77.17 (C≡CH), 80.52 (C≡CH), 109.45 (C-3a), 110.87 (C-7), 117.65 (C-5), 132.28 (C-7a), 136.42 (C-6), 146.63 (C-4), 167.49 (C-1), 169.13 (C-3), 170.22 (C-2'), 172.97 (C-6'); **LC-MS** (ESI) (90% H<sub>2</sub>O to 100% MeOH in 10 min, then 100% MeOH to 20 min, DAD 220-500 nm), *t<sub>R</sub>* = 9.48 min, 99% purity, *m/z* [M + H]<sup>+</sup> calcd for C<sub>24</sub>H<sub>29</sub>N<sub>3</sub>O<sub>8</sub>, 488.20; found, 488.2; **HRMS** (ESI) *m/z* [M + H]<sup>+</sup> calcd for C<sub>24</sub>H<sub>29</sub>N<sub>3</sub>O<sub>8</sub>, 488.2027; found, 488.2011.

## 4. Chloro linkers:

### *tert*-Butyl *N*-[5-(6-chlorohexoxy)pentyl]carbamate (**46**)

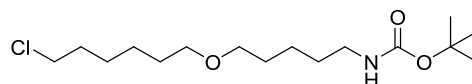

This compound was prepared using the General Procedure **VIII** and compound **37**. The crude product was purified by column chromatography using a gradient of petroleum ether/EtOAc 8:1 to 6:1 to obtain the desired product as a colorless oil.

Yield (0.39 g, 24%);  $R_f = 0.27$  (petroleum ether/EtOAc 8:1);  $^1\text{H NMR}$  (500 MHz, DMSO- $d_6$ )  $\delta$  1.20 – 1.41 (m, 17H, CH<sub>2</sub>, CH<sub>3</sub>), 1.42 – 1.50 (m, 4H), 1.65 – 1.74 (m, 2H, CH<sub>2</sub>), 2.84 – 2.92 (m, 2H, NHCH<sub>2</sub>), 3.14 – 3.45 (m, 4H, OCH<sub>2</sub>), 3.61 (t,  $J = 6.6$  Hz, 2H, CH<sub>2</sub>Cl), 6.70 (t,  $J = 5.6$  Hz, 1H, NH);  $^{13}\text{C NMR}$  (126 MHz, DMSO- $d_6$ )  $\delta$  23.16, 25.12, 26.23 (CH<sub>2</sub>), 28.40 (C(CH<sub>3</sub>)<sub>3</sub>), 29.05, 29.22, 29.43, 32.15 (CH<sub>2</sub>), 45.46 (ClCH<sub>2</sub>), 69.92, 70.02 (OCH<sub>2</sub>), 77.39 (C(CH<sub>3</sub>)<sub>3</sub>), 155.70 (CO); **LC-MS** (ESI) (90% H<sub>2</sub>O to 100% MeCN in 10 min, then 100% MeCN to 20 min),  $t_R = 10.5$  min,  $m/z$  [M + H]<sup>+</sup> calcd for C<sub>16</sub>H<sub>32</sub>ClNO<sub>3</sub>, 322.21; found, 322.2; **HRMS** (ESI)  $m/z$  [M + H]<sup>+</sup> calcd for C<sub>16</sub>H<sub>32</sub>ClNO<sub>3</sub>, 322.2143; found, 322.2116.

### *tert*-butyl *N*-[2-[2-(6-chlorohexoxy)ethoxy]ethyl]carbamate (**47**)

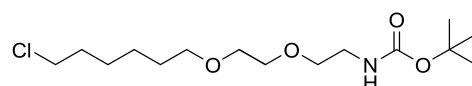

This compound was prepared using the General Procedure **VIII** and compound **11**. The crude product was purified by column chromatography using petroleum ether/EtOAc 4:1 to obtain the desired product as a colorless oil.

Yield (0.73 g, 45%);  $R_f = 0.22$  (petroleum ether /EtOAc 4:1);  $^1\text{H NMR}$  (500 MHz, DMSO- $d_6$ )  $\delta$  1.22 – 1.54 (m, 15H, CH<sub>2</sub>, CH<sub>3</sub>), 1.65 – 1.74 (m, 2H, CH<sub>2</sub>), 3.05 (q,  $J = 6.1$  Hz, 2H, NHCH<sub>2</sub>), 3.33 – 3.40 (m, 4H), 3.42 – 3.51 (m, 4H, OCH<sub>2</sub>), 3.61 (t,  $J = 6.7$  Hz, 2H, CH<sub>2</sub>Cl), 6.68 (br s, 1H, NH);  $^{13}\text{C NMR}$  (126 MHz, DMSO- $d_6$ )  $\delta$  25.05, 26.24 (CH<sub>2</sub>), 28.35 (C(CH<sub>3</sub>)<sub>3</sub>), 29.18, 32.15 (CH<sub>2</sub>), 40.90 (NHCH<sub>2</sub>), 45.45 (CH<sub>2</sub>Cl), 69.29, 69.58, 69.64, 70.31 (OCH<sub>2</sub>), 77.68 (C(CH<sub>3</sub>)<sub>3</sub>), 155.70 (CO); **LC-MS** (ESI) (90% H<sub>2</sub>O to 100% MeOH in 10 min, then 100% MeOH to 20 min),  $t_R = 11.64$  min,  $m/z$  [M + H]<sup>+</sup> calcd for C<sub>15</sub>H<sub>31</sub>ClNO<sub>4</sub>, 324.19; found, 324.1; **HRMS** (ESI)  $m/z$  [M + H]<sup>+</sup> calcd for C<sub>15</sub>H<sub>31</sub>ClNO<sub>4</sub>, 324.1936; found, 324.1928.

**tert-Butyl N-[2-[2-[2-(6-chlorohexoxy)ethoxy]ethoxy]ethyl]carbamate (48)**

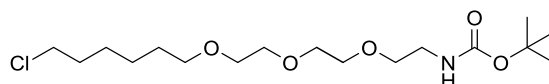

This compound was prepared using the General Procedure **VIII** and compound **39**. The crude product was purified by column chromatography using petroleum ether/EtOAc 1:2 to obtain the desired product as a colorless oil.

Yield (0.40 g, 22%);  $R_f = 0.42$  (petroleum ether/EtOAc 1:1);  $^1\text{H NMR}$  (500 MHz, DMSO- $d_6$ )  $\delta$  1.36 (s, 13H, CH<sub>2</sub>, CH<sub>3</sub>), 1.43 – 1.53 (m, 2H), 1.65 – 1.74 (m, 2H), 3.01 – 3.08 (m, 2H, NHCH<sub>2</sub>), 3.34 – 3.40 (m, 4H), 3.42 – 3.53 (m, 8H, OCH<sub>2</sub>), 3.61 (t,  $J = 6.7$  Hz, 2H, CH<sub>2</sub>Cl), 6.68 (br s, 1H, NH);  $^{13}\text{C NMR}$  (126 MHz, DMSO- $d_6$ )  $\delta$  25.05, 26.24 (CH<sub>2</sub>), 28.36 (C(CH<sub>3</sub>)<sub>3</sub>), 29.18, 32.16 (CH<sub>2</sub>), 45.47 (CH<sub>2</sub>Cl), 69.31, 69.63, 69.67, 69.91, 69.95, 70.32 (OCH<sub>2</sub>), 77.71 (C(CH<sub>3</sub>)<sub>3</sub>), 155.72 (CO); **LC-MS** (ESI) (90% H<sub>2</sub>O to 100% MeOH in 10 min, then 100% MeOH to 20 min),  $t_R = 11.41$  min,  $m/z$  [M + H]<sup>+</sup> calcd for C<sub>17</sub>H<sub>34</sub>ClNO<sub>5</sub>, 368.22; found, 368.2.

**tert-Butyl N-[2-[2-[2-[2-(6-chlorohexoxy)ethoxy]ethoxy]ethoxy]ethyl]carbamate (49)**

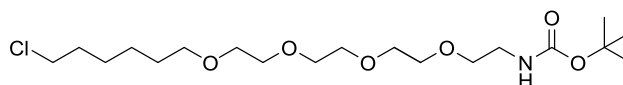

This compound was prepared using the General Procedure **VIII** and compound **22**. The crude product was purified by column chromatography using a gradient of petroleum ether/EtOAc 1:1 to 1:2 to obtain the desired product as a yellow oil.

Yield (0.49 g, 24%);  $R_f = 0.50$  (petroleum ether/EtOAc 1:2);  $^1\text{H NMR}$  (500 MHz, DMSO- $d_6$ )  $\delta$  1.25 – 1.42 (m, 13H), 1.44 – 1.53 (m, 2H), 1.65 – 1.75 (m, 2H), 3.05 (q,  $J = 6.0$  Hz, 2H, NHCH<sub>2</sub>), 3.34 – 3.40 (m, 4H), 3.42 – 3.53 (m, 12H, OCH<sub>2</sub>), 3.61 (t,  $J = 6.6$  Hz, 2H, CH<sub>2</sub>Cl), 6.68 (br s, 1H, NH);  $^{13}\text{C NMR}$  (126 MHz, DMSO- $d_6$ )  $\delta$  25.06, 26.24 (CH<sub>2</sub>), 28.36 (C(CH<sub>3</sub>)<sub>3</sub>), 29.18, 32.16 (CH<sub>2</sub>), 45.47 (CH<sub>2</sub>Cl), 69.31, 69.63, 69.66, 69.89 (OCH<sub>2</sub>), 69.95 (3 × OCH<sub>2</sub>), 70.31 (OCH<sub>2</sub>), 77.70 (C(CH<sub>3</sub>)<sub>3</sub>), 155.72 (CO); **LC-MS** (ESI) (90% H<sub>2</sub>O to 100% MeOH in 10 min, then 100% MeOH to 20 min),  $t_R = 11.35$  min,  $m/z$  [M + H]<sup>+</sup> calcd for C<sub>19</sub>H<sub>38</sub>ClNO<sub>6</sub>, 412.24; found, 412.3; **HRMS** (ESI)  $m/z$  [M + H]<sup>+</sup> calcd for C<sub>19</sub>H<sub>38</sub>ClNO<sub>6</sub>, 412.2460; found, 412.2415.

### Chloro tool compound 4a

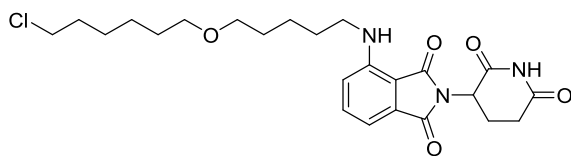

This compound was prepared using the General Procedure **IX** and compound **46** (0.32 g, 1 mmol). The crude product was purified by column chromatography (gradient of petroleum ether/EtOAc 2:1 to 1:1) to give a yellow solid.

Yield (86 mg, 18%); mp 36 – 38 °C;  $R_f$  = 0.51 (petroleum ether/EtOAc 1:1);  $^1\text{H NMR}$  (600 MHz, DMSO- $d_6$ )  $\delta$  1.24 – 1.41 (m, 6H), 1.42 – 1.61 (m, 6H), 1.64 – 1.71 (m, 2H, CH<sub>2</sub>), 1.98 – 2.05 (m, 1H, 4'-H), 2.45 – 2.61 (m, 2H, 4'-H, 5'-H), 2.81 – 2.92 (m, 1H, 5'-H), 3.25 – 3.36 (m, 6H, OCH<sub>2</sub>, NHCH<sub>2</sub>), 3.59 (t,  $J$  = 6.6 Hz, 2H, CH<sub>2</sub>Cl), 5.03 (dd,  $J$  = 5.4, 12.8 Hz, 1H, 3'-H), 6.51 (t,  $J$  = 6.0 Hz, 1H, NHCH<sub>2</sub>), 7.01 (d,  $J$  = 7.0 Hz, 1H), 7.08 (d,  $J$  = 8.6 Hz, 1H, 5-H, 7-H), 7.56 (dd,  $J$  = 7.0, 8.6 Hz, 1H, 6-H), 11.06 (br s, 1H, NH);  $^{13}\text{C NMR}$  (151 MHz, DMSO- $d_6$ )  $\delta$  22.32 (C-4'), 23.31, 25.15, 26.26, 28.69, 29.09, 29.23 (CH<sub>2</sub>), 31.14 (C-5'), 32.17 (CH<sub>2</sub>), 41.98 (NHCH<sub>2</sub>), 45.52 (CH<sub>2</sub>Cl), 48.71 (C-3'), 69.99 (2 × OCH<sub>2</sub>), 109.19 (C-3a), 110.54 (C-7), 117.35 (C-5), 132.37 (C-7a), 136.43 (C-6), 146.62 (C-4), 167.48 (C-1), 169.12 (C-3), 170.23 (C-2'), 172.95 (C-6'); **LC-MS** (ESI) (90% H<sub>2</sub>O to 100% MeCN in 10 min, then 100% MeCN to 20 min, DAD 220-500 nm),  $t_R$  = 10.16 min, 99% purity,  $m/z$  [M + H]<sup>+</sup> calcd for C<sub>24</sub>H<sub>32</sub>ClN<sub>3</sub>O<sub>5</sub>, 478.21; found, 478.1; **HRMS** (ESI)  $m/z$  [M + H]<sup>+</sup> calcd for C<sub>24</sub>H<sub>32</sub>ClN<sub>3</sub>O<sub>5</sub>, 478.2103; found, 478.2100.

### Chloro tool compound 4b

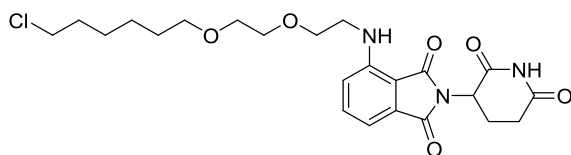

This compound was prepared using the General Procedure **IX** and compound **47** (0.32 g, 1 mmol). The crude product was purified by column chromatography (CH<sub>2</sub>Cl<sub>2</sub>/EtOH 39:1) to give a yellow oil.

Yield (0.14 g, 30%);  $R_f$  = 0.52 (petroleum ether/EtOAc 1:2);  $^1\text{H NMR}$  (500 MHz, DMSO- $d_6$ )  $\delta$  1.22 – 1.39 (m, 4H), 1.40 – 1.49 (m, 2H), 1.61 – 1.71 (m, 2H, CH<sub>2</sub>), 1.97 – 2.07 (m, 1H, 4'-H), 2.46 – 2.63 (m, 2H, 4'-H, 5'-H), 2.82 – 2.93 (m, 1H, 5'-H), 3.35 (t,  $J$  = 6.5 Hz, 2H, NHCH<sub>2</sub>), 3.42 – 3.50 (m, 4H, OCH<sub>2</sub>), 3.52 – 3.65 (m, 6H, OCH<sub>2</sub>, CH<sub>2</sub>Cl), 5.04 (dd,  $J$  = 5.4, 12.7 Hz, 1H, 3'-H), 6.58 (t,  $J$  = 5.9 Hz, 1H, NHCH<sub>2</sub>), 7.03 (d,  $J$  = 7.1 Hz, 1H), 7.13 (d,  $J$  = 8.6 Hz, 1H, 5-H, 7-H), 7.57 (dd,  $J$  = 7.1, 8.6 Hz, 1H, 6-H), 11.05 (br s, 1H);  $^{13}\text{C NMR}$  (126 MHz, DMSO- $d_6$ )  $\delta$  22.31 (C-4'), 25.04, 26.24, 29.18 (CH<sub>2</sub>), 31.14 (C-5'), 32.15 (CH<sub>2</sub>), 41.91 (NHCH<sub>2</sub>),

45.48 (CH<sub>2</sub>Cl), 48.73 (C-3'), 69.09, 69.69, 69.97, 70.39 (OCH<sub>2</sub>), 109.44 (C-3a), 110.82 (C-7), 117.60 (C-5), 132.26 (C-7a), 136.35 (C-6), 146.61 (C-4), 167.44 (C-1), 169.09 (C-3), 170.16 (C-2'), 172.90 (C-6'); **LC-MS** (ESI) (90% H<sub>2</sub>O to 100% MeCN in 10 min, then 100% MeCN to 20 min, DAD 220-500 nm), *t<sub>R</sub>* = 9.26 min, 95% purity, *m/z* [M + H]<sup>+</sup> calcd for C<sub>23</sub>H<sub>30</sub>ClN<sub>3</sub>O<sub>6</sub>, 480.19; found, 480.1; **HRMS** (ESI) *m/z* [M + H]<sup>+</sup> calcd for C<sub>23</sub>H<sub>30</sub>ClN<sub>3</sub>O<sub>6</sub>, 480.1896; found, 480.1896.

#### Chloro tool compound 4c

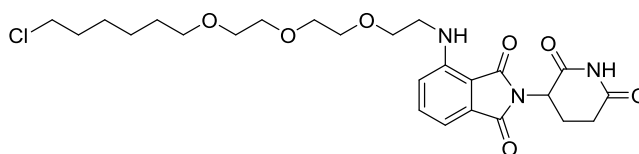

This compound was prepared using the General Procedure **IX** and compound **48** (0.37 g, 1 mmol). The crude product was purified by column chromatography (gradient of petroleum ether/EtOAc 1:1 to 1:2) to give a yellow oil.

Yield (0.17 g, 32%); *R<sub>f</sub>* = 0.38 (petroleum ether/EtOAc 1:2); <sup>1</sup>H NMR (500 MHz, DMSO-*d*<sub>6</sub>) δ 1.23 – 1.40 (m, 4H), 1.40 – 1.51 (m, 2H), 1.63 – 1.73 (m, 2H, CH<sub>2</sub>), 1.97 – 2.07 (m, 1H, 4'-H), 2.46 – 2.62 (m, 2H, 4'-H, 5'-H), 2.81 – 2.93 (m, 1H, 5'-H), 3.34 (t, *J* = 6.6 Hz, 2H, NHCH<sub>2</sub>), 3.40 – 3.65 (m, 14H, OCH<sub>2</sub>, CH<sub>2</sub>Cl), 5.04 (dd, *J* = 5.4, 12.7 Hz, 1H, 3'-H), 6.58 (t, *J* = 5.8 Hz, 1H, NHCH<sub>2</sub>), 7.03 (d, *J* = 7.0 Hz, 1H), 7.13 (d, *J* = 8.6 Hz, 1H, 5-H, 7-H), 7.57 (dd, *J* = 7.1, 8.6 Hz, 1H, 6-H), 11.05 (br s, 1H); <sup>13</sup>C NMR (126 MHz, DMSO-*d*<sub>6</sub>) δ 22.31 (C-4'), 25.05, 26.23, 29.18 (CH<sub>2</sub>), 31.13 (C-5'), 32.15 (CH<sub>2</sub>), 41.90 (NHCH<sub>2</sub>), 45.48 (CH<sub>2</sub>Cl), 48.73 (C-3'), 69.06, 69.63, 69.96, 69.98, 70.02, 70.30 (OCH<sub>2</sub>), 109.44 (C-3a), 110.82 (C-7), 117.60 (C-5), 132.26 (C-7a), 136.36 (C-6), 146.60 (C-4), 167.44 (C-1), 169.09 (C-3), 170.16 (C-2'), 172.90 (C-6'); **LC-MS** (ESI) (90% H<sub>2</sub>O to 100% MeCN in 10 min, then 100% MeCN to 20 min, DAD 220-500 nm), *t<sub>R</sub>* = 9.21 min, 99% purity, *m/z* [M + H]<sup>+</sup> calcd for C<sub>25</sub>H<sub>34</sub>ClN<sub>3</sub>O<sub>7</sub>, 524.21; found, 524.2; **HRMS** (ESI) *m/z* [M + H]<sup>+</sup> calcd for C<sub>25</sub>H<sub>34</sub>ClN<sub>3</sub>O<sub>7</sub>, 524.2158; found, 524.2152.



### Chloro tool compound 4d

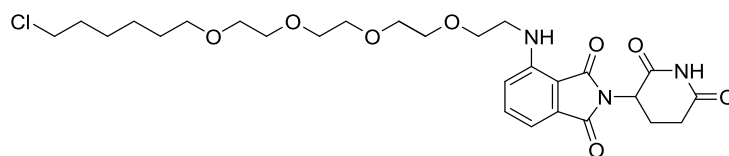

This compound was prepared using the General Procedure **IX** and compound **49** (0.41 g, 1 mmol). The crude product was purified by column chromatography (gradient of petroleum ether/EtOAc 1:2 to 1:4) to give a yellow oil.

Yield (0.20 g, 35%);  $R_f = 0.55$  (EtOAc);  $^1\text{H NMR}$  (600 MHz, DMSO- $d_6$ )  $\delta$  1.24 – 1.40 (m, 4H), 1.40 – 1.50 (m, 2H), 1.58 – 1.78 (m, 2H,  $\text{CH}_2$ ), 1.97 – 2.05 (m, 1H, 4'-H), 2.46 – 2.63 (m, 2H, 4'-H, 5'-H), 2.82 – 2.92 (m, 1H, 5'-H), 3.34 (t,  $J = 6.6$  Hz, 2H,  $\text{NHCH}_2$ ), 3.40 – 3.65 (m, 18H,  $\text{OCH}_2$ ,  $\text{CH}_2\text{Cl}$ ), 5.04 (dd,  $J = 5.5, 12.8$  Hz, 1H, 3'-H), 6.59 (t,  $J = 5.8$  Hz, 1H,  $\text{NHCH}_2$ ), 7.03 (d,  $J = 7.0$  Hz, 1H), 7.13 (d,  $J = 8.6$  Hz, 1H, 5-H, 7-H), 7.57 (dd,  $J = 7.1, 8.5$  Hz, 1H), 11.06 (br s, 1H, NH);  $^{13}\text{C NMR}$  (151 MHz, DMSO- $d_6$ )  $\delta$  22.32 (C-4'), 25.07, 26.26, 29.20 ( $\text{CH}_2$ ), 31.15 (C-5'), 32.17 ( $\text{CH}_2$ ), 41.89 ( $\text{NHCH}_2$ ), 45.51 ( $\text{CH}_2\text{Cl}$ ), 48.74 (C-3'), 69.07, 69.64 ( $\text{OCH}_2$ ), 69.96, 69.97 ( $2 \times \text{OCH}_2$ ), 70.03, 70.32 ( $\text{OCH}_2$ ), 109.44 (C-3a), 110.84 (C-7), 117.62 (C-5), 132.27 (C-7a), 136.39 (C-6), 146.61 (C-4), 167.46 (C-1), 169.11 (C-3), 170.20 (C-2'), 172.94 (C-6'); **LC-MS** (ESI) (90%  $\text{H}_2\text{O}$  to 100% MeCN in 10 min, then 100% MeCN to 20 min, DAD 220-450 nm),  $t_R = 9.05$  min, 99% purity,  $m/z$   $[\text{M} + \text{H}]^+$  calcd for  $\text{C}_{27}\text{H}_{38}\text{ClN}_3\text{O}_8$ , 568.24; found, 568.4.

## 5. Benzyl-protected hydroxy linkers:

### 2-(2-(Benzyloxy)ethoxy)ethyl methanesulfonate (50)<sup>7</sup>

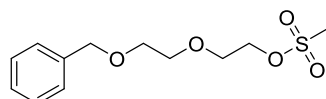

This compound was prepared using the General Procedure II and 2-(2-(benzyloxy)ethoxy)ethan-1-ol (3.92 g, 20 mmol). The crude product (orange oil) was used in the next step without further purification.

Yield (5.61 g, 99%);  $R_f = 0.73$  (EtOAc);  $^1\text{H NMR}$  (400 MHz,  $\text{CDCl}_3$ )  $\delta$  2.98 (s, 3H,  $\text{SO}_2\text{CH}_3$ ), 3.59 – 3.64 (m, 2H,  $\text{OCH}_2$ ), 3.64 – 3.69 (m, 2H,  $\text{OCH}_2$ ), 3.73 (sym m, 2H,  $\text{OCH}_2$ ), 4.34 (sym m, 2H,  $\text{OCH}_2$ ), 4.53 (s, 2H,  $\text{CH}_2$ ), 7.23 – 7.38 (m, 5H, Ar-H);  $^{13}\text{C NMR}$  (101 MHz,  $\text{CDCl}_3$ )  $\delta$  37.27 ( $\text{SO}_2\text{CH}_3$ ), 68.68 ( $\text{OCH}_2$ ), 69.07 ( $\text{OCH}_2$ ), 69.21 ( $\text{OCH}_2$ ), 70.32 ( $\text{OCH}_2$ ), 72.99 ( $\text{OCH}_2\text{Ph}$ ), 127.42 (C-4'), 127.47 (C-2'), 128.13 (C-3'), 137.79 (C-1'); **HPLC** (95%  $\text{H}_2\text{O}$  (with 0.1% TFA) to 95% MeCN in 10 min, then 95% MeCN for 4 min),  $t_R = 4.84$  min, 97% purity, detection at 210 nm; **HRMS** (ESI)  $m/z$  [ $\text{M} + \text{Na}$ ]<sup>+</sup> calcd for  $\text{C}_{12}\text{H}_{18}\text{O}_5\text{S}$ , 297.0767; found, 297.0757.

### 2-(2-(2-(Benzyloxy)ethoxy)ethoxy)ethyl methanesulfonate (51)

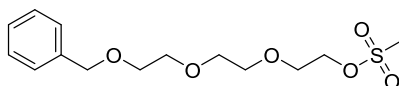

This compound was prepared using the General Procedure II and 2-(2-(2-(benzyloxy)ethoxy)ethoxy)ethan-1-ol (4.80 g, 20 mmol). The crude product (yellow oil) was used in the next step without further purification.

Yield (6.78 g, 99%);  $R_f = 0.68$  (EtOAc);  $^1\text{H NMR}$  (400 MHz,  $\text{CDCl}_3$ )  $\delta$  3.01 (s, 3H,  $\text{SO}_2\text{CH}_3$ ), 3.58 – 3.69 (m, 8H,  $\text{OCH}_2$ ), 3.73 (sym m, 2H,  $\text{OCH}_2$ ), 4.34 (sym m, 2H,  $\text{OCH}_2$ ), 4.54 (s, 2H,  $\text{CH}_2$ ), 7.24 – 7.39 (m, 5H, Ar-H);  $^{13}\text{C NMR}$  (101 MHz,  $\text{CDCl}_3$ )  $\delta$  37.30 ( $\text{SO}_2\text{CH}_3$ ), 68.68 ( $\text{OCH}_2$ ), 69.13 ( $\text{OCH}_2$ ), 69.18 ( $\text{OCH}_2$ ), 70.23 ( $\text{OCH}_2$ ), 70.29 (2C,  $\text{OCH}_2$ ), 72.89 ( $\text{OCH}_2\text{Ph}$ ), 127.36 (C-4'), 127.47 (C-2'), 128.10 (C-3'), 137.92 (C-1'); **HPLC** (95%  $\text{H}_2\text{O}$  (with 0.1% TFA) to 95% MeCN in 10 min, then 95% MeCN for 4 min),  $t_R = 4.95$  min, 95% purity, detection at 210 nm; **HRMS** (ESI)  $m/z$  [ $\text{M} + \text{Na}$ ]<sup>+</sup> calcd for  $\text{C}_{14}\text{H}_{22}\text{O}_6\text{S}$ , 341.1029; found, 341.1016.

### 1-Phenyl-2,5,8,11-tetraoxatridecan-13-yl methanesulfonate (52)

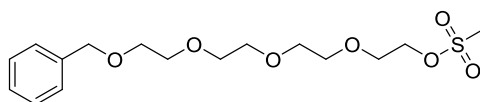

This compound was prepared using the General Procedure II and 1-phenyl-2,5,8,11-tetraoxatridecan-13-ol (5.68 g, 10 mmol). The crude product (yellow oil) was used in the next step without further purification.

Yield (7.44 g, 99%);  $R_f = 0.44$  (EtOAc);  $^1\text{H NMR}$  (400 MHz,  $\text{CDCl}_3$ )  $\delta$  3.04 (s, 3H,  $\text{SO}_2\text{CH}_3$ ), 3.58 – 3.70 (m, 12H,  $\text{OCH}_2$ ), 3.73 (sym m, 2H,  $\text{OCH}_2$ ), 4.34 (sym m, 2H,  $\text{OCH}_2$ ), 4.55 (s, 2H,  $\text{CH}_2$ ), 7.22 – 7.38 (m, 5H, Ar-H);  $^{13}\text{C NMR}$  (101 MHz,  $\text{CDCl}_3$ )  $\delta$  37.40 ( $\text{SO}_2\text{CH}_3$ ), 68.72 ( $\text{OCH}_2$ ), 69.18 (2C,  $\text{OCH}_2$ ), 70.25 ( $\text{OCH}_2$ ), 70.31 ( $\text{OCH}_2$ ), 70.35 (3C,  $\text{OCH}_2$ ), 72.93 ( $\text{OCH}_2\text{Ph}$ ), 127.37 (C-4'), 127.51 (C-2'), 128.13 (C-3'), 138.01 (C-1'); **HPLC** (95%  $\text{H}_2\text{O}$  (with 0.1% TFA) to 95% MeCN in 10 min, then 95% MeCN for 4 min),  $t_R = 5.02$  min, 95% purity, detection at 210 nm; **HRMS** (ESI)  $m/z$   $[\text{M} - \text{H}]^-$  calcd for  $\text{C}_{16}\text{H}_{26}\text{O}_7\text{S}$ , 361.1316; found, 361.1325.

### ((2-(2-Azidoethoxy)ethoxy)methyl)benzene (53)<sup>7</sup>

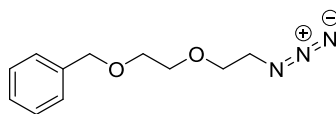

This compound was prepared using the General Procedure III and compound 50 (2.74 g, 10 mmol). The crude product (orange oil) was used in the next step without further purification.

Yield (2.02 g, 91%);  $R_f = 0.76$  (EtOAc);  $^1\text{H NMR}$  (400 MHz,  $\text{CDCl}_3$ )  $\delta$  3.34 (t,  $J = 4.8$  Hz, 2H,  $\text{N}_3\text{CH}_2$ ), 3.58 – 3.69 (m, 6H,  $\text{OCH}_2$ ), 4.54 (s, 2H,  $\text{CH}_2$ ), 7.21 – 7.37 (m, 5H, Ar-H);  $^{13}\text{C NMR}$  (101 MHz,  $\text{CDCl}_3$ )  $\delta$  50.34 ( $\text{CH}_2\text{N}_3$ ), 69.18 ( $\text{OCH}_2$ ), 69.72 ( $\text{OCH}_2$ ), 70.37 ( $\text{OCH}_2$ ), 72.99 ( $\text{OCH}_2\text{Ph}$ ), 127.27 (C-4'), 127.36 (C-2'), 128.04 (C-3'), 137.92 (C-1'); **HPLC** (95%  $\text{H}_2\text{O}$  (with 0.1% TFA) to 95% MeCN in 10 min, then 95% MeCN for 4 min),  $t_R = 5.59$  min, 98% purity, detection at 210 nm; **HRMS** (ESI)  $m/z$   $[\text{M} + \text{Na}]^+$  calcd for  $\text{C}_{11}\text{H}_{15}\text{N}_3\text{O}_2$ , 244.1056; found, 244.1048.

### ((2-(2-(2-Azidoethoxy)ethoxy)ethoxy)methyl)benzene (54)

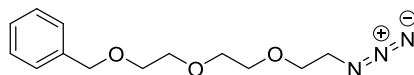

This compound was prepared using the General Procedure III and compound **51** (3.18 g, 10 mmol). The crude product (yellow oil) was used in the next step without further purification.

Yield (2.41 g, 91%);  $R_f = 0.74$  (EtOAc);  $^1\text{H NMR}$  (400 MHz,  $\text{CDCl}_3$ )  $\delta$  3.39 (t,  $J = 4.9$  Hz, 2H,  $\text{N}_3\text{CH}_2$ ), 3.59 – 3.72 (m, 10H,  $\text{OCH}_2$ ), 4.55 (s, 2H,  $\text{CH}_2$ ), 7.22 – 7.39 (m, 5H, Ar-H);  $^{13}\text{C NMR}$  (101 MHz,  $\text{CDCl}_3$ )  $\delta$  50.34 ( $\text{CH}_2\text{N}_3$ ), 69.16 ( $\text{OCH}_2$ ), 69.74 ( $\text{OCH}_2$ ), 70.39 ( $2 \times \text{OCH}_2$ ), 70.41 ( $\text{OCH}_2$ ), 72.89 ( $\text{OCH}_2\text{Ph}$ ), 127.28 (C-4'), 127.42 (C-2'), 128.05 (C-3'), 138.01 (C-1'); **HPLC** (95%  $\text{H}_2\text{O}$  (with 0.1% TFA) to 95% MeCN in 10 min, then 95% MeCN for 4 min),  $t_R = 5.64$  min, 96% purity, detection at 210 nm; **HRMS** (ESI)  $m/z$  [ $\text{M} + \text{H}$ ] $^+$  calcd for  $\text{C}_{13}\text{H}_{19}\text{N}_3\text{O}_3$ , 266.1499; found, 266.1490.

### 13-Azido-1-phenyl-2,5,8,11-tetraoxatridecane (55)

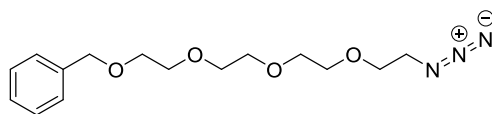

This compound was prepared using the General Procedure III and compound **52** (3.62 g, 10 mmol). The crude product (yellow oil) was used in the next step without further purification.

Yield (2.77 g, 89%);  $R_f = 0.58$  (EtOAc);  $^1\text{H NMR}$  (400 MHz,  $\text{CDCl}_3$ )  $\delta$  3.34 (t,  $J = 4.9$  Hz, 2H,  $\text{N}_3\text{CH}_2$ ), 3.55 – 3.74 (m, 14H,  $\text{OCH}_2$ ), 4.55 (s, 2H,  $\text{CH}_2$ ), 7.22 – 7.38 (m, 5H, Ar-H);  $^{13}\text{C NMR}$  (101 MHz,  $\text{CDCl}_3$ )  $\delta$  50.36 ( $\text{CH}_2\text{N}_3$ ), 69.16 ( $\text{OCH}_2$ ), 69.74 ( $\text{OCH}_2$ ), 70.36 ( $3 \times \text{OCH}_2$ ), 70.39 ( $2 \times \text{OCH}_2$ ), 72.91 ( $\text{OCH}_2\text{Ph}$ ), 127.30 (C-4'), 127.45 (C-2'), 128.07 (C-3'), 138.02 (C-1'); **HPLC** (95%  $\text{H}_2\text{O}$  (with 0.1% TFA) to 95% MeCN in 10 min, then 95% MeCN for 4 min),  $t_R = 5.66$  min, 96% purity, detection at 210 nm; **HRMS** (ESI)  $m/z$  [ $\text{M} + \text{Na}$ ] $^+$  calcd for  $\text{C}_{15}\text{H}_{23}\text{N}_3\text{O}_4$ , 332.1581; found, 332.1568.

## 2-(2-(Benzyloxy)ethoxy)ethan-1-amine (56)<sup>7</sup>

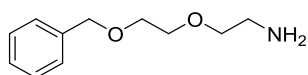

This compound was prepared using the General Procedure **IV** and compound **53** (1.11 g, 5 mmol). The crude product was purified by column chromatography (CH<sub>2</sub>Cl<sub>2</sub>/MeOH/NH<sub>4</sub>OH 15:1:0.5) to give a colorless oil.

Yield (0.91 g, 93%); *R<sub>f</sub>* = 0.42 (CH<sub>2</sub>Cl<sub>2</sub>/MeOH/NH<sub>4</sub>OH 9:1:0.5); **<sup>1</sup>H NMR** (400 MHz, CDCl<sub>3</sub>) δ 1.41 (br s, 2H, NH<sub>2</sub>), 2.86 (t, *J* = 5.1 Hz, 2H, CH<sub>2</sub>NH<sub>2</sub>), 3.50 (t, *J* = 5.4 Hz, 2H, OCH<sub>2</sub>), 3.59 – 3.67 (m, 4H, OCH<sub>2</sub>), 4.57 (s, 2H, CH<sub>2</sub>), 7.23 – 7.37 (m, 5H, Ar-H); **<sup>13</sup>C NMR** (101 MHz, CDCl<sub>3</sub>) δ 41.77 (CH<sub>2</sub>NH<sub>2</sub>), 69.28 (OCH<sub>2</sub>), 70.29 (OCH<sub>2</sub>), 73.17, 73.45, 127.55 (C-4'), 127.66 (C-2'), 128.30 (C-3'), 138.13 (C-1'); **HPLC** (95% H<sub>2</sub>O (with 0.1% TFA) to 95% MeCN in 10 min, then 95% MeCN for 4 min), *t<sub>R</sub>* = 3.18 min, 96% purity, detection at 210 nm; **HRMS** (ESI) *m/z* [M + H]<sup>+</sup> calcd for C<sub>11</sub>H<sub>17</sub>NO<sub>2</sub>, 196.1332; found, 196.1328.

## 2-(2-(2-(Benzyloxy)ethoxy)ethoxy)ethan-1-amine (57)

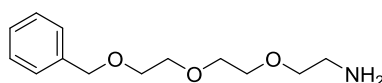

This compound was prepared using the General Procedure **IV** and compound **54** (1.33 g, 5 mmol). The crude product was purified by column chromatography (CH<sub>2</sub>Cl<sub>2</sub>/MeOH/NH<sub>4</sub>OH 15:1:0.5) to give a yellow oil.

Yield (1.05 g, 88%); *R<sub>f</sub>* = 0.37 (CH<sub>2</sub>Cl<sub>2</sub>/MeOH/NH<sub>4</sub>OH 9:1:0.5); **<sup>1</sup>H NMR** (400 MHz, CDCl<sub>3</sub>) δ 1.52 (br s, 2H, NH<sub>2</sub>), 2.84 (t, *J* = 5.3 Hz, 2H, CH<sub>2</sub>NH<sub>2</sub>), 3.49 (t, *J* = 5.4 Hz, 2H, OCH<sub>2</sub>), 3.59 – 3.70 (m, 8H, OCH<sub>2</sub>), 4.56 (s, 2H, CH<sub>2</sub>), 7.23 – 7.37 (m, 5H, Ar-H); **<sup>13</sup>C NMR** (101 MHz, CDCl<sub>3</sub>) δ 41.05 (CH<sub>2</sub>NH<sub>2</sub>), 69.08 (OCH<sub>2</sub>), 69.91 (OCH<sub>2</sub>), 70.24 (OCH<sub>2</sub>), 70.27 (OCH<sub>2</sub>), 72.18 (OCH<sub>2</sub>), 72.88 (OCH<sub>2</sub>Ph), 127.30 (C-4'), 127.45 (C-2'), 128.05 (C-3'), 137.89 (C-1'); **HPLC** (95% H<sub>2</sub>O (with 0.1% TFA) to 95% MeCN in 10 min, then 95% MeCN for 4 min), *t<sub>R</sub>* = 3.53 min, 94% purity, detection at 210 nm; **HRMS** (ESI) *m/z* [M + Na]<sup>+</sup> calcd for C<sub>13</sub>H<sub>21</sub>NO<sub>3</sub>, 262.1414; found, 262.1403.

### 1-Phenyl-2,5,8,11-tetraoxatridecan-13-amine (58)

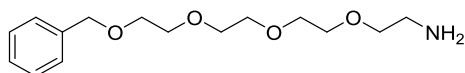

This compound was prepared using the General Procedure **IV** and compound **55** (1.55 g, 5 mmol). The crude product was purified by column chromatography (CH<sub>2</sub>Cl<sub>2</sub>/MeOH/NH<sub>4</sub>OH 20:1:0.5) to give a yellow oil.

Yield (1.33 g, 94%); *R<sub>f</sub>* = 0.37 (CH<sub>2</sub>Cl<sub>2</sub>/MeOH/NH<sub>4</sub>OH 9:1:0.5); **<sup>1</sup>H NMR** (400 MHz, CDCl<sub>3</sub>) δ 2.20 (br s, 2H, NH<sub>2</sub>), 2.82 (t, *J* = 5.1 Hz, 2H, CH<sub>2</sub>NH<sub>2</sub>), 3.48 (t, *J* = 5.3 Hz, 2H, OCH<sub>2</sub>), 3.56 – 3.70 (m, 12H, OCH<sub>2</sub>), 4.55 (s, 2H, CH<sub>2</sub>), 7.22 – 7.38 (m, 5H, Ar-H); **<sup>13</sup>C NMR** (101 MHz, CDCl<sub>3</sub>) δ 41.24 (CH<sub>2</sub>NH<sub>2</sub>), 69.02 (OCH<sub>2</sub>), 69.86 (OCH<sub>2</sub>), 70.15 (OCH<sub>2</sub>), 70.18 (OCH<sub>2</sub>), 70.22 (2 × OCH<sub>2</sub>), 72.74 (OCH<sub>2</sub>), 72.78 (OCH<sub>2</sub>Ph), 127.18 (C-4'), 127.32 (C-2'), 127.94 (C-3'), 137.83 (C-1'); **HPLC** (95% H<sub>2</sub>O (with 0.1% TFA) to 95% MeCN in 10 min, then 95% MeCN for 4 min), *t<sub>R</sub>* = 3.82 min, 94% purity, detection at 210 nm; **HRMS** (ESI) *m/z* [M + H]<sup>+</sup> calcd for C<sub>15</sub>H<sub>25</sub>NO<sub>4</sub>, 284.1856; found, 284.1845.

### 6-(Benzyloxy)hexan-1-ol (59)<sup>16</sup>

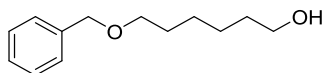

This compound was synthesized similar to a previously reported procedure.<sup>16</sup> In brief, to a cooled (0 °C) suspension of NaH (60% dispersion in mineral oil, 0.56 g, 14.0 mmol) in dry THF (10 mL), a solution of 1,6-hexanediol (1.50 g, 12.7 mmol) in dry THF (10 mL) was slowly added. After 1 h of stirring at 0 °C, benzyl bromide (1.95 g, 11.4 mmol) was added and the reaction mixture stirred at rt for 24 h. Subsequently, saturated NH<sub>4</sub>Cl solution (10 mL) was added and the majority of THF evaporated. The aqueous phase was extracted with Et<sub>2</sub>O (3 × 20 mL). The combined organic layers were washed with H<sub>2</sub>O (10 mL) and brine (10 mL), dried over Na<sub>2</sub>SO<sub>4</sub>, filtered and evaporated. The crude product was purified by column chromatography (EtOAc/*n*-hexane 1:2) to obtain a colorless oil.

Yield (1.23 g, 46%); *R<sub>f</sub>* = 0.62 (EtOAc/*n*-hexane 1:2); **<sup>1</sup>H NMR** (400 MHz, CDCl<sub>3</sub>) δ 1.34 – 1.45 (m, 5H, CH<sub>2</sub>, OH), 1.54 – 1.68 (m, 4H, CH<sub>2</sub>), 3.47 (t, *J* = 6.6 Hz, 2H, CH<sub>2</sub>O), 3.63 (t, *J* = 6.6 Hz, 2H, HOCH<sub>2</sub>), 4.50 (s, 2H, CH<sub>2</sub>), 7.25 – 7.37 (m, 5H, Ar-H); **<sup>13</sup>C NMR** (101 MHz, CDCl<sub>3</sub>) δ 25.48 (CH<sub>2</sub>), 25.89 (CH<sub>2</sub>), 29.59 (CH<sub>2</sub>), 32.56 (CH<sub>2</sub>), 62.67 (OCH<sub>2</sub>), 70.23 (OCH<sub>2</sub>), 72.77 (OCH<sub>2</sub>Ph), 127.36 (C-4'), 127.47 (C-2'), 128.10 (C-3'), 137.92 (C-1'); **HPLC** (95% H<sub>2</sub>O (with 0.1% TFA) to 95% MeCN in 10 min, then 95% MeCN for 4 min), *t<sub>R</sub>* = 5.53 min, 94% purity, detection at 210 nm; **HRMS** (ESI) *m/z* [M + Na]<sup>+</sup> calcd for C<sub>13</sub>H<sub>20</sub>O<sub>2</sub>, 231.1356; found, 231.1347.

### (((6-((6-Chlorohexyl)oxy)hexyl)oxy)methyl)benzene (60)

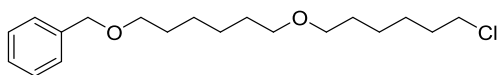

To a solution of **59** (1.20 g, 5.75 mmol) in DMSO (10 mL), NaOH (50%, 2 mL) and 1-bromo-6-chlorohexane (1.04 g, 5.23 mmol) were added and the mixture stirred at rt for 24 h. Then, saturated NH<sub>4</sub>Cl (100 mL) was added and the mixture extracted with CH<sub>2</sub>Cl<sub>2</sub> (2 × 100 mL). The combined organic phases were washed with H<sub>2</sub>O (100 mL) and brine (100 mL), dried over Na<sub>2</sub>SO<sub>4</sub>, filtered and evaporated. The crude product was purified by column chromatography (EtOAc/*n*-hexane 1:6) to obtain a colorless oil.

Yield (0.79 g, 42%); *R<sub>f</sub>* = 0.65 (EtOAc/*n*-hexane 1:4); <sup>1</sup>H NMR (400 MHz, CDCl<sub>3</sub>) δ 1.32 – 1.48 (m, 8H, CH<sub>2</sub>), 1.54 – 1.68 (m, 6H, CH<sub>2</sub>), 1.74 – 1.82 (m, 2H, CH<sub>2</sub>), 3.35 – 3.42 (m, 4H, CH<sub>2</sub>), 3.46 (t, *J* = 6.6 Hz, 2H, OCH<sub>2</sub>), 3.52 (t, *J* = 6.7 Hz, 2H, OCH<sub>2</sub>), 4.49 (s, 2H, CH<sub>2</sub>), 7.23 – 7.36 (m, 5H, Ar-H); <sup>13</sup>C NMR (101 MHz, CDCl<sub>3</sub>) δ 25.50 (CH<sub>2</sub>), 26.04 (2 × CH<sub>2</sub>), 26.69 (CH<sub>2</sub>), 29.56 (CH<sub>2</sub>), 29.67 (CH<sub>2</sub>), 29.70 (CH<sub>2</sub>), 32.53 (CH<sub>2</sub>), 45.05 (CH<sub>2</sub>Cl), 70.37 (OCH<sub>2</sub>), 70.64 (OCH<sub>2</sub>), 70.86 (OCH<sub>2</sub>), 72.82 (OCH<sub>2</sub>Ph), 127.44 (C-4'), 127.58 (C-2'), 128.31 (C-3'), 138.63 (C-1'); HPLC (95% H<sub>2</sub>O (with 0.1% TFA) to 95% MeCN in 10 min, then 95% MeCN for 4 min), *t<sub>R</sub>* = 8.36 min, 97% purity, detection at 210 nm; HRMS (ESI) *m/z* [M + Na]<sup>+</sup> calcd for C<sub>19</sub>H<sub>31</sub>O<sub>2</sub>Cl, 349.1905; found, 349.1891.

### (((6-((6-Azidohexyl)oxy)hexyl)oxy)methyl)benzene (61)

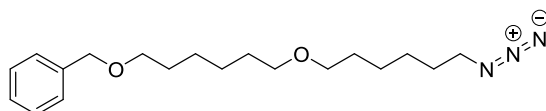

This compound was prepared using the General Procedure III on a smaller scale, where compound **60** was 0.80 g (2.44 mmol). The crude product (colorless oil) was used in the next step without further purification.

Yield (0.82 g, 99%); *R<sub>f</sub>* = 0.47 (EtOAc/*n*-hexane 1:4); <sup>1</sup>H NMR (400 MHz, CDCl<sub>3</sub>) δ 1.30 – 1.44 (m, 8H, CH<sub>2</sub>), 1.52 – 1.68 (m, 8H, CH<sub>2</sub>), 3.26 (t, *J* = 7.0 Hz, 2H, N<sub>3</sub>CH<sub>2</sub>), 3.36 – 3.44 (m, 4H, OCH<sub>2</sub>), 3.47 (t, *J* = 6.6 Hz, 2H, OCH<sub>2</sub>), 4.50 (s, 2H, CH<sub>2</sub>), 7.24 – 7.36 (m, 5H, Ar-H); <sup>13</sup>C NMR (101 MHz, CDCl<sub>3</sub>) δ 25.82 (CH<sub>2</sub>), 26.09 (CH<sub>2</sub>), 26.10 (CH<sub>2</sub>), 26.60 (CH<sub>2</sub>), 28.82 (CH<sub>2</sub>), 29.63 (CH<sub>2</sub>), 29.73 (CH<sub>2</sub>), 29.75 (CH<sub>2</sub>), 51.41 (CH<sub>2</sub>N<sub>3</sub>), 70.42 (OCH<sub>2</sub>), 70.68 (OCH<sub>2</sub>), 70.91 (OCH<sub>2</sub>), 72.87 (OCH<sub>2</sub>Ph), 127.49 (C-4'), 127.63 (C-2'), 128.36 (C-3'), 138.68 (C-1'); HPLC (95% H<sub>2</sub>O (with 0.1% TFA) to 95% MeCN in 10 min, then 95% MeCN for 4 min), *t<sub>R</sub>* = 8.30 min, 93% purity, detection at 210 nm; HRMS (ESI) *m/z* [M + Na]<sup>+</sup> calcd for C<sub>19</sub>H<sub>31</sub>N<sub>3</sub>O<sub>2</sub>, 356.2308; found, 356.2295.

### 6-((6-(Benzyloxy)hexyl)oxy)hexan-1-amine (62)

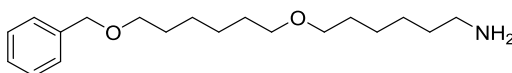

This compound was prepared using the General Procedure IV on a smaller scale where compound **61** was 0.80 g (2.40 mmol). The crude product was purified by column chromatography (CH<sub>2</sub>Cl<sub>2</sub>/MeOH/NH<sub>4</sub>OH 15:1:0.5) to give a colorless oil.

Yield (0.44 g, 59%);  $R_f = 0.43$  (CH<sub>2</sub>Cl<sub>2</sub>/MeOH/NH<sub>4</sub>OH 9:1:0.5); **<sup>1</sup>H NMR** (400 MHz, CDCl<sub>3</sub>)  $\delta$  1.28 – 1.48 (m, 13H, CH<sub>2</sub>, NH<sub>2</sub>), 1.50 – 1.64 (m, 5H, CH<sub>2</sub>), 2.67 (t,  $J = 7.1$  Hz, 2H, CH<sub>2</sub>NH<sub>2</sub>), 3.38 (t,  $J = 6.6$  Hz, 4H, OCH<sub>2</sub>), 3.46 (t,  $J = 6.7$  Hz, 2H, OCH<sub>2</sub>), 4.49 (s, 2H, CH<sub>2</sub>), 7.24 – 7.36 (m, 5H, Ar-H); **<sup>13</sup>C NMR** (101 MHz, CDCl<sub>3</sub>)  $\delta$  25.96 (2  $\times$  CH<sub>2</sub>), 25.98 (CH<sub>2</sub>), 26.64 (CH<sub>2</sub>), 29.64 (3  $\times$  CH<sub>2</sub>), 32.90 (CH<sub>2</sub>), 41.66 (CH<sub>2</sub>NH<sub>2</sub>), 70.29 (OCH<sub>2</sub>), 70.71 (OCH<sub>2</sub>), 70.76 (OCH<sub>2</sub>), 72.74 (OCH<sub>2</sub>Ph), 127.36 (C-4'), 127.49 (C-2'), 128.22 (C-3'), 138.55 (C-1'); **HPLC** (95% H<sub>2</sub>O (with 0.1% TFA) to 95% MeCN in 10 min, then 95% MeCN for 4 min),  $t_R = 5.48$  min, 97% purity, detection at 210 nm; **HRMS** (ESI)  $m/z$  [M + Na]<sup>+</sup> calcd for C<sub>19</sub>H<sub>33</sub>NO<sub>2</sub>, 330.2404; found, 330.2391.



### Benzyl-protected hydroxy tool compound 5a

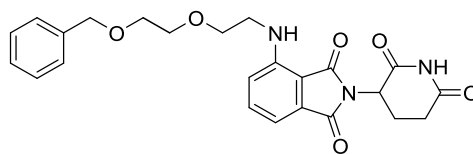

This compound was prepared using the General Procedure **IX** for the nucleophilic aromatic substitution, where 0.40 g (1.45 mmol) of 4-fluorothalidomide and 0.28 g (1.45 mmol) of compound **56** were used. The crude product was purified by column chromatography (EtOAc/*n*-hexane 1:1) to give a green oil.

Yield (0.26 g, 40%);  $R_f = 0.24$  (EtOAc/*n*-hexane 1:1);  $^1\text{H NMR}$  (400 MHz, DMSO- $d_6$ )  $\delta$  1.96 – 2.04 (m, 1H, 4'-H), 2.44 – 2.62 (m, 2H, 4'-H, 5'-H), 2.81 – 2.94 (m, 1H, 5'-H), 3.48 (q,  $J = 5.6$  Hz, 2H, Ar-NHCH $_2$ ), 3.54 – 3.64 (m, 6H, OCH $_2$ ), 4.48 (s, 2H, CH $_2$ ), 5.05 (dd,  $J = 5.3, 12.8$  Hz, 1H, 3'-H), 6.63 (t,  $J = 5.6$  Hz, 1H, Ar-NHCH $_2$ ), 7.03 (d,  $J = 6.8$  Hz, 1H), 7.14 (d,  $J = 8.7$  Hz, 1H, 5-H, 7-H), 7.22 – 7.34 (m, 5H, Ar-H), 7.57 (dd,  $J = 6.8, 8.7$  Hz, 1H, 6-H), 11.11 (br s, 1H, NH);  $^{13}\text{C NMR}$  (101 MHz, DMSO- $d_6$ )  $\delta$  22.07 (C-4'), 30.93 (C-5'), 41.65 (Ar-NHCH $_2$ ), 48.49 (C-3'), 68.91 (OCH $_2$ ), 69.13 (OCH $_2$ ), 69.75 (OCH $_2$ ), 72.03 (OCH $_2$ Ph), 109.17 (C-3a), 110.61 (C-7), 117.38 (C-5), 127.27 (C-4'), 127.37 (C-2'), 128.12 (C-3'), 132.02 (C-7a), 136.14 (C-6), 138.40 (C-1'), 146.35 (C-4), 167.24 (C-3), 168.88 (C-1), 170.04 (C-2'), 172.77 (C-6'); **HPLC** (95% H $_2$ O (with 0.1% TFA) to 95% MeCN in 10 min, then 95% MeCN for 4 min),  $t_R = 5.71$  min, 96% purity, detection at 210 nm; **HRMS** (ESI)  $m/z$  [M – H] $^-$  calcd for C $_{24}$ H $_{25}$ N $_3$ O $_6$ , 450.1660; found, 450.1665.

### Benzyl-protected hydroxy tool compound 5b

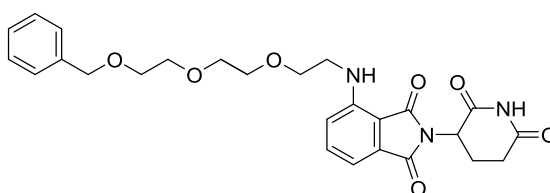

This compound was prepared using the General Procedure **IX** for the nucleophilic aromatic substitution, where 0.40 g (1.45 mmol) of 4-fluorothalidomide and 0.35 g (1.45 mmol) of compound **57** were used. The crude product was purified by column chromatography (EtOAc/*n*-hexane 4:1) to give a green oil.

Yield (0.31 mg, 44%);  $R_f = 0.16$  (EtOAc/*n*-hexane 1:1);  $^1\text{H NMR}$  (400 MHz, DMSO- $d_6$ )  $\delta$  1.94 – 2.05 (m, 1H, 4'-H), 2.44 – 2.62 (m, 2H, 4'-H, 5'-H), 2.81 – 2.94 (m, 1H, 5'-H), 3.40 – 3.58 (m, 10H, OCH $_2$ , Ar-NHCH $_2$ ), 3.62 (t,  $J = 5.3$  Hz, 2H, OCH $_2$ ), 4.46 (s, 2H, CH $_2$ ), 5.05 (dd,  $J = 5.3, 12.8$  Hz, 1H, 3'-H), 6.61 (t,  $J = 5.7$  Hz, 1H, Ar-NHCH $_2$ ), 7.03 (d,  $J = 6.7$  Hz, 1H), 7.14 (d,  $J = 8.6$  Hz, 1H, 5-H, 7-H), 7.22 – 7.36 (m, 5H, Ar-H), 7.57 (dd,  $J = 6.7, 8.6$  Hz, 1H, 6-H), 11.11 (br s, 1H, NH);  $^{13}\text{C NMR}$  (101 MHz, DMSO- $d_6$ )  $\delta$  22.09 (C-4'), 30.93 (C-5'),

41.63 (Ar-NHCH<sub>2</sub>), 48.49 (C-3'), 68.84 (OCH<sub>2</sub>), 69.10 (OCH<sub>2</sub>), 69.75 (OCH<sub>2</sub>), 69.79 (OCH<sub>2</sub>), 69.80 (OCH<sub>2</sub>), 71.96 (OCH<sub>2</sub>Ph), 109.17 (C-3a), 110.61 (C-7), 117.36 (C-5), 127.28 (C-4'), 127.40 (C-2'), 128.13 (C-3'), 132.02 (C-7a), 136.41 (C-6), 138.41 (C-1'), 146.33 (C-4), 167.24 (C-3), 168.88 (C-1), 170.03 (C-2'), 172.76 (C-6'); **HPLC** (95% H<sub>2</sub>O (with 0.1% TFA) to 95% MeCN in 10 min, then 95% MeCN for 4 min), *t<sub>R</sub>* = 5.74 min, 97% purity, detection at 210 nm; **HRMS** (ESI) *m/z* [M – H]<sup>–</sup> calcd for C<sub>26</sub>H<sub>29</sub>N<sub>3</sub>O<sub>7</sub>, 494.1922; found, 494.1927.

### Benzyl-protected hydroxy tool compound 5c

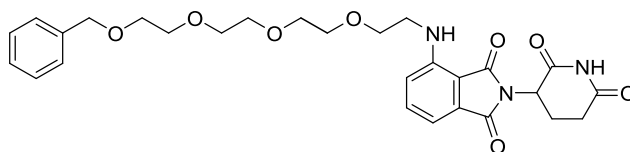

This compound was prepared using the General Procedure **IX** for the nucleophilic aromatic substitution, where 0.40 g (1.45 mmol) of 4-fluorothalidomide and 0.41 g (1.45 mmol) of compound **58** were used. The crude product was purified by column chromatography (EtOAc) to give a green oil.

Yield (0.33 g, 43%); *R<sub>f</sub>* = 0.18 (EtOAc/*n*-hexane 1:1); **<sup>1</sup>H NMR** (400 MHz, DMSO-*d*<sub>6</sub>) δ 1.96 – 2.05 (m, 1H, 4'-H), 2.44 – 2.62 (m, 2H, 4'-H, 5'-H), 2.81 – 2.94 (m, 1H, 5'-H), 3.45 (q, *J* = 5.7 Hz, 2H, Ar-NHCH<sub>2</sub>), 3.48 – 3.58 (m, 12H, OCH<sub>2</sub>), 3.61 (t, *J* = 5.4 Hz, 2H, OCH<sub>2</sub>), 4.47 (s, 2H, CH<sub>2</sub>), 5.05 (dd, *J* = 5.3, 12.8 Hz, 1H, 3'-H), 6.60 (t, *J* = 5.7 Hz, 1H, Ar-NHCH<sub>2</sub>), 7.04 (d, *J* = 6.7 Hz, 1H), 7.13 (d, *J* = 8.7 Hz, 1H, 5-H, 7-H), 7.23 – 7.36 (m, 5H, Ar-H), 7.57 (dd, *J* = 6.7, 8.7 Hz, 1H, 6-H), 11.11 (br s, 1H, NH); **<sup>13</sup>C NMR** (101 MHz, DMSO-*d*<sub>6</sub>) δ 22.09 (C-4'), 30.92 (C-5'), 41.62 (Ar-NHCH<sub>2</sub>), 48.49 (C-3'), 68.82 (OCH<sub>2</sub>), 69.06 (OCH<sub>2</sub>), 69.70 (OCH<sub>2</sub>), 69.73 (OCH<sub>2</sub>), 69.75 (OCH<sub>2</sub>), 69.79 (OCH<sub>2</sub>), 69.79 (OCH<sub>2</sub>), 71.95 (OCH<sub>2</sub>Ph), 109.16 (C-3a), 110.62 (C-7), 117.40 (C-5), 127.31 (C-4'), 127.43 (C-2'), 128.16 (C-3'), 132.03 (C-7a), 136.18 (C-6), 138.41 (C-1'), 146.34 (C-4), 167.25 (C-3), 168.88 (C-1), 170.04 (C-2'), 172.78 (C-6'); **HPLC** (95% H<sub>2</sub>O (with 0.1% TFA) to 95% MeCN in 10 min, then 95% MeCN for 4 min), *t<sub>R</sub>* = 5.76 min, 98% purity, detection at 210 nm; **HRMS** (ESI) *m/z* [M – H]<sup>–</sup> calcd for C<sub>28</sub>H<sub>33</sub>N<sub>3</sub>O<sub>8</sub>, 538.2184; found, 538.2184.

### Benzyl-protected hydroxy tool compound 5d

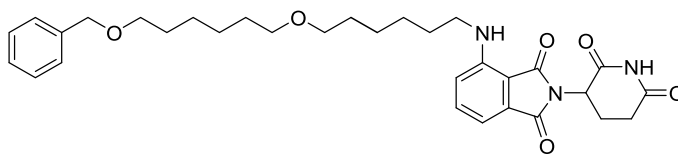

This compound was prepared using the General Procedure **IX** for the nucleophilic aromatic substitution, where 0.13 g (0.47 mmol) of 4-fluorothalidomide and 0.15 g (0.47 mmol) of compound **62** were used. The crude product was purified by column chromatography (EtOAc/*n*-hexane 1:1) to give a yellow oil.

Yield (75 mg, 28%);  $R_f$  = 0.28 (EtOAc/*n*-hexane 1:1);  $^1\text{H NMR}$  (400 MHz, DMSO- $d_6$ )  $\delta$  1.20 – 1.38 (m, 8H, CH<sub>2</sub>), 1.40 – 1.58 (m, 8H, CH<sub>2</sub>), 1.97 – 2.06 (m, 1H, 4'-H), 2.45 – 2.64 (m, 2H, 4'-H, 5'-H), 2.82 – 2.94 (m, 1H, 5'-H), 3.24 – 3.34 (m, 6H, OCH<sub>2</sub>, Ar-NHCH<sub>2</sub>), 3.39 (t,  $J$  = 6.4 Hz, 2H, OCH<sub>2</sub>), 4.42 (s, 2H, CH<sub>2</sub>), 5.05 (dd,  $J$  = 5.3, 12.8 Hz, 1H, 3'-H), 6.52 (t,  $J$  = 5.7 Hz, 1H, Ar-NHCH<sub>2</sub>), 7.01 (d,  $J$  = 7.1 Hz, 1H), 7.06 (d,  $J$  = 8.6 Hz, 1H, 5-H, 7-H), 7.22 – 7.37 (m, 5H, Ar-H), 7.56 (dd,  $J$  = 7.1, 8.6 Hz, 1H, 6-H), 11.11 (br s, 1H, NH);  $^{13}\text{C NMR}$  (101 MHz, DMSO- $d_6$ )  $\delta$  22.63 (C-4'), 25.95 (CH<sub>2</sub>), 26.04 (2C, CH<sub>2</sub>), 26.61 (CH<sub>2</sub>), 29.12 (CH<sub>2</sub>), 29.64 (CH<sub>2</sub>), 29.67 (2C, CH<sub>2</sub>), 31.45 (C-5'), 42.25 (Ar-NHCH<sub>2</sub>), 48.99 (C-3'), 70.02 (OCH<sub>2</sub>), 70.30 (OCH<sub>2</sub>), 70.35 (OCH<sub>2</sub>), 72.24 (OCH<sub>2</sub>Ph), 109.46 (C-3a), 110.83 (C-7), 117.60 (C-5), 127.75 (C-4'), 127.81 (C-2'), 128.66 (C-3'), 132.65 (C-7a), 136.73 (C-6), 139.19 (C-1'), 146.87 (C-4), 167.77 (C-3), 169.42 (C-1), 170.56 (C-2'), 173.29 (C-6'); **HPLC** (95% H<sub>2</sub>O (with 0.1% TFA) to 95% MeCN in 10 min, then 95% MeCN for 4 min),  $t_R$  = 7.77 min, 96% purity, detection at 210 nm; **HRMS** (ESI)  $m/z$  [M – H]<sup>–</sup> calcd for C<sub>32</sub>H<sub>41</sub>N<sub>3</sub>O<sub>6</sub>, 562.2912; found, 562.2913.

## J. Synthesis of the Chemical Probes 6 and 7

### Biotin-tagged CRBN ligand 6

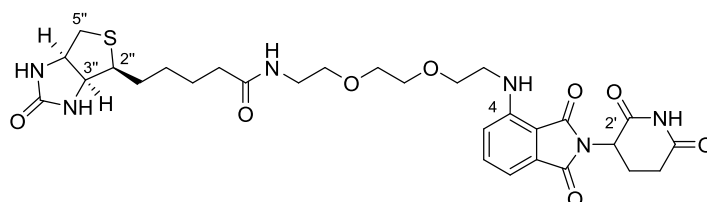

Compound **1b** (0.76 g, 1.5 mmol) was dissolved in dry  $\text{CH}_2\text{Cl}_2$  (20 mL) and trifluoroacetic acid (5 mL) was added. The mixture was stirred for 2 h at rt. The solvent was removed and it was coevaporated with dry  $\text{CH}_2\text{Cl}_2$  ( $3 \times 5$  mL). The oily residue was further dried in high vacuum. Subsequently, the residue was redissolved in dry DMF (10 mL) and DIPEA (0.58 g, 0.78 mL, 4.5 mmol). In a separate flask, (+)-Biotin (0.24 g, 1.0 mmol) was dissolved in dry DMF/dry  $\text{CH}_2\text{Cl}_2$  1:1 (40 mL) and HATU (0.42 g, 1.1 mmol) as well as DIPEA (0.13 g, 0.17 mL, 1.0 mmol) were added. The mixture was stirred for 10 min at rt, before the first solution containing the deprotected amine was added. The resulting yellow mixture was stirred for 18 h at rt. Subsequently, the solvents were removed and the residue was dissolved in  $\text{CH}_2\text{Cl}_2$  (100 mL) and it was washed with 10%  $\text{KHSO}_4$  solution,  $\text{H}_2\text{O}$ , saturated  $\text{NaHCO}_3$  solution,  $\text{H}_2\text{O}$  and brine (each 25 mL). The organic layer was dried over  $\text{Na}_2\text{SO}_4$ , filtered and concentrated *in vacuo*. The crude product was purified by column chromatography (gradient of  $\text{CH}_2\text{Cl}_2/\text{EtOH}$  19:1 to 9:1) to yield a yellow solid.

Yield (0.48 g, 76%); mp 92 – 94 °C;  $R_f = 0.32$  ( $\text{CH}_2\text{Cl}_2/\text{EtOH}$  19:1);  $^1\text{H NMR}$  (500 MHz,  $\text{DMSO}-d_6$ )  $\delta$  1.19 – 1.37 (m, 2H), 1.37 – 1.54 (m, 3H), 1.54 – 1.67 (m, 1H,  $\text{CH}_2$ ), 1.90 – 2.16 (m, 3H,  $\text{COCH}_2$ , 4'-H), 2.52 – 2.61 (m, 2H, 4'-H, 5'-H), 2.76 – 2.94 (m, 2H, 5'-H, 5''-H), 3.03 – 3.12 (m, 1H, 5''-H), 3.17 (q,  $J = 5.8$  Hz, 2H,  $\text{CONHCH}_2$ ), 3.36 – 3.49 (m, 5H,  $\text{OCH}_2$ , 2''-H), 3.49 – 3.58 (m, 4H,  $\text{OCH}_2$ ), 3.61 (t,  $J = 5.5$  Hz, 2H,  $\text{NHCH}_2$ ), 4.06 – 4.15 (m, 1H), 4.25 – 4.31 (m, 1H, 3''-H, 4''-H), 5.04 (dd,  $J = 5.4, 12.7$  Hz, 1H, 3'-H), 6.31 (br s, 1H), 6.36 (br s, 1H,  $\text{NHCONH}$ ), 6.59 (t,  $J = 5.8$  Hz, 1H,  $\text{NHCH}_2$ ), 7.03 (d,  $J = 7.1$  Hz, 1H), 7.13 (d,  $J = 8.6$  Hz, 1H, 5-H, 7-H), 7.58 (dd,  $J = 7.1, 8.6$  Hz, 1H, 6-H), 7.75 (t,  $J = 5.7$  Hz, 1H,  $\text{CONH}$ ), 11.05 (br s, 1H,  $\text{NH}$ );  $^{13}\text{C NMR}$  (126 MHz,  $\text{DMSO}-d_6$ )  $\delta$  22.30 (C-4'), 25.39, 28.18, 28.32 ( $\text{CH}_2$ ), 31.14 (C-5'), 35.25 ( $\text{CH}_2\text{CO}$ ), 38.60 (C-5''), 41.90 ( $\text{NHCH}_2$ ), 48.74 (C-3'), 55.55 (C-2''), 59.36 (C-4''), 61.20 (C-3''), 69.06, 69.36, 69.73, 69.85 ( $\text{OCH}_2$ ), 109.45 (C-3a), 110.85 (C-7), 117.60 (C-5), 132.27 (C-7a), 136.40 (C-6), 146.59 (C-4), 162.86 (CO), 167.45 (C-1), 169.11 (C-3), 170.21 (C-2'), 172.29 (CO), 172.93 (C-6'). One signal for  $\text{NHCH}_2$  is missing (overlapping solvent peaks); **LC-MS** (ESI) (90%  $\text{H}_2\text{O}$  to 100% MeCN in 10 min, then 100% MeCN to 20 min, DAD 220-500 nm),  $t_R = 6.47$  min, 99% purity,  $m/z$  [ $\text{M} + \text{H}$ ] $^+$  calcd for  $\text{C}_{29}\text{H}_{38}\text{N}_6\text{O}_8\text{S}$ , 631.25; found, 631.3; **HRMS** (ESI)  $m/z$  [ $\text{M} + \text{H}$ ] $^+$  calcd for  $\text{C}_{29}\text{H}_{38}\text{N}_6\text{O}_8\text{S}$ , 631.2545; found, 631.2536.

## Coumarin-labelled CRBN ligand **7**

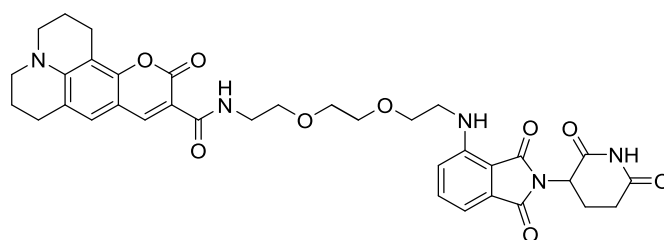

Compound **1b** (0.18 g, 0.35 mmol) was dissolved in dry  $\text{CH}_2\text{Cl}_2$  (10 mL) and trifluoroacetic acid (2.5 mL) was added. The mixture was stirred for 2 h at rt. The solvent was removed and it was coevaporated with dry  $\text{CH}_2\text{Cl}_2$  ( $3 \times 5$  mL). The oily residue was further dried in high vacuum. Subsequently, the residue was redissolved in dry DMF (5 mL) and DIPEA (0.18 g, 0.24 mL, 1.4 mmol). In a separate flask, coumarin 343<sup>4</sup> (71 mg, 0.25 mmol) was dissolved in dry DMF/ $\text{CH}_2\text{Cl}_2$  1:1 (10 mL) and HATU (105 mg, 0.275 mmol) as well as DIPEA (32 mg, 44  $\mu\text{L}$ , 0.25 mmol) were added. The mixture was stirred for 10 min at rt, before the first solution containing the deprotected amine was added. The resulting yellow mixture was stirred for 18 h at rt. Subsequently, the solvents were removed and the residue was dissolved in  $\text{CH}_2\text{Cl}_2$  (50 mL) and it was washed with 10%  $\text{KHSO}_4$  solution,  $\text{H}_2\text{O}$ , saturated  $\text{NaHCO}_3$  solution,  $\text{H}_2\text{O}$  and brine (each 12.5 mL). The organic layer was dried over  $\text{Na}_2\text{SO}_4$ , filtered and concentrated *in vacuo*. The crude product was purified by column chromatography (gradient of  $\text{CH}_2\text{Cl}_2/\text{EtOH}$  29:1 to 19:1) to yield an orange solid.

Yield (128 mg, 76%); mp 214 – 216 °C;  $R_f$  = 0.44 ( $\text{CH}_2\text{Cl}_2/\text{EtOH}$  19:1);  $^1\text{H NMR}$  (500 MHz,  $\text{DMSO}-d_6$ )  $\delta$  1.76 – 1.94 (m, 4H,  $\text{CH}_2$ ), 1.97 – 2.07 (m, 1H, 4'-H), 2.45 – 2.63 (m, 2H, 4'-H, 5'-H), 2.63 – 2.71 (m, 4H,  $\text{CH}_2$ ), 2.80 – 2.92 (m, 1H, 5'-H), 3.21 – 3.76 (m, 16H,  $\text{OCH}_2$ ,  $\text{NCH}_2$ ,  $\text{NHCH}_2$ ), 5.02 (dd,  $J$  = 5.4, 12.7 Hz, 1H, 3'-H), 6.53 (t,  $J$  = 5.8 Hz, 1H,  $\text{NHCH}_2$ ), 6.93 (d,  $J$  = 7.0 Hz, 1H), 7.07 (d,  $J$  = 8.6 Hz, 1H, 5-H, 7-H), 7.16 (s, 1H), 7.50 (dd,  $J$  = 7.1, 8.6 Hz, 1H, 6-H), 8.43 (s, 1H), 8.76 (t,  $J$  = 5.5 Hz, 1H), 11.04 (br s, 1H, NH);  $^{13}\text{C NMR}$  (126 MHz,  $\text{DMSO}-d_6$ )  $\delta$  19.71 ( $2 \times \text{CH}_2$ ), 20.68, 22.28 (C-4'), 26.92, 31.14 (C-5'), 38.95, 41.91 ( $\text{NHCH}_2$ ), 48.71 (C-3'), 49.13, 49.67, 69.05, 69.27, 69.88, 70.01 ( $\text{OCH}_2$ ), 104.73, 107.49, 107.99, 109.36 (C-3a), 110.64 (C-7), 117.37 (C-5), 119.51, 127.22, 132.13 (C-7a), 136.18 (C-6), 146.47 (C-4), 147.52, 148.09, 152.17, 161.98, 162.57 (CO), 167.40 (C-1), 169.00 (C-3), 170.17 (C-2'), 172.89 (C-6'); **LC-MS** (ESI) (90%  $\text{H}_2\text{O}$  to 100% MeCN in 10 min, then 100% MeCN to 20 min, DAD 220-500 nm),  $t_R$  = 8.41 min, 96% purity,  $m/z$  [ $\text{M} + \text{H}$ ]<sup>+</sup> calcd for  $\text{C}_{35}\text{H}_{37}\text{N}_5\text{O}_9$ , 672.26; found, 672.2; **HRMS** (ESI)  $m/z$  [ $\text{M} + \text{H}$ ]<sup>+</sup> calcd for  $\text{C}_{35}\text{H}_{37}\text{N}_5\text{O}_9$ , 672.2664; found, 672.2644.

## K. Synthesis of the hydrophobically tagged CRBN Ligands 8

### Hydrophobically tagged CRBN ligand 8a

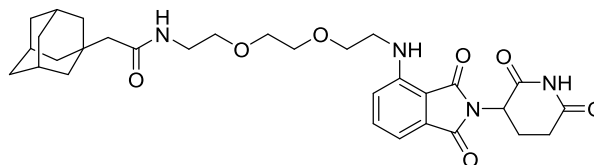

This compound was prepared using the General Procedure **XI** and compound **1b** (126 mg, 0.25 mmol). The crude product was purified by column chromatography (gradient of petroleum ether/EtOAc 1:2 to EtOAc) to give a yellow solid.

Yield (23 mg, 16%); mp 42 – 44 °C;  $R_f = 0.33$  (EtOAc);  $^1\text{H NMR}$  (600 MHz, DMSO- $d_6$ )  $\delta$  1.50 – 1.63 (m, 12H, CH<sub>2</sub>), 1.79 (s, 2H, COCH<sub>2</sub>), 1.83 – 1.90 (m, 3H, CH), 1.99 – 2.05 (m, 1H, 4'-H), 2.46 – 2.64 (m, 2H, 4'-H, 5'-H), 2.75 – 3.00 (m, 1H, 5'-H), 3.15 (q,  $J = 5.8$  Hz, 2H), 3.39 (t,  $J = 5.9$  Hz, 2H, NHCH<sub>2</sub>), 3.43 – 3.63 (m, 8H, OCH<sub>2</sub>), 5.04 (dd,  $J = 5.4, 12.9$  Hz, 1H, 3'-H), 6.59 (t,  $J = 5.8$  Hz, 1H, NHCH<sub>2</sub>), 7.03 (d,  $J = 7.0$  Hz, 1H), 7.13 (d,  $J = 8.6$  Hz, 1H, 5-H, 7-H), 7.57 (dd,  $J = 7.1, 8.6$  Hz, 1H, 6-H), 7.62 (t,  $J = 5.7$  Hz, 1H, NHCH<sub>2</sub>), 11.06 (br s, 1H, NH);  $^{13}\text{C NMR}$  (151 MHz, DMSO- $d_6$ )  $\delta$  22.32(C-4'), 28.22 (3  $\times$  CH), 31.15 (C-5'), 32.28 (C), 36.63 (3  $\times$  CH<sub>2</sub>), 38.49, 41.89 (NHCH<sub>2</sub>), 42.23 (3  $\times$  CH<sub>2</sub>), 48.74 (C-3'), 50.14 (COCH<sub>2</sub>), 69.06, 69.42, 69.72, 69.89 (OCH<sub>2</sub>), 109.47 (C-3a), 110.87 (C-7), 117.60 (C-5), 132.28 (C-7a), 136.41 (C-6), 146.59 (C-4), 167.46 (C-1), 169.13 (C-3), 170.14 (CO), 170.22 (C-2'), 172.94 (C-6'); **LC-MS** (ESI) (90% H<sub>2</sub>O to 100% MeCN in 10 min, then 100% MeCN to 20 min, DAD 220-500 nm),  $t_R = 8.68$  min, 97% purity,  $m/z$  [M + H]<sup>+</sup> calcd for C<sub>31</sub>H<sub>40</sub>N<sub>4</sub>O<sub>7</sub>, 581.29; found, 581.4; **HRMS** (ESI)  $m/z$  [M + H]<sup>+</sup> calcd for C<sub>31</sub>H<sub>40</sub>N<sub>4</sub>O<sub>7</sub>, 581.2970; found, 581.2984.

### Hydrophobically tagged CRBN ligand 8b

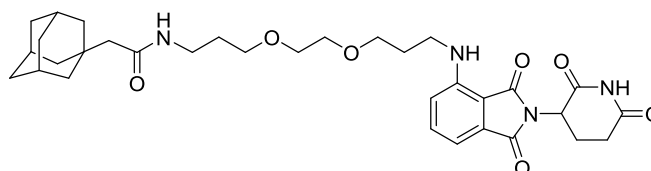

This compound was prepared using the General Procedure **XI** and compound **1c** (133 mg, 0.25 mmol). The crude product was purified by column chromatography (gradient of CH<sub>2</sub>Cl<sub>2</sub> to CH<sub>2</sub>Cl<sub>2</sub>/EtOH 19:1) to give a yellow solid.

Yield (87 mg, 57%); mp 80 – 82 °C;  $R_f$  = 0.28 (CH<sub>2</sub>Cl<sub>2</sub>/EtOH 29:1); <sup>1</sup>H NMR (500 MHz, DMSO-*d*<sub>6</sub>) δ 1.47 – 1.67 (m, 12H, CH<sub>2</sub>), 1.75 – 1.85 (m, 4H, CH<sub>2</sub>), 1.78 (s, 2H, COCH<sub>2</sub>), 1.85 – 1.90 (m, 3H, CH), 1.97 – 2.05 (m, 1H, 4'-H), 2.45 – 2.63 (m, 2H, 4'-H, 5'-H), 2.80 – 2.94 (m, 1H, 5'-H), 3.00 – 3.08 (m, 2H, NHCH<sub>2</sub>), 3.26 – 3.55 (m, 10H, OCH<sub>2</sub>, NHCH<sub>2</sub>), 5.03 (dd,  $J$  = 5.5, 12.7 Hz, 1H, 3'-H), 6.64 (t,  $J$  = 6.0 Hz, 1H, NHCH<sub>2</sub>), 7.01 (d,  $J$  = 7.0 Hz, 1H), 7.08 (d,  $J$  = 8.6 Hz, 1H, 5-H, 7-H), 7.46 – 7.67 (m, 2H, 6-H, NHCH<sub>2</sub>), 11.05 (br s, 1H, NH); <sup>13</sup>C NMR (126 MHz, DMSO-*d*<sub>6</sub>) δ 22.34 (C-4'), 28.22 (3 × CH), 29.07, 29.67 (CH<sub>2</sub>), 31.14 (C-5'), 32.30 (C), 35.79 (NHCH<sub>2</sub>), 36.63 (3 × CH<sub>2</sub>), 42.30 (3 × CH<sub>2</sub>), 48.72 (C-3'), 50.25 (COCH<sub>2</sub>), 68.38 (2 × OCH<sub>2</sub>), 69.68, 69.82 (OCH<sub>2</sub>), 109.28 (C-3a), 110.55 (C-7), 117.24 (C-5), 132.38 (C-7a), 136.43 (C-6), 146.64 (C-4), 167.49 (C-1), 169.02 (C-3), 169.96 (CO), 170.21 (C-2'), 172.94 (C-6'). One signal for NHCH<sub>2</sub> is missing (overlapping solvent peaks); **LC-MS** (ESI) (90% H<sub>2</sub>O to 100% MeOH in 10 min, then 100% MeOH to 20 min, DAD 220-450 nm),  $t_R$  = 11.66 min, 99% purity,  $m/z$  [M + H]<sup>+</sup> calcd for C<sub>33</sub>H<sub>44</sub>N<sub>4</sub>O<sub>7</sub>, 609.32; found, 609.2; **HRMS** (ESI)  $m/z$  [M + H]<sup>+</sup> calcd for C<sub>33</sub>H<sub>44</sub>N<sub>4</sub>O<sub>7</sub>, 609.3283; found, 609.3281.

#### Hydrophobically tagged CRBN ligand **8c**

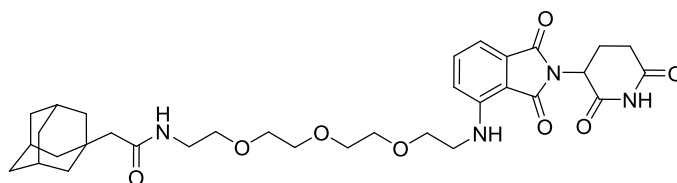

This compound was prepared using the General Procedure **XI** and compound **1d** (137 mg, 0.25 mmol). The crude product was purified by column chromatography (gradient of CH<sub>2</sub>Cl<sub>2</sub> to CH<sub>2</sub>Cl<sub>2</sub>/EtOH 19:1) to give a yellow solid.

Yield (155 mg, 99%); mp 70 – 72 °C;  $R_f$  = 0.36 (CH<sub>2</sub>Cl<sub>2</sub>/EtOH 19:1); <sup>1</sup>H NMR (500 MHz, DMSO-*d*<sub>6</sub>) δ 1.47 – 1.68 (m, 12H, CH<sub>2</sub>), 1.80 (s, 2H, COCH<sub>2</sub>), 1.83 – 1.92 (m, 3H, CH), 1.97 – 2.06 (m, 1H, 4'-H), 2.46 – 2.63 (m, 2H, 4'-H, 5'-H), 2.75 – 3.00 (m, 1H, 5'-H), 3.15 (q,  $J$  = 5.8 Hz, 2H), 3.37 (t,  $J$  = 5.9 Hz, 2H), 3.42 – 3.58 (m, 10H, OCH<sub>2</sub>, NHCH<sub>2</sub>), 3.61 (t,  $J$  = 5.5 Hz, 2H, NHCH<sub>2</sub>), 5.04 (dd,  $J$  = 5.4, 12.7 Hz, 1H, 3'-H), 6.58 (t,  $J$  = 5.9 Hz, 1H, NHCH<sub>2</sub>), 7.03 (d,  $J$  = 7.0 Hz, 1H), 7.13 (d,  $J$  = 8.5 Hz, 1H, 5-H, 7-H), 7.57 (dd,  $J$  = 7.1, 8.6 Hz, 1H, 6-H), 7.63 (t,  $J$  = 5.8 Hz, 1H, NHCH<sub>2</sub>), 11.05 (br s, 1H, NH); <sup>13</sup>C NMR (126 MHz, DMSO-*d*<sub>6</sub>) δ 22.29 (C-4'), 28.20 (3 × CH), 31.12 (C-5'), 32.26 (C), 36.60 (3 × CH<sub>2</sub>), 38.47, 41.88 (NHCH<sub>2</sub>), 42.22 (3 × CH<sub>2</sub>), 48.72 (C-3'), 50.11 (COCH<sub>2</sub>), 69.06, 69.33, 69.69, 69.92, 69.95, 69.96 (OCH<sub>2</sub>), 109.43 (C-3a), 110.82 (C-7), 117.58 (C-5), 132.25 (C-7a), 136.35 (C-6), 146.58 (C-4), 167.42 (C-1), 169.08 (C-3), 170.10 (CO), 170.16 (C-2'), 172.89 (C-6'); **LC-MS** (ESI) (90% H<sub>2</sub>O to 100% MeOH in 10 min, then 100% MeOH to 20 min, DAD 220-500 nm),  $t_R$  = 11.47 min, 99% purity,  $m/z$  [M + H]<sup>+</sup> calcd for C<sub>33</sub>H<sub>44</sub>N<sub>4</sub>O<sub>8</sub>, 625.32; found, 625.4; **HRMS** (ESI)  $m/z$  [M + H]<sup>+</sup> calcd for C<sub>33</sub>H<sub>44</sub>N<sub>4</sub>O<sub>8</sub>, 625.3232; found, 625.3241.

### Hydrophobically tagged CRBN ligand **8d**

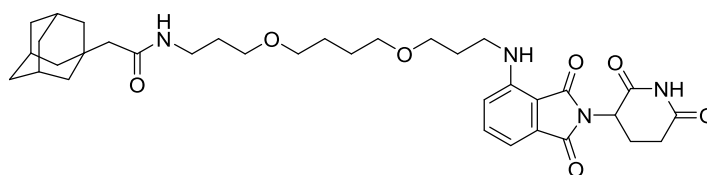

This compound was prepared using the General Procedure **XI** and compound **1e** (140 mg, 0.25 mmol). The crude product was purified by column chromatography (gradient of CH<sub>2</sub>Cl<sub>2</sub> to CH<sub>2</sub>Cl<sub>2</sub>/EtOH 29:1) to give a yellow solid.

Yield (91 mg, 57%); mp 68 – 70 °C; *R<sub>f</sub>* = 0.30 (CH<sub>2</sub>Cl<sub>2</sub>/EtOH 29:1); <sup>1</sup>H NMR (500 MHz, DMSO-*d*<sub>6</sub>) δ 1.47 – 1.68 (m, 18H, ), 1.74 – 1.84 (m, 4H, CH<sub>2</sub>, COCH<sub>2</sub>), 1.85 – 1.93 (m, 3H, CH), 1.97 – 2.06 (m, 1H, 4'-H), 2.45 – 2.63 (m, 2H, 4'-H, 5'-H), 2.74 – 2.97 (m, 1H, 5'-H), 2.97 – 3.15 (m, 2H, NHCH<sub>2</sub>), 3.30 – 3.40 (m, 8H, OCH<sub>2</sub>), 3.44 (t, *J* = 6.0 Hz, 2H, NHCH<sub>2</sub>), 5.03 (dd, *J* = 5.4, 12.7 Hz, 1H, 3'-H), 6.63 (t, *J* = 5.9 Hz, 1H, NHCH<sub>2</sub>), 7.01 (d, *J* = 7.0 Hz, 1H), 7.07 (d, *J* = 8.6 Hz, 1H, 5-H, 7-H), 7.45 – 7.68 (m, 2H, 6-H, NHCH<sub>2</sub>), 11.05 (br s, 1H, NH); <sup>13</sup>C NMR (126 MHz, DMSO-*d*<sub>6</sub>) δ 22.31 (C-4'), 26.14, 26.19 (CH<sub>2</sub>), 28.20 (3 × CH), 29.05, 29.66 (CH<sub>2</sub>), 31.12 (C-5'), 32.28 (C), 35.79 (NHCH<sub>2</sub>), 36.61 (3 × CH<sub>2</sub>), 42.28 (3 × CH<sub>2</sub>), 48.70 (C-3'), 50.23 (COCH<sub>2</sub>), 67.88, 68.00, 70.02, 70.19 (OCH<sub>2</sub>), 109.27 (C-3a), 110.52 (C-7), 117.18 (C-5), 132.37 (C-7a), 136.38 (C-6), 146.60 (C-4), 167.46 (C-1), 168.99 (C-3), 169.90 (CO), 170.18 (C-2'), 172.90 (C-6'). One signal for NHCH<sub>2</sub> is missing (overlapping solvent peaks); LC-MS (ESI) (90% H<sub>2</sub>O to 100% MeOH in 10 min, then 100% MeOH to 20 min, DAD 220-500 nm), *t<sub>R</sub>* = 12.07 min, 99% purity, *m/z* [M + H]<sup>+</sup> calcd for C<sub>35</sub>H<sub>48</sub>N<sub>4</sub>O<sub>7</sub>, 637.36; found, 637.5; HRMS (ESI) *m/z* [M + H]<sup>+</sup> calcd for C<sub>35</sub>H<sub>48</sub>N<sub>4</sub>O<sub>7</sub>, 637.3596; found, 637.3608.



## Hydrophobically tagged CRBN ligand **8e**

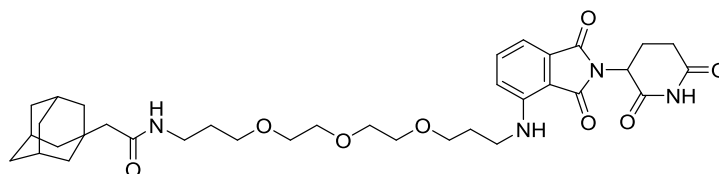

This compound was prepared using the General Procedure **XI** and compound **1f** (144 mg, 0.25 mmol). The crude product was purified by column chromatography (gradient of CH<sub>2</sub>Cl<sub>2</sub> to CH<sub>2</sub>Cl<sub>2</sub>/EtOH 19:1) to give a yellow solid.

Yield (122 mg, 75%); mp 64 – 66 °C; *R<sub>f</sub>* = 0.25 (CH<sub>2</sub>Cl<sub>2</sub>/EtOH 19:1); **<sup>1</sup>H NMR** (600 MHz, DMSO-*d*<sub>6</sub>) δ 1.48 – 1.66 (m, 14H, CH<sub>2</sub>), 1.75 – 1.83 (m, 4H, CH<sub>2</sub>, COCH<sub>2</sub>), 1.84 – 1.92 (m, 3H, CH), 1.97 – 2.05 (m, 1H, 4'-H), 2.45 – 2.62 (m, 2H, 4'-H, 5'-H), 2.81 – 2.92 (m, 1H, 5'-H), 3.03 (q, *J* = 6.6 Hz, 2H, NHCH<sub>2</sub>), 3.29 – 3.63 (m, 14H, OCH<sub>2</sub>, NHCH<sub>2</sub>), 5.03 (dd, *J* = 5.5, 12.9 Hz, 1H, 3'-H), 6.64 (t, *J* = 5.9 Hz, 1H, NHCH<sub>2</sub>), 7.00 (d, *J* = 7.1 Hz, 1H), 7.08 (d, *J* = 8.6 Hz, 1H, 5-H, 7-H), 7.51 – 7.67 (m, 2H, 6-H, NHCH<sub>2</sub>), 11.06 (br s, 1H, NH); **<sup>13</sup>C NMR** (151 MHz, DMSO-*d*<sub>6</sub>) δ 22.37 (C-4'), 28.24 (3 × CH), 29.09, 29.67 (CH<sub>2</sub>), 31.17 (C-5'), 32.34 (C), 35.82 (NHCH<sub>2</sub>), 36.65 (3 × CH<sub>2</sub>), 42.33 (3 × CH), 48.74 (C-3'), 50.28 (COCH<sub>2</sub>), 68.37, 68.42, 69.77, 69.90, 69.94, 69.99 (OCH<sub>2</sub>), 109.27 (C-3a), 110.59 (C-7), 117.30 (C-5), 132.40 (C-7a), 136.50 (C-6), 146.68 (C-4), 167.54 (C-1), 169.06 (C-3), 170.04 (CO), 170.28 (C-2'), 173.02 (C-6'). One signal for NHCH<sub>2</sub> is missing (overlapping solvent peaks); **LC-MS** (ESI) (90% H<sub>2</sub>O to 100% MeOH in 10 min, then 100% MeOH to 20 min, DAD 220-400 nm), *t<sub>R</sub>* = 11.70 min, 99% purity, *m/z* [M + H]<sup>+</sup> calcd for C<sub>35</sub>H<sub>48</sub>N<sub>4</sub>O<sub>8</sub>, 653.35; found, 653.5; **HRMS** (ESI) *m/z* [M + H]<sup>+</sup> calcd for C<sub>35</sub>H<sub>48</sub>N<sub>4</sub>O<sub>8</sub>, 653.3545; found, 653.3544.

## L. Synthesis of the VPMLK-tagged CRBN Ligand 9

(5*S*,8*S*)-*tert*-Butyl 5-isobutyl-16,16-dimethyl-3,6,14-trioxo-1-phenyl-2,15-dioxo-4,7,13-tri azahepta-decane-8-carboxylate (63)

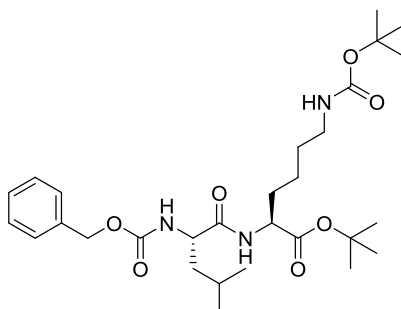

The acid component Cbz-Leu-OH (4.38 g, 16.5 mmol) was dissolved in dry THF (3.7 mL) and cooled at  $-25^{\circ}\text{C}$ . To the stirred solution, NMM (1.67 g, 1.82 mL, 16.5 mmol) and isobutyl chloroformate (2.25 g, 2.16 mL, 16.5 mmol) were added consecutively. The amine component *N*- $\epsilon$ -Boc-L-lysine *tert*-butyl ester hydrochloride (5.08 g, 15 mmol) was dissolved in dry THF (12 mL) and  $\text{Et}_3\text{N}$  (1.52 g, 2.08 mL, 15 mmol) was added. This was given to the reaction mixture when the precipitation of *N*-methylmorpholine hydrochloride occurred. The mixture was allowed to warm up to rt within 30 min and was stirred overnight. After evaporation of the solvent, the residue was dissolved in ethyl acetate (50 mL) and washed with 10%  $\text{KHSO}_4$  (30 mL),  $\text{H}_2\text{O}$  (30 mL), saturated  $\text{NaHCO}_3$  ( $2 \times 30$  mL),  $\text{H}_2\text{O}$  (30 mL) and brine (30-50 mL). The solvent was dried ( $\text{Na}_2\text{SO}_4$ ) and evaporated. The crude product was purified by column chromatography using  $\text{CH}_2\text{Cl}_2/\text{MeOH}$  29:1 to obtain the desired product as a colorless oil.

Yield (7.52 g, 91%);  $^1\text{H NMR}$  (500 MHz,  $\text{DMSO}-d_6$ )  $\delta$  0.85, 0.87 (each d,  $J = 7.2$  Hz, 6H,  $\text{CH}(\text{CH}_3)_2$ ), 1.23 – 1.30 (m, 2H,  $\text{CH}_2\text{CH}_2\text{CH}_2\text{CH}_2\text{NH}$ ), 1.32 – 1.35 (m, 2H,  $\text{CH}_2\text{CH}_2\text{CH}_2\text{CH}_2\text{NH}$ ), 1.36, 1.37 (each s, each 9H,  $\text{CHCOOC}(\text{CH}_3)_3$ ,  $\text{NHCOOC}(\text{CH}_3)_3$ ), 1.40 – 1.45 (m, 2H,  $\text{CH}_2\text{CH}_2\text{CH}_2\text{CH}_2\text{NH}$ ), 1.52 – 1.59 (m, 1H,  $\text{CH}(\text{CH}_3)_2$ ), 1.59 – 1.69 (m, 2H,  $\text{CH}_2\text{CH}(\text{CH}_3)_2$ ), 2.88 (q,  $J = 6.5$  Hz, 2H,  $\text{CH}_2\text{CH}_2\text{CH}_2\text{CH}_2\text{NH}$ ), 4.01 – 4.10 (m, 2H,  $\text{CHCH}_2\text{CH}(\text{CH}_3)_2$ ,  $\text{CHCH}_2\text{CH}_2\text{CH}_2\text{CH}_2\text{NH}$ ), 5.01 (s, 2H,  $\text{NHCOOCH}_2\text{Ph}$ ), 6.70 (t,  $J = 5.3$  Hz, 1H,  $\text{CH}_2\text{CH}_2\text{CH}_2\text{CH}_2\text{NH}$ ), 7.27 – 7.37 (m, 6H, 2-H – 6-H,  $\text{NHCOOCH}_2\text{Ph}$ ), 8.02 (d,  $J = 7.4$  Hz, 1H,  $\text{CHCONHCH}$ );  $^{13}\text{C NMR}$  (126 MHz,  $\text{DMSO}-d_6$ )  $\delta$  21.63 ( $\text{CH}_2\text{CH}_2\text{CH}_2\text{CH}_2\text{NH}$ ), 22.73 ( $\text{CH}(\text{CH}_3)_2$ ), 23.15 ( $\text{CH}(\text{CH}_3)_2$ ), 24.28 ( $\text{CH}(\text{CH}_3)_2$ ), 27.74, 28.40 ( $\text{NHCOOC}(\text{CH}_3)_3$ ,  $\text{CHCOOC}(\text{CH}_3)_3$ ), 29.19 ( $\text{CH}_2\text{CH}_2\text{CH}_2\text{CH}_2\text{NH}$ ), 30.76 ( $\text{CH}_2\text{CH}_2\text{CH}_2\text{CH}_2\text{NH}$ ), 40.29 ( $\text{CH}_2\text{CH}_2\text{CH}_2\text{CH}_2\text{NH}$ ), 40.97 ( $\text{CH}_2\text{CH}(\text{CH}_3)_2$ ), 52.81, 52.96 ( $\text{CHCH}_2\text{CH}_2\text{CH}_2\text{CH}_2\text{NH}$ ,  $\text{CHCH}_2\text{CH}(\text{CH}_3)_2$ ), 65.44 ( $\text{NHCOOCH}_2\text{Ph}$ ), 77.45, 80.48 ( $\text{NHCOOC}(\text{CH}_3)_3$ ,  $\text{CHCOOC}(\text{CH}_3)_3$ ), 127.75 (C-2, C-6), 127.87 (C-4), 128.43 (C-3, C-5), 137.22 (C-1), 155.69, 155.99 ( $\text{NHCOOC}(\text{CH}_3)_3$ ,  $\text{NHCOOCH}_2\text{Ph}$ ), 171.23 ( $\text{CHCONHCH}$ ), 172.50 ( $\text{CHCOOC}(\text{CH}_3)_3$ ); **LC-MS** (ESI) (90%  $\text{H}_2\text{O}$  to 100% MeCN in 10 min, then 100%

MeCN for 10 min, DAD 220-400 nm),  $t_R = 10.30$  min, 98% purity,  $m/z$   $[M + H]^+$  calcd for  $C_{29}H_{47}N_3O_7$ , 550.34; found, 550.3; **HRMS** (ESI)  $m/z$   $[M + H]^+$  calcd for  $C_{29}H_{47}N_3O_7$ , 550.3487; found, 550.3456.

**(5S,8S,11S)-tert-Butyl 8-isobutyl-19,19-dimethyl-5-(2-(methylthio)ethyl)-3,6,9,17-tetra oxo-1-phenyl-2,18-dioxa-4,7,10,16-tetraazaicosane-11-carboxylate (64)**

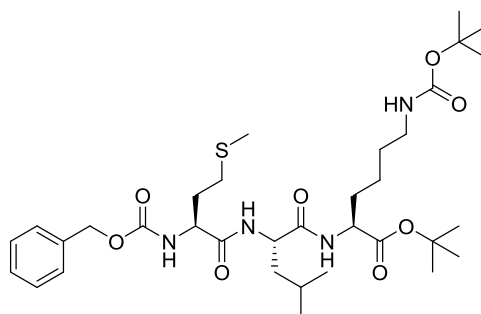

Compound **63** (8.25 g, 15 mmol) was dissolved in ethyl acetate (17 mL) and deprotected by hydrogenation with  $H_2$  over Pd/C (10%, 0.83 mg) at rt over 24 h. Filtration of Pd/C over a celite pad and evaporation of the solvent yielded the derivative H-Leu-Lys(Boc)-OtBu that was used as amine component as described below. The acid component Cbz-Met-OH (4.25 g, 15 mmol) was dissolved in dry THF (17 mL) and cooled to  $-25$  °C. To the stirred solution, NMM (2.23 g, 2.42 mL, 22 mmol) and isobutyl chloroformate (3.00 g, 2.86 mL, 22 mmol) were added consecutively. The amine component H-Leu-Lys(Boc)-OtBu was dissolved in dry THF (5 mL) and added to the reaction mixture when the precipitation of *N*-methylmorpholine hydrochloride occurred. The mixture was allowed to warm up to rt within 30 min and was stirred overnight. After evaporation of the solvent, the residue was dissolved in ethyl acetate (56 mL) and washed with 10%  $KHSO_4$  solution (33 mL),  $H_2O$  (33 mL), saturated  $NaHCO_3$  solution ( $2 \times 33$  mL),  $H_2O$  (33 mL) and brine (50 mL). The solvent was dried ( $Na_2SO_4$ ) and evaporated. The crude product was purified by column chromatography (gradient of petroleum ether/EtOAc 2:1 to 1:1) to obtain the desired product as a colorless solid.

Yield (7.05 g, 69%); mp  $110 - 114$  °C;  $^1H$  NMR (500 MHz,  $DMSO-d_6$ )  $\delta$  0.84, 0.88 (each d,  $J = 6.5$  Hz, 6H,  $CH_2CH(CH_3)_2$ ), 1.21 – 1.30 (m, 2H,  $CH_2CH_2CH_2CH_2NH$ ), 1.31 – 1.35 (m, 2H,  $CH_2CH_2CH_2CH_2NH$ ), 1.35, 1.37 (each s, each 9H,  $CHCOOC(CH_3)_3$ ,  $NHCOOC(CH_3)_3$ ), 1.41 – 1.49 (m, 2H,  $CH_2CH_2CH_2CH_2NH$ ), 1.51 – 1.57 (m, 1H,  $CH_2CH(CH_3)_2$ ), 1.57 – 1.67 (m, 2H,  $CH_2CH(CH_3)_2$ ), 1.74 – 1.82 (m, 1H,  $CH_2CH_2SCH_3$ ), 1.82 – 1.90 (m, 1H,  $CH_2CH_2SCH_3$ ), 2.01 (s, 3H,  $CH_2CH_2SCH_3$ ), 2.41 – 2.46 (m, 2H,  $CH_2CH_2SCH_3$ ), 2.88 (q,  $J = 6.6$  Hz, 2H,  $CH_2CH_2CH_2CH_2NH$ ), 4.02 (q,  $J = 7.1$  Hz, 1H,  $CHCH_2CH_2CH_2CH_2NH$ ), 4.09 (dt,  $J = 8.5$  Hz,  $J = 5.0$  Hz, 1H,  $CHCH_2CH(CH_3)_2$ ), 4.34 (dt,  $J = 8.8$  Hz,  $J = 5.7$  Hz, 1H,  $CHCH_2CH_2SCH_3$ ), 5.02 (s, 2H,  $NHCOOCH_2Ph$ ), 6.70 (t,  $J = 5.5$  Hz, 1H,  $NHCOOC(CH_3)_3$ ), 7.27 – 7.37 (m, 5H, 2-H – 6-H), 7.43 (d,  $J = 8.1$  Hz, 1H,  $NHCOOCH_2Ph$ ),

7.86 (d,  $J = 8.3$  Hz, 1H, CHCONHCHCONH), 8.05 (d,  $J = 7.3$  Hz, 1H, CHCONHCHCONH);  $^{13}\text{C}$  NMR (126 MHz, DMSO- $d_6$ )  $\delta$  14.73 (SCH<sub>3</sub>, CH<sub>2</sub>CH<sub>2</sub>SCH<sub>3</sub>), 21.81 (CH<sub>2</sub>CH<sub>2</sub>CH<sub>2</sub>CH<sub>2</sub>NH), 22.72 (CH<sub>2</sub>CH(CH<sub>3</sub>)<sub>2</sub>), 23.17 (CH<sub>2</sub>CH(CH<sub>3</sub>)<sub>2</sub>), 24.22 (CH<sub>2</sub>CH(CH<sub>3</sub>)<sub>2</sub>), 27.73, 28.39 (CHCOOC(CH<sub>3</sub>)<sub>3</sub>, NHCOOC(CH<sub>3</sub>)<sub>3</sub>), 29.21 (CH<sub>2</sub>CH<sub>2</sub>SCH<sub>3</sub>), 29.75 (CH<sub>2</sub>CH<sub>2</sub>CH<sub>2</sub>CH<sub>2</sub>NH), 30.71 (CH<sub>2</sub>CH<sub>2</sub>CH<sub>2</sub>CH<sub>2</sub>NH), 40.29 (CH<sub>2</sub>CH<sub>2</sub>CH<sub>2</sub>CH<sub>2</sub>NH) 41.20 (CH<sub>2</sub>CH(CH<sub>3</sub>)<sub>2</sub>), 50.79, 52.87, 54.04 (CHCH<sub>2</sub>CH(CH<sub>3</sub>)<sub>2</sub>), CHCH<sub>2</sub>CH<sub>2</sub>CH<sub>2</sub>CH<sub>2</sub>NH, CHCH<sub>2</sub>CH<sub>2</sub>SCH<sub>3</sub>), 65.53 (NHCOOCH<sub>2</sub>Ph), 77.44, 80.46 (NHCOOC(CH<sub>3</sub>)<sub>3</sub>, CHCOOC(CH<sub>3</sub>)<sub>3</sub>), 127.75 (C-2, C-6), 127.87 (C-4), 128.43 (C-3, C-5), 137.13 (C-1), 155.67, 156.03 (NHCOOC(CH<sub>3</sub>)<sub>3</sub>, NHCOOCH<sub>2</sub>Ph), 171.12, 171.20, 172.06 (CHCONHCHCO, CHCOOC(CH<sub>3</sub>)<sub>3</sub>); **LC-MS** (ESI) (90% H<sub>2</sub>O to 100% MeOH in 10 min, then 100% MeOH for 10 min, DAD 220-400 nm),  $t_R = 11.92$  min, 98% purity,  $m/z$  [M + H]<sup>+</sup> calcd for C<sub>34</sub>H<sub>56</sub>N<sub>4</sub>O<sub>8</sub>S, 681.39; found, 681.4; **HRMS** (ESI)  $m/z$  [M + H]<sup>+</sup> calcd for C<sub>34</sub>H<sub>56</sub>N<sub>4</sub>O<sub>8</sub>S, 681.3892; found, 681.3877.

**(S)-tert-Butyl 1-((S)-2-(benzyloxycarbonylamino)-3-methylbutanoyl)pyrrolidine-2-carboxylate (65)**

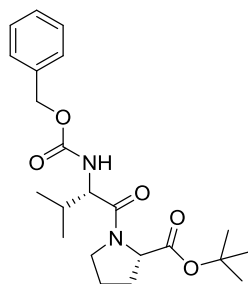

Cbz-Val-OH (1.26 g, 5 mmol) was dissolved in dry THF (7.5 mL) and cooled to  $-25$  °C. To the stirred solution, NMM (0.51 g, 0.55 mL, 5 mmol) and isobutyl chloroformate (0.68 g, 0.65 mL, 5 mmol) were added consecutively. H-Pro-OtBu hydrochloride (1.14 g, 5.5 mmol) was dissolved in dry THF (12 mL) and Et<sub>3</sub>N (0.56 g, 0.76 mL, 5.5 mmol) was added. This was added to the reaction mixture when the precipitation of *N*-methylmorpholine hydrochloride occurred. The mixture was allowed to warm up to rt within 30 min and was stirred overnight. After evaporation of the solvent, the residue was dissolved in EtOAc (50 mL) and washed with 10% KHSO<sub>4</sub> solution (30 mL), H<sub>2</sub>O (30 mL), saturated NaHCO<sub>3</sub> solution (2 × 30 mL), H<sub>2</sub>O (30 mL) and brine (30-50 mL). The solvent was dried over Na<sub>2</sub>SO<sub>4</sub> and evaporated. The crude product was purified by column chromatography (gradient of petroleum ether/EtOAc 2:1 to 1:1) to obtain the desired product as a colorless oil.

Yield (0.75 g, 38%);  $^1\text{H}$  NMR (600 MHz, DMSO- $d_6$ )  $\delta$  0.88 (d,  $J = 5.6$  Hz, 3H, CHCH(CH<sub>3</sub>)<sub>2</sub>), 0.93 (d,  $J = 5.7$  Hz, 3H, CHCH(CH<sub>3</sub>)<sub>2</sub>), 1.37 (s, 9H, (CH<sub>3</sub>)<sub>3</sub>), 1.73 – 1.81 (m, 1H, proline CH<sub>2</sub>), 1.81 – 1.99 (m, 3H, proline CH<sub>2</sub>), 2.08 – 2.18 (m, 1H, CH(CH<sub>3</sub>)<sub>2</sub>), 3.52 – 3.59 (m, 1H, proline NCH<sub>2</sub>), 3.70 – 3.78 (m, 1H, proline NCH<sub>2</sub>), 4.06 (t,  $J = 6.9$  Hz, 1H, proline CH), 4.17 (dd,  $J = 4.3, 7.2$  Hz, Hz, 1H, CHCH(CH<sub>3</sub>)<sub>2</sub>), 4.98 and 5.03 (each d,  $J = 12.7$  Hz and  $J = 12.7$  Hz, 2H, NHCOOCH<sub>2</sub>Ph), 7.27 – 7.38 (m, 5H, 2-H – 6-H), 7.41 (d,  $J = 7.1$  Hz, 1H,

NH);  $^{13}\text{C}$  NMR (151 MHz, DMSO- $d_6$ )  $\delta$  18.49 (( $\text{CH}_3$ ) $_2$ ), 19.11 (( $\text{CH}_3$ ) $_2$ ), 24.69 (proline  $\text{CH}_2$ ), 27.75 (( $\text{CH}_3$ ) $_3$ ), 28.87 (proline  $\text{CH}_2$ ), 29.93 ( $\underline{\text{C}}\text{H}(\text{CH}_3)_2$ ), 46.97 (proline  $\text{NCH}_2$ ), 57.88 ( $\underline{\text{C}}\text{HCH}(\text{CH}_3)_2$ ), 59.58 (proline  $\text{CH}$ ), 65.57 ( $\text{NHCOOCH}_2\text{Ph}$ ), 80.45 ( $\underline{\text{C}}(\text{CH}_3)_3$ ), 127.81 (C-2, C-6), 127.93 (C-4) 128.49 (C-3, C-5), 137.22 (C-1), 156.35 ( $\text{NHCOOCH}_2$ ), 170.28 ( $\underline{\text{C}}\text{OOC}(\text{CH}_3)_3$ ), 171.15 ( $\text{CHNHCOCH}$ ); **LC-MS** (ESI) (90%  $\text{H}_2\text{O}$  to 100% MeOH in 10 min, then 100% MeOH for 10 min, DAD 220-400 nm),  $t_R$  = 11.28 min, 99% purity,  $m/z$  [ $\text{M} + \text{H}$ ] $^+$  calcd for  $\text{C}_{22}\text{H}_{32}\text{N}_2\text{O}_5$ , 405.23; found, 405.3; **HRMS** (ESI)  $m/z$  [ $\text{M} + \text{H}$ ] $^+$  calcd for  $\text{C}_{22}\text{H}_{32}\text{N}_2\text{O}_5$ , 405.2384; found, 405.2362.

**(S)-tert-Butyl 2-((S)-2-((S)-2-((S)-1-((S)-2-(benzyloxycarbonylamino)-3-methylbutanoyl) pyrrolidine-2-carboxamido)-4-(methylthio)butanamido)-4-methylpentanamido)-6-(tert-butoxycarbonylamino) hexanoate (66)**

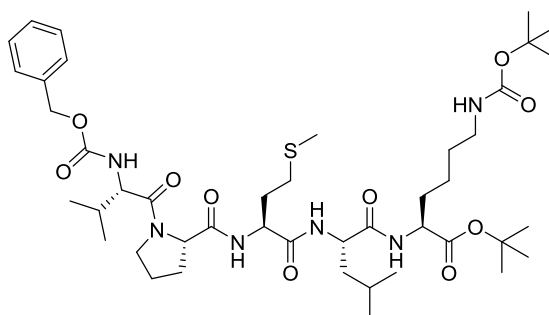

Cbz-Met-Leu-Lys(Boc)-OtBu (**64**, 0.81 g, 1.2 mmol) was dissolved in MeOH (10 mL) and deprotected by hydrogenation over  $\text{Pd}(\text{OH})_2/\text{C}$  (20%, 167 mg) at rt for 5 h at 60 psi. Filtration of  $\text{Pd}(\text{OH})_2/\text{C}$  over a celite pad and evaporation of the solvent yielded the derivative H-Met-Leu-Lys(Boc)-OtBu that was used as amine component as described below.

To deprotect the dipeptide Cbz-Val-Pro-OtBu (**65**, 0.98 g, 2.4 mmol), it was dissolved in dry  $\text{CH}_2\text{Cl}_2$ /trifluoroacetic acid 1:1 (10 mL) and stirred at 40 °C for 2 h. Removal of the solvent, coevaporation with  $\text{CH}_2\text{Cl}_2$  (4  $\times$  5 mL) and further drying *in vacuo* yielded the crude acid derivative, which was redissolved in dry MeCN (10 mL). After stirring of this light yellow solution together with HBTU (1.14 g, 3.0 mmol) and DIPEA (0.93 g, 1.25 mL, 7.2 mmol) for 10 min at rt, the amine component H-Met-Leu-Lys(Boc)-OtBu in dry MeCN (10 mL) and DIPEA (0.31 g, 0.42 mL, 2.4 mmol) was added. The combined mixture was stirred at rt for 12 h. The yellow solution was then diluted with EtOAc (200 mL) and washed with 10%  $\text{KHSO}_4$  solution,  $\text{H}_2\text{O}$ , saturated  $\text{NaHCO}_3$  solution,  $\text{H}_2\text{O}$  and brine (each 25 mL). The yellow organic layer was dried over  $\text{Na}_2\text{SO}_4$ , filtrated and concentrated. The crude material was twice purified by column chromatography (gradient of  $\text{CH}_2\text{Cl}_2/\text{MeOH}$  39:1 to 29:1) to obtain a colorless oil, which was subjected

to a further purification by reversed-phase flash chromatography (20% H<sub>2</sub>O, 80% MeCN) to obtain a colorless solid.

Yield (0.23 g, 28%); mp 86 – 90 °C; <sup>1</sup>H NMR (500 MHz, DMSO-*d*<sub>6</sub>) δ 0.77 – 0.92 (m, 12H, CH<sub>2</sub>CH(CH<sub>3</sub>)<sub>2</sub>, CHCH(CH<sub>3</sub>)<sub>2</sub>), 1.22 – 1.28 (m, 2H, CH<sub>2</sub>CH<sub>2</sub>CH<sub>2</sub>CH<sub>2</sub>NH), 1.29 – 1.34 (m, 2H, CH<sub>2</sub>CH<sub>2</sub>CH<sub>2</sub>CH<sub>2</sub>NH), 1.36 (each s, each 9H, CHCOOC(CH<sub>3</sub>)<sub>3</sub>, NHCOOC(CH<sub>3</sub>)<sub>3</sub>), 1.39 – 1.46 (m, 2H, CH<sub>2</sub>CH<sub>2</sub>CH<sub>2</sub>CH<sub>2</sub>NH), 1.46 – 1.71 (m, 4H, CH<sub>2</sub>CH(CH<sub>3</sub>)<sub>2</sub>, CH<sub>2</sub>CH(CH<sub>3</sub>)<sub>2</sub>, proline CH<sub>2</sub>), 1.71 – 1.99 (m, 6H, CH<sub>2</sub>CH<sub>2</sub>SCH<sub>3</sub>, CHCH(CH<sub>3</sub>)<sub>2</sub>, proline CH<sub>2</sub>), 2.01 (s, 3H, CH<sub>2</sub>CH<sub>2</sub>SCH<sub>3</sub>), 2.37 – 2.44 (m, 1H, CH<sub>2</sub>CH<sub>2</sub>SCH<sub>3</sub>), 2.44 – 2.48 (m, 1H, CH<sub>2</sub>CH<sub>2</sub>SCH<sub>3</sub>), 2.88 (q, *J* = 6.6 Hz, 2H, CH<sub>2</sub>CH<sub>2</sub>CH<sub>2</sub>CH<sub>2</sub>NH), 3.50 – 3.61 (m, 1H, proline NCH<sub>2</sub>), 3.66 – 3.76 (m, 1H, proline NCH<sub>2</sub>), 3.97 – 4.07 (m, 2H, CHCH<sub>2</sub>CH<sub>2</sub>CH<sub>2</sub>CH<sub>2</sub>NH, CHCH<sub>2</sub>CH(CH<sub>3</sub>)<sub>2</sub>), 4.24 – 4.37 (m, 3H, CHCH<sub>2</sub>CH<sub>2</sub>SCH<sub>3</sub>, proline CH, CHCH(CH<sub>3</sub>)<sub>2</sub>), 5.00 (d, *J* = 13.6 Hz, 1H, NHCOOCH<sub>2</sub>Ph), 5.06 (d, *J* = 13.6 Hz, 1H, NHCOOCH<sub>2</sub>Ph), 6.70 (t, *J* = 5.3 Hz, 1H, CH<sub>2</sub>CH<sub>2</sub>CH<sub>2</sub>CH<sub>2</sub>NH), 7.27 – 7.41 (m, 6H, 2-H - 6-H, CHNHCO), 7.77 (d, *J* = 8.3 Hz, 1H, CHNHCO), 8.00 (t, *J* = 7.8 Hz, 2H, CHNHCO); <sup>13</sup>C NMR (126 MHz, DMSO-*d*<sub>6</sub>) δ 14.80 (CH<sub>2</sub>CH<sub>2</sub>SCH<sub>3</sub>), 18.66, 19.12 (CHCH(CH<sub>3</sub>)<sub>2</sub>), 21.78 (CH<sub>2</sub>CH<sub>2</sub>CH<sub>2</sub>CH<sub>2</sub>NH), 22.73, 23.15 (CH<sub>2</sub>CH(CH<sub>3</sub>)<sub>2</sub>), 24.23 (proline CH<sub>2</sub>), 24.67 (CH<sub>2</sub>CH(CH<sub>3</sub>)<sub>2</sub>), 27.74, 28.41 (NHCOOC(CH<sub>3</sub>)<sub>3</sub>, CHCOOC(CH<sub>3</sub>)<sub>3</sub>), 29.10 (CH<sub>2</sub>CH<sub>2</sub>SCH<sub>3</sub>), 29.23 (proline CH<sub>2</sub>), 29.58 (CH<sub>2</sub>CH<sub>2</sub>CH<sub>2</sub>CH<sub>2</sub>NH), 29.97 (CH<sub>2</sub>CH<sub>2</sub>CH<sub>2</sub>CH<sub>2</sub>NH), 30.74 (CHCH(CH<sub>3</sub>)<sub>2</sub>), 32.15 (CH<sub>2</sub>CH<sub>2</sub>SCH<sub>3</sub>), 40.29 (CH<sub>2</sub>CH<sub>2</sub>CH<sub>2</sub>CH<sub>2</sub>NH), 41.19 (CH<sub>2</sub>CH(CH<sub>3</sub>)<sub>2</sub>), 47.28 (proline NCH<sub>2</sub>), 50.82 (CHCH<sub>2</sub>CH(CH<sub>3</sub>)<sub>2</sub>), 52.06 (CHCH<sub>2</sub>CH<sub>2</sub>CH<sub>2</sub>CH<sub>2</sub>NH), 52.83 (CHCH<sub>2</sub>CH<sub>2</sub>SCH<sub>3</sub>), 58.11, 59.51 (CHCH(CH<sub>3</sub>)<sub>2</sub>, proline CH), 65.55 (NCOOCH<sub>2</sub>Ph), 77.47, 80.51 (NHCOOC(CH<sub>3</sub>)<sub>3</sub>, CHCOOC(CH<sub>3</sub>)<sub>3</sub>), 127.77 (C-2, C-6), 127.90 (C-4), 128.47 (C-3, C-5), 137.22 (C-1), 155.69 (NHCOOC(CH<sub>3</sub>)<sub>3</sub>), 156.36 (NCOOCH<sub>2</sub>Ph), 170.44, 170.81, 171.12, 171.74, 171.99 (CHCOOC(CH<sub>3</sub>)<sub>3</sub>, CHNHCOCH, CHNCOCH); LC-MS (ESI) (90% H<sub>2</sub>O to 100% MeOH in 10 min, then 100% MeOH for 10 min, DAD 220-400 nm), *t*<sub>R</sub> = 11.24 min, 94% purity, *m/z* [M + H]<sup>+</sup> calcd for C<sub>44</sub>H<sub>72</sub>N<sub>6</sub>O<sub>10</sub>S, 877.51; found, 877.6; HRMS (ESI) *m/z* [M + H]<sup>+</sup> calcd for C<sub>44</sub>H<sub>72</sub>N<sub>6</sub>O<sub>10</sub>S, 877.5103; found, 877.5119.

**(2S)-tert-Butyl 6-(tert-butoxycarbonylamino)-2-((2S)-2-((2S)-2-((2S)-1-((2S)-20-(2-(2,6-dioxopiperidin-3-yl)-1,3-dioxoisindolin-4-ylamino)-2-isopropyl-4,7-dioxo-12,17-dioxo-3,8-diazaicosan-1-oyl)pyrrolidine-2-carboxamido)-4-(methylthio)butanamido)-4-methylpentanamido)hexanoate (67)**

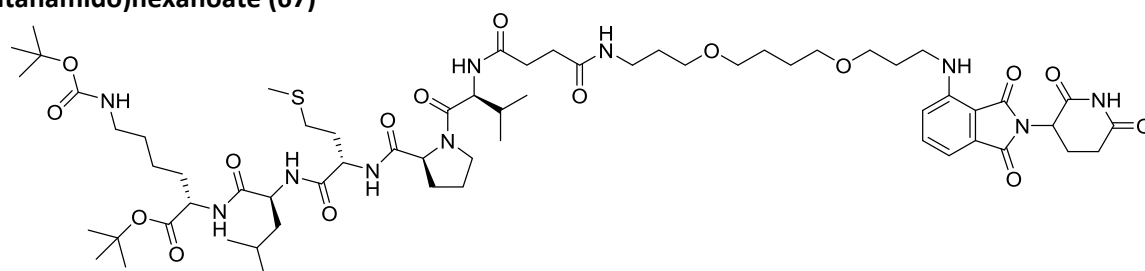

Pentapeptid **66** (0.20 g, 0.27 mmol) was stirred in HCl/dioxane (4N, 10 mL) for 4 h at rt. The solvent was evaporated and it was coevaporated with dry CH<sub>2</sub>Cl<sub>2</sub> (4 × 5 mL) and further dried *in vacuo*.

In a separate flask, compound **2d** (0.20 g, 0.32 mmol) was dissolved in dry CH<sub>2</sub>Cl<sub>2</sub> (5 mL) and trifluoroacetic acid (5 mL) was added. The mixture was stirred for 2 h at 40 °C. The solvent was evaporated and it was coevaporated with dry CH<sub>2</sub>Cl<sub>2</sub> (4 × 5 mL) and further dried *in vacuum*. The crude acid was dissolved in dry DMF (10 mL) and DIPEA (124 mg, 167 μL, 0.96 mmol) and HATU (134 mg, 0.352 mmol) were added. After stirring this solution for 10 min, the deprotected pentapeptid in dry DMF (5 mL) and DIPEA (35 mg, 47 μL, 0.267 mmol) was added. The combined mixture was stirred for 48 h at rt. The yellow mixture was diluted with CH<sub>2</sub>Cl<sub>2</sub> (200 mL) and it was washed with 10% KHSO<sub>4</sub> solution, H<sub>2</sub>O, saturated NaHCO<sub>3</sub> solution, H<sub>2</sub>O and brine (each 25 mL). The organic layer was dried over Na<sub>2</sub>SO<sub>4</sub>, filtered, and concentrated *in vacuo*. The crude product was purified by column chromatography (gradient of CH<sub>2</sub>Cl<sub>2</sub>/EtOH 25:1 to 9:1).

Yield (207 mg, 60%); mp 96 – 98 °C; *R<sub>f</sub>* = 0.25 (CH<sub>2</sub>Cl<sub>2</sub>/EtOH 19:1); **LC-MS** (ESI) (90% H<sub>2</sub>O to 100% MeCN in 10 min, then 100% MeCN for 10 min, DAD 220-450 nm), *t<sub>R</sub>* = 9.58 min, 98% purity, *m/z* [M + H]<sup>+</sup> calcd for C<sub>63</sub>H<sub>100</sub>N<sub>10</sub>O<sub>16</sub>S, 1285.71; found, 1285.5; **HRMS** (ESI) *m/z* [M + H]<sup>+</sup> calcd for C<sub>63</sub>H<sub>100</sub>N<sub>10</sub>O<sub>16</sub>S, 1285.7112; found, 1285.6843.

### VPMLK-tagged CRBN ligand 9

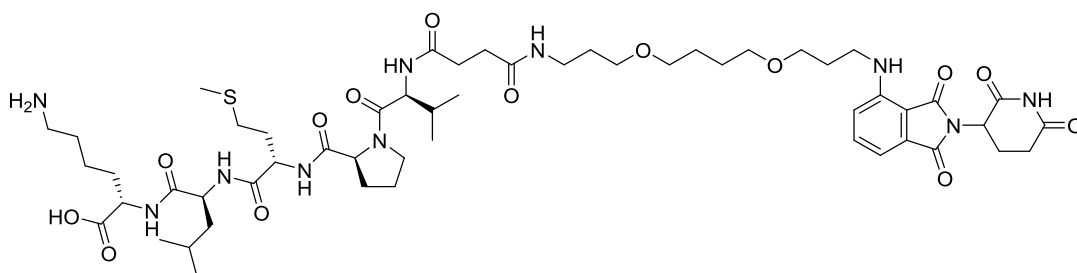

Compound **67** (30.4 mg, 23.6  $\mu\text{mol}$ ) was deprotected through stirring with dry  $\text{CH}_2\text{Cl}_2$ /trifluoroacetic acid 1:1 (10 mL) for 2 h at 40  $^\circ\text{C}$ . Subsequently, the solvent was removed and it was coevaporated with dry  $\text{CH}_2\text{Cl}_2$  (4  $\times$  5 mL). The crude product was further dried *in vacuo* and gave a yellow resin.

Yield (quant.); **LC-MS** (ESI) (90%  $\text{H}_2\text{O}$  to 100% MeCN in 10 min, then 100% MeCN for 10 min, DAD 220-450 nm),  $t_{\text{R}}$  = 6.92 min, 94% purity,  $m/z$   $[\text{M} + \text{H}]^+$  calcd for  $\text{C}_{54}\text{H}_{84}\text{N}_{10}\text{O}_{14}\text{S}$ , 1129.59; found, 1130.0; **HRMS** (ESI)  $m/z$   $[\text{M} + \text{H}]^+$  calcd for  $\text{C}_{54}\text{H}_{84}\text{N}_{10}\text{O}_{14}\text{S}$ , 1129.5962; found, 1129.5924.



## M. Selected $^1\text{H}$ and $^{13}\text{C}$ NMR Spectra

$^1\text{H}$  and  $^{13}\text{C}$  NMR spectrum of compound **18**.

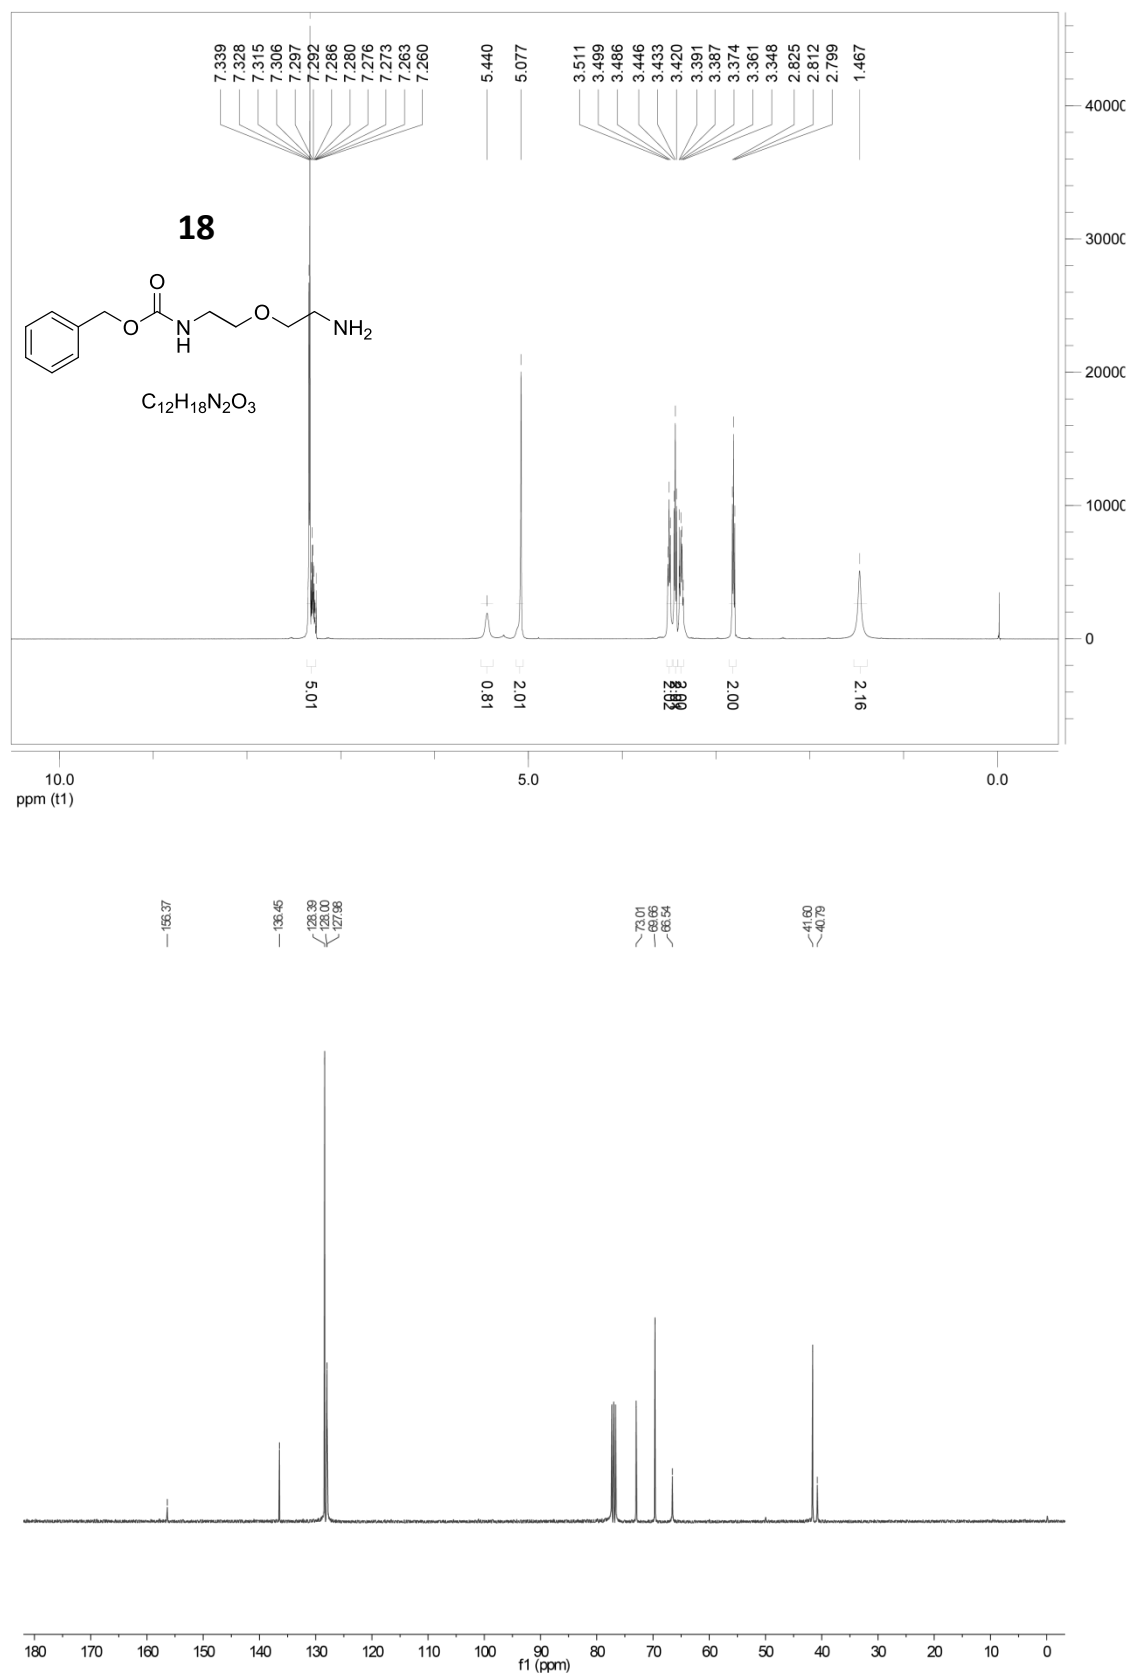

$^1\text{H}$  and  $^{13}\text{C}$  NMR spectrum of compound **19**.

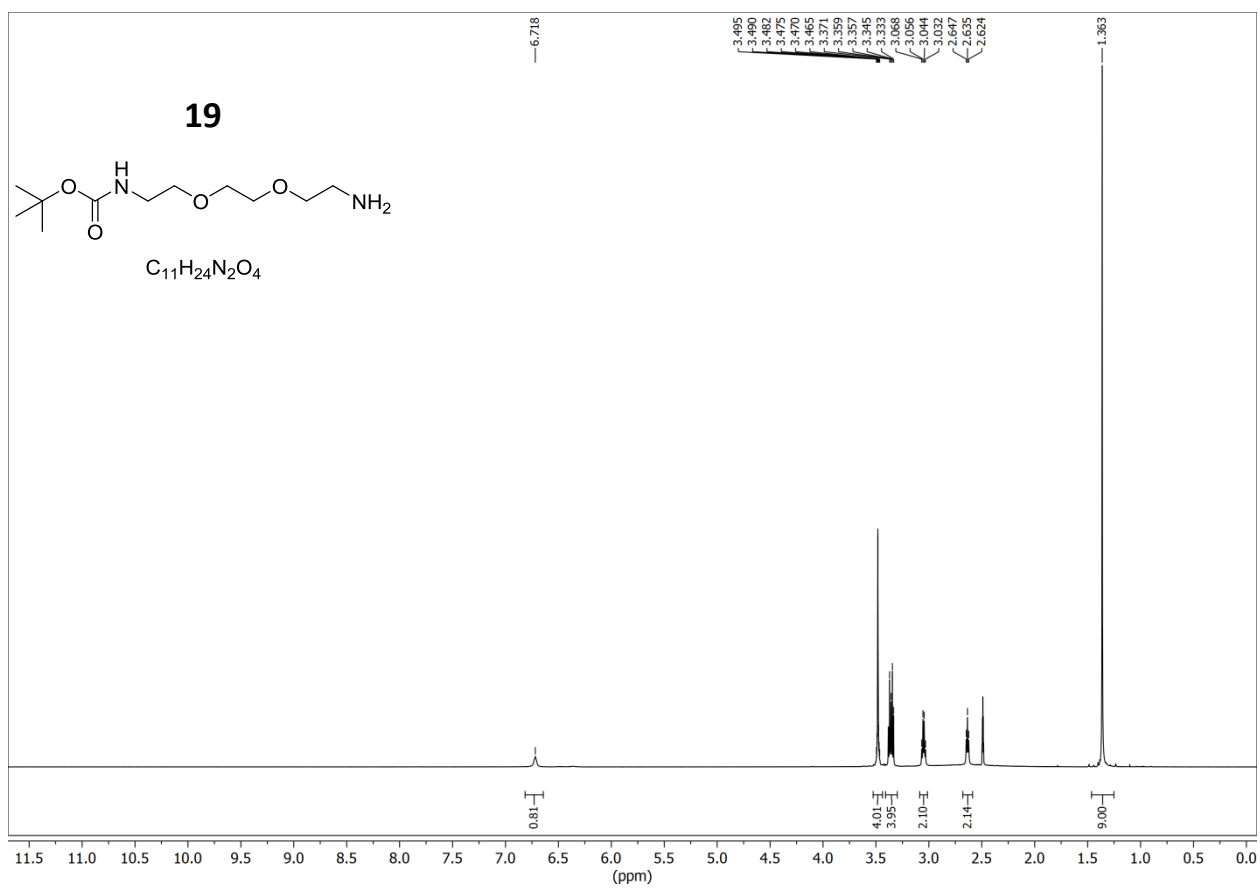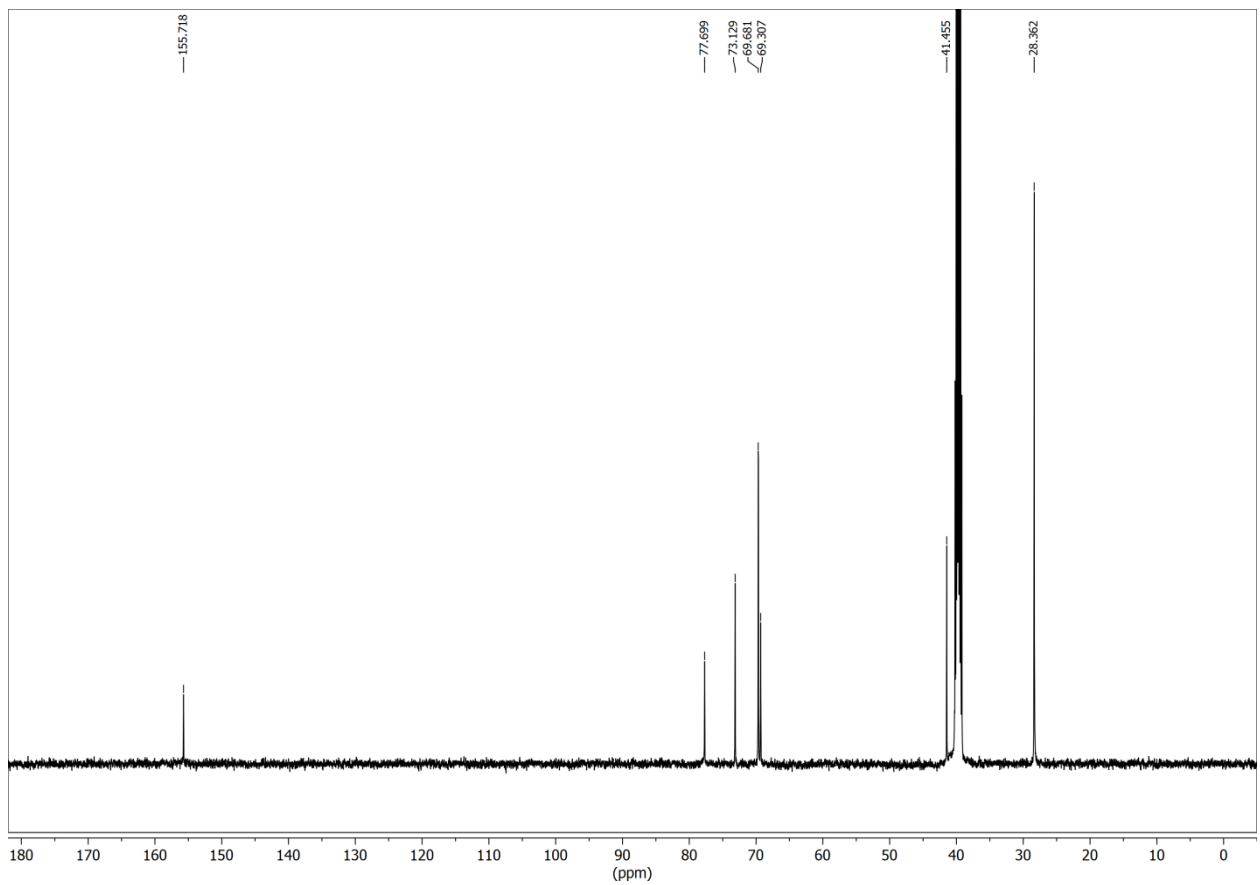

$^1\text{H}$  and  $^{13}\text{C}$  NMR spectrum of compound **1b**.

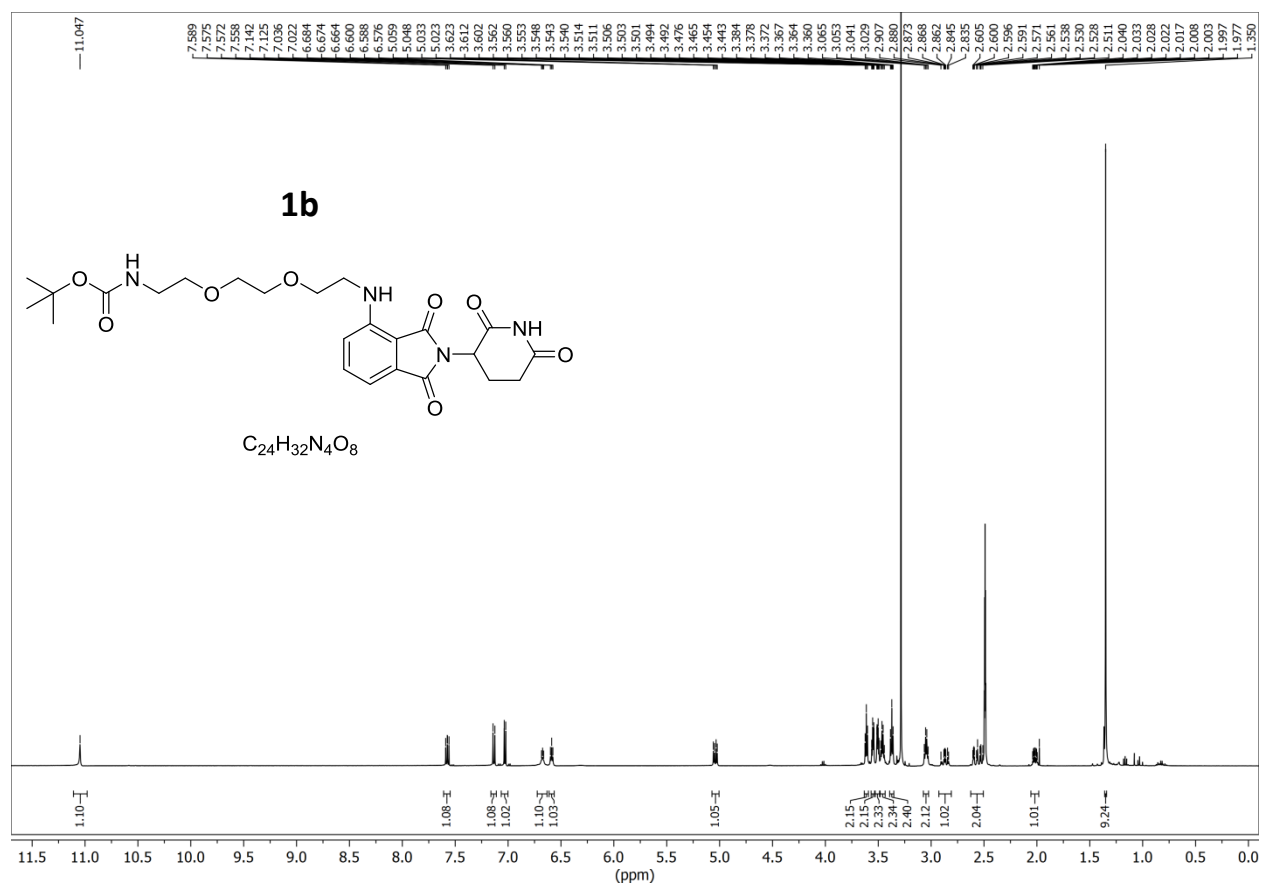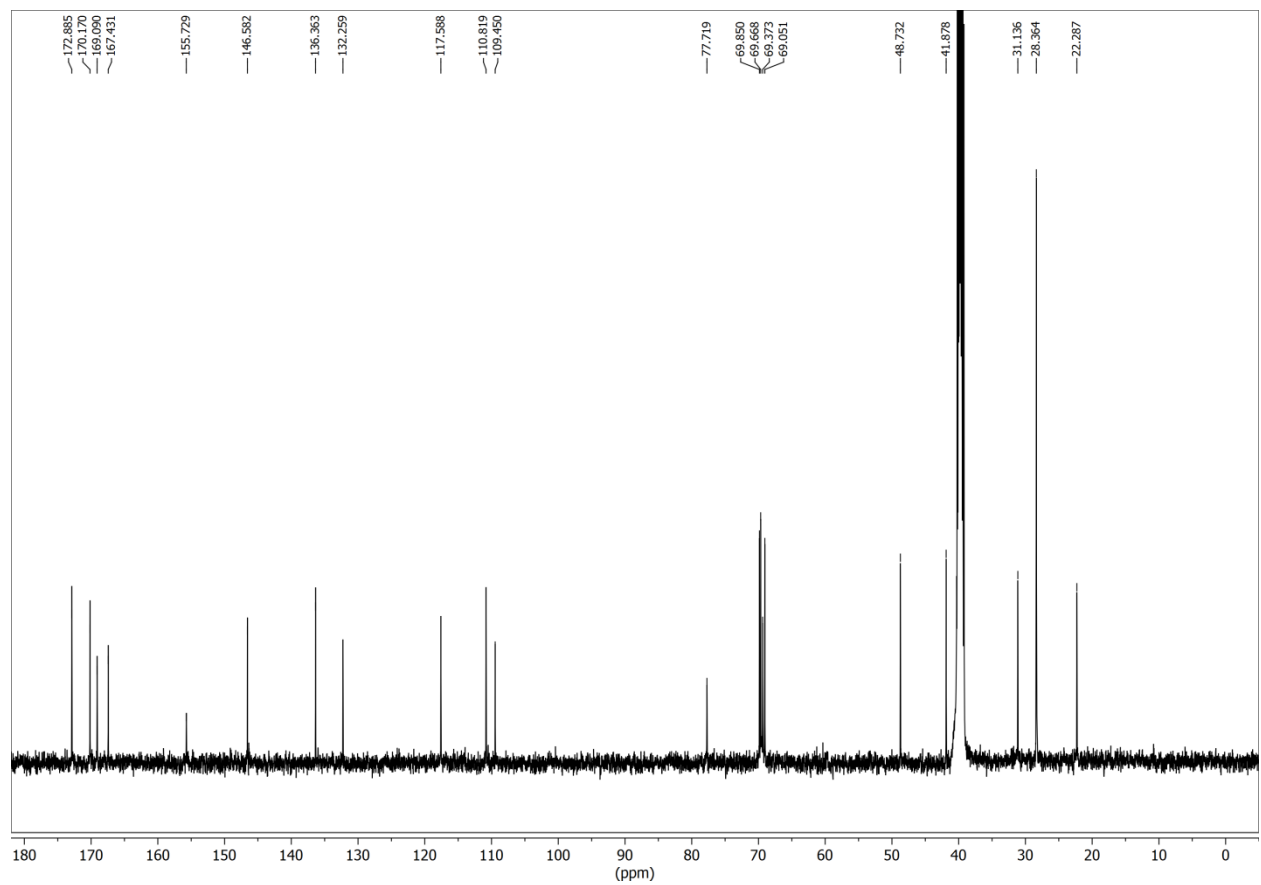

$^1\text{H}$  and  $^{13}\text{C}$  NMR spectrum of compound **2d**.

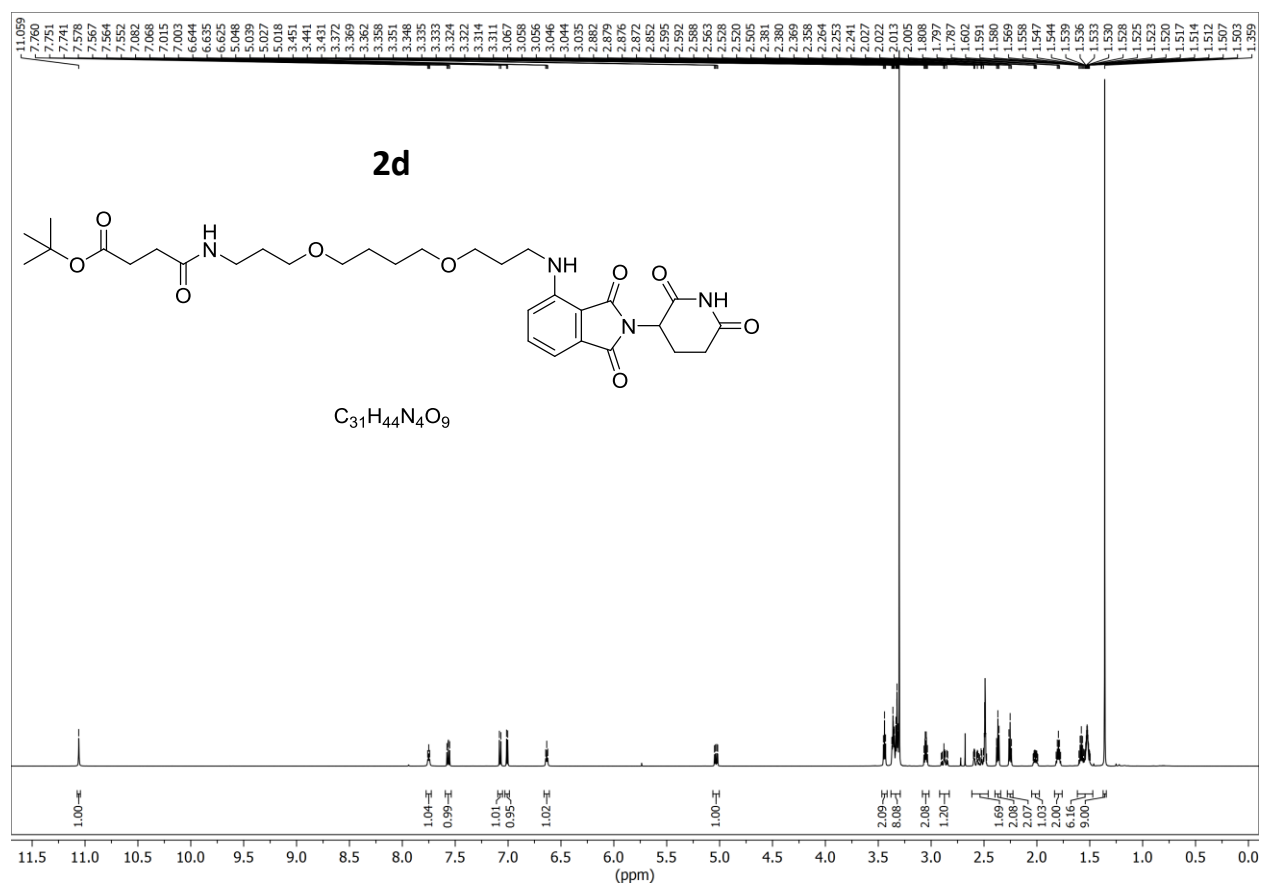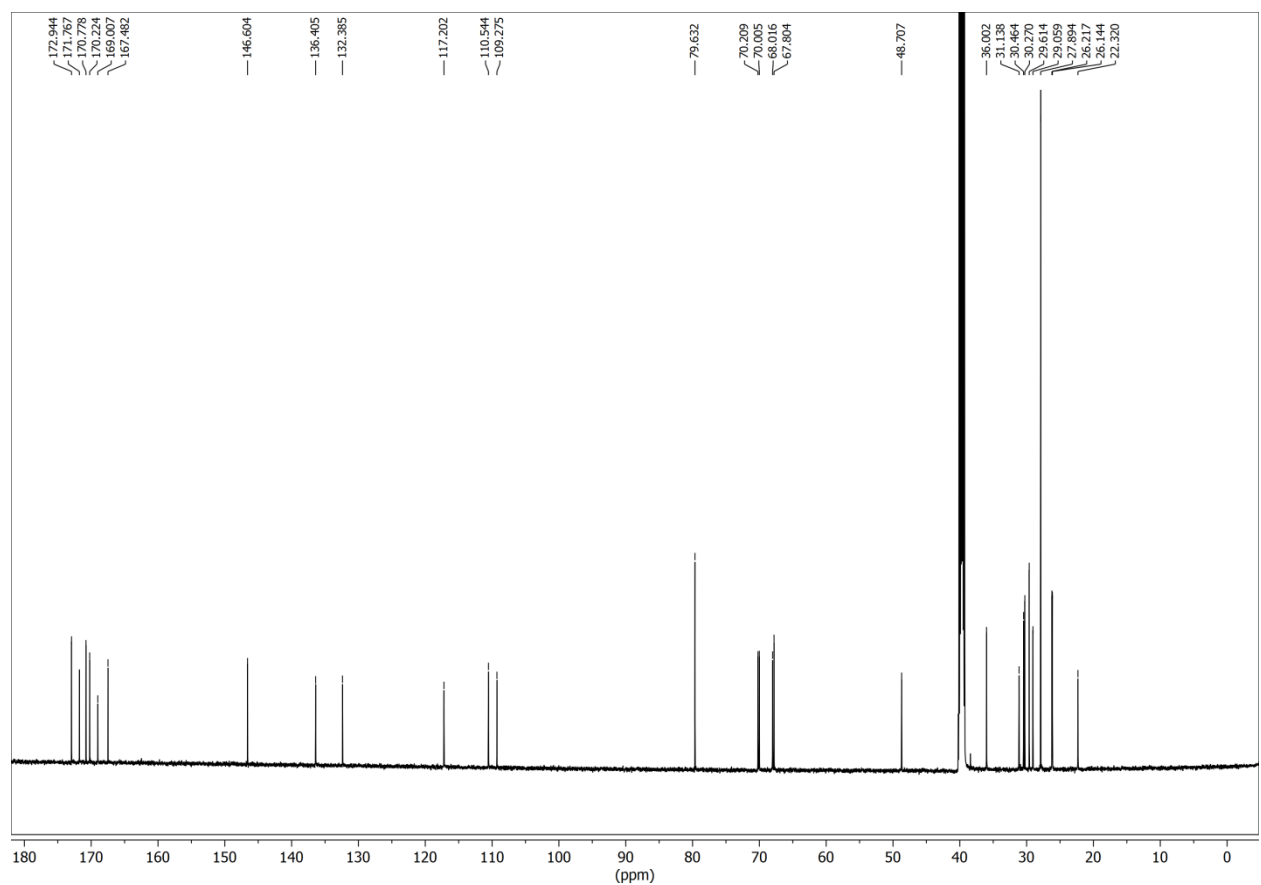

<sup>1</sup>H and <sup>13</sup>C NMR spectrum of compound **45**.

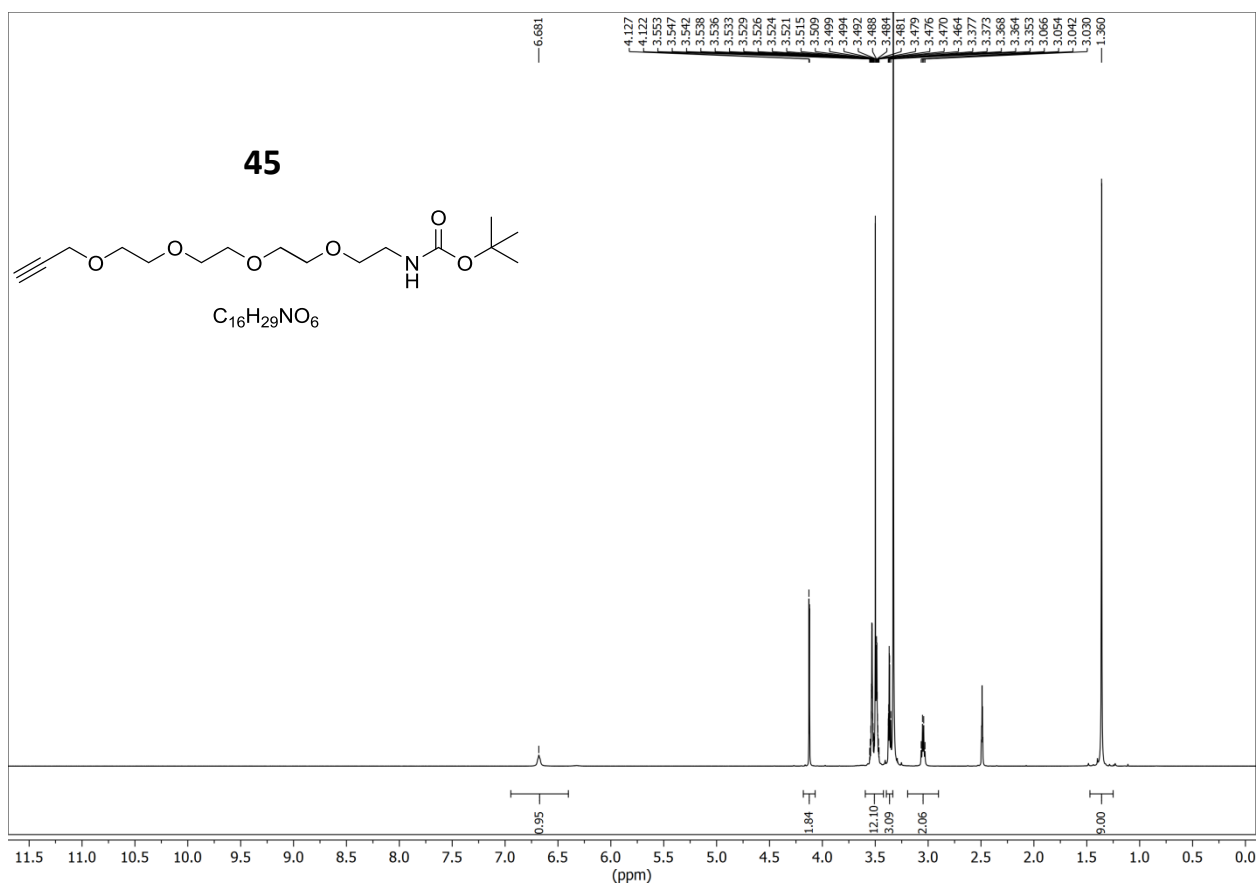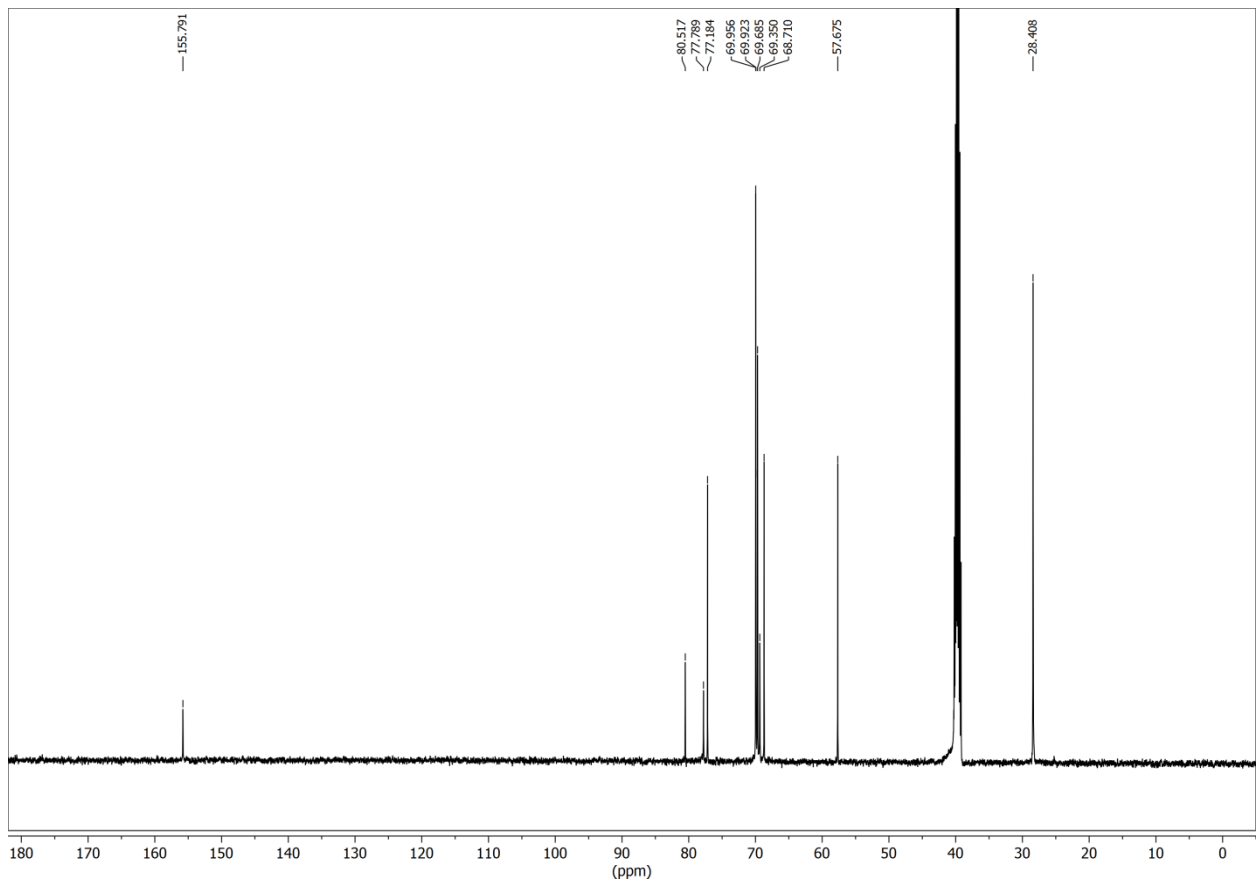

$^1\text{H}$  and  $^{13}\text{C}$  NMR spectrum of compound **3d**.

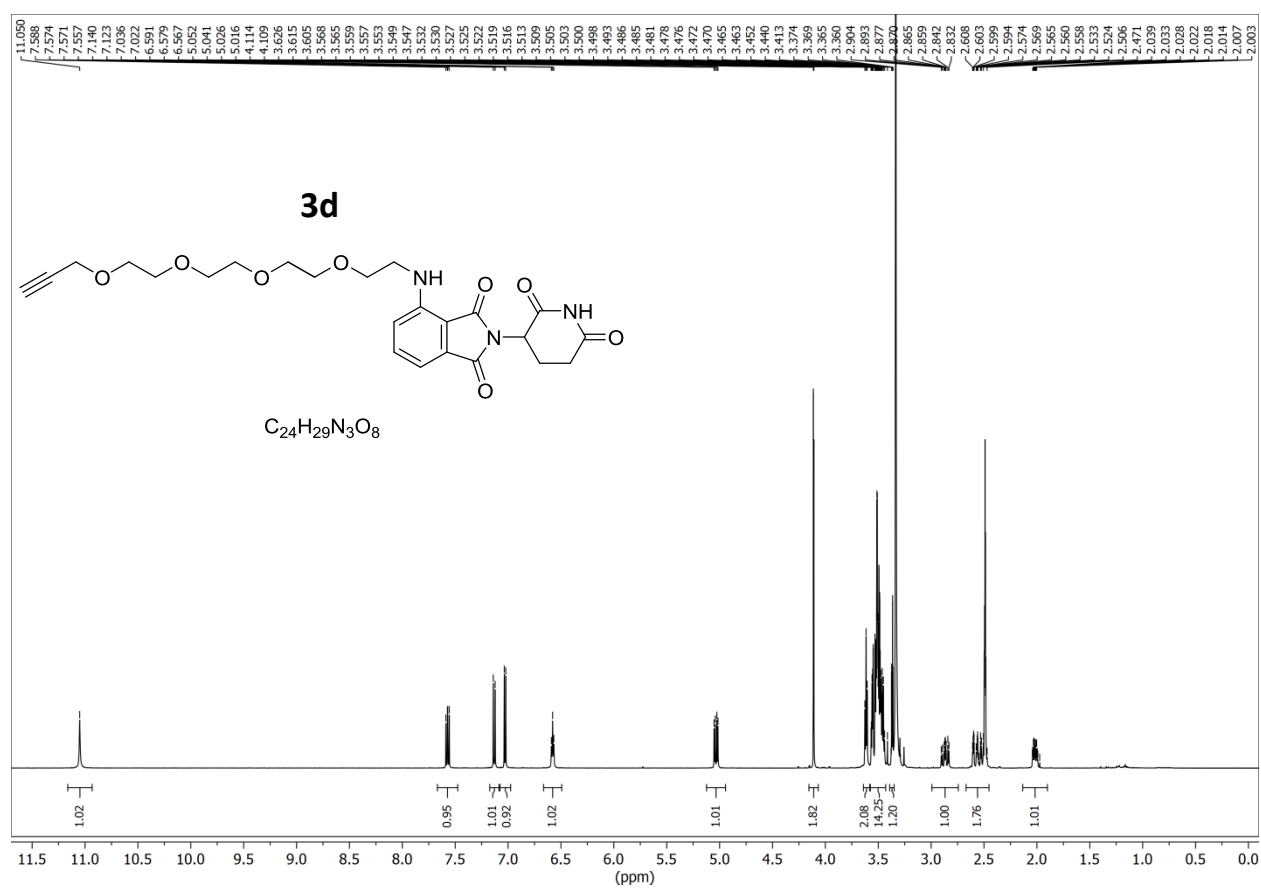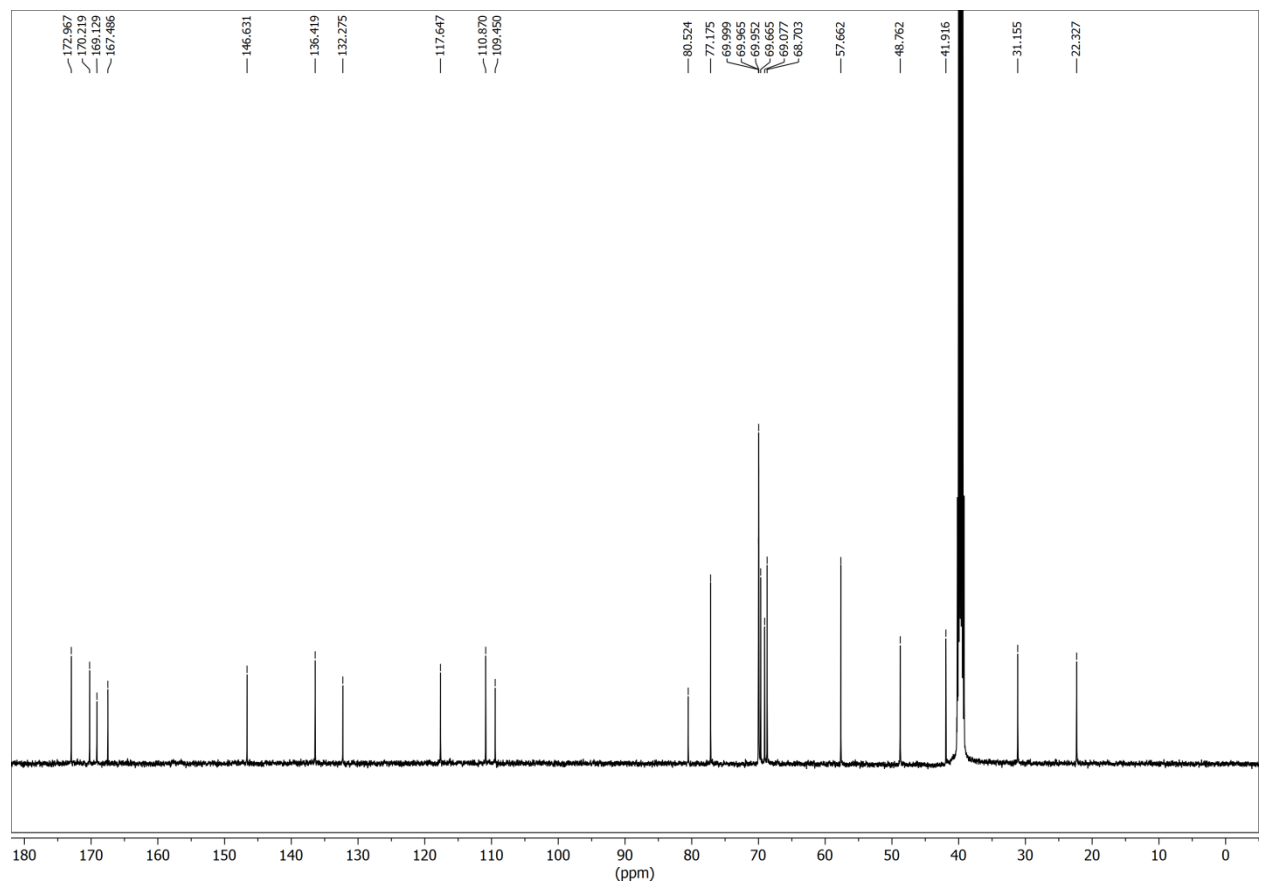

$^1\text{H}$  and  $^{13}\text{C}$  NMR spectrum of compound **48**.

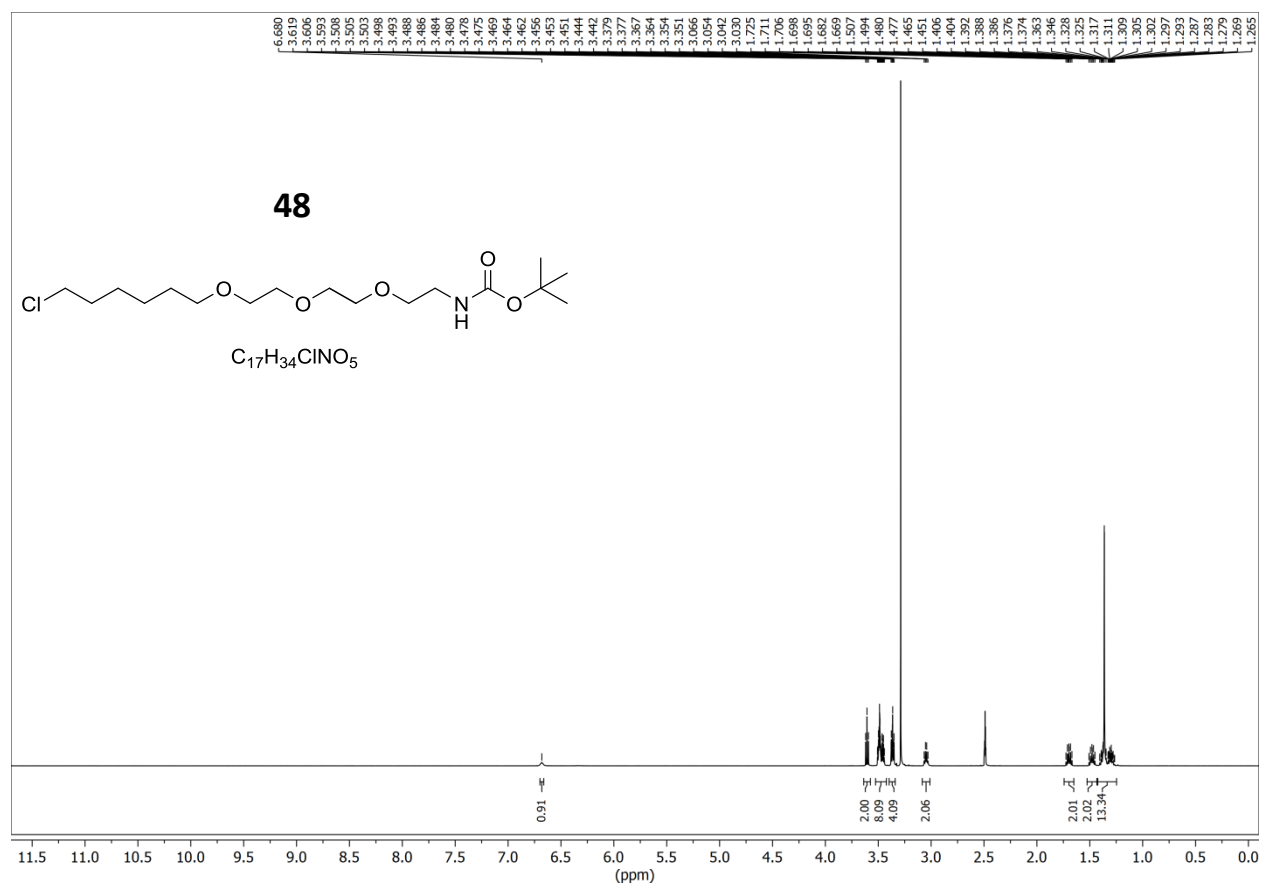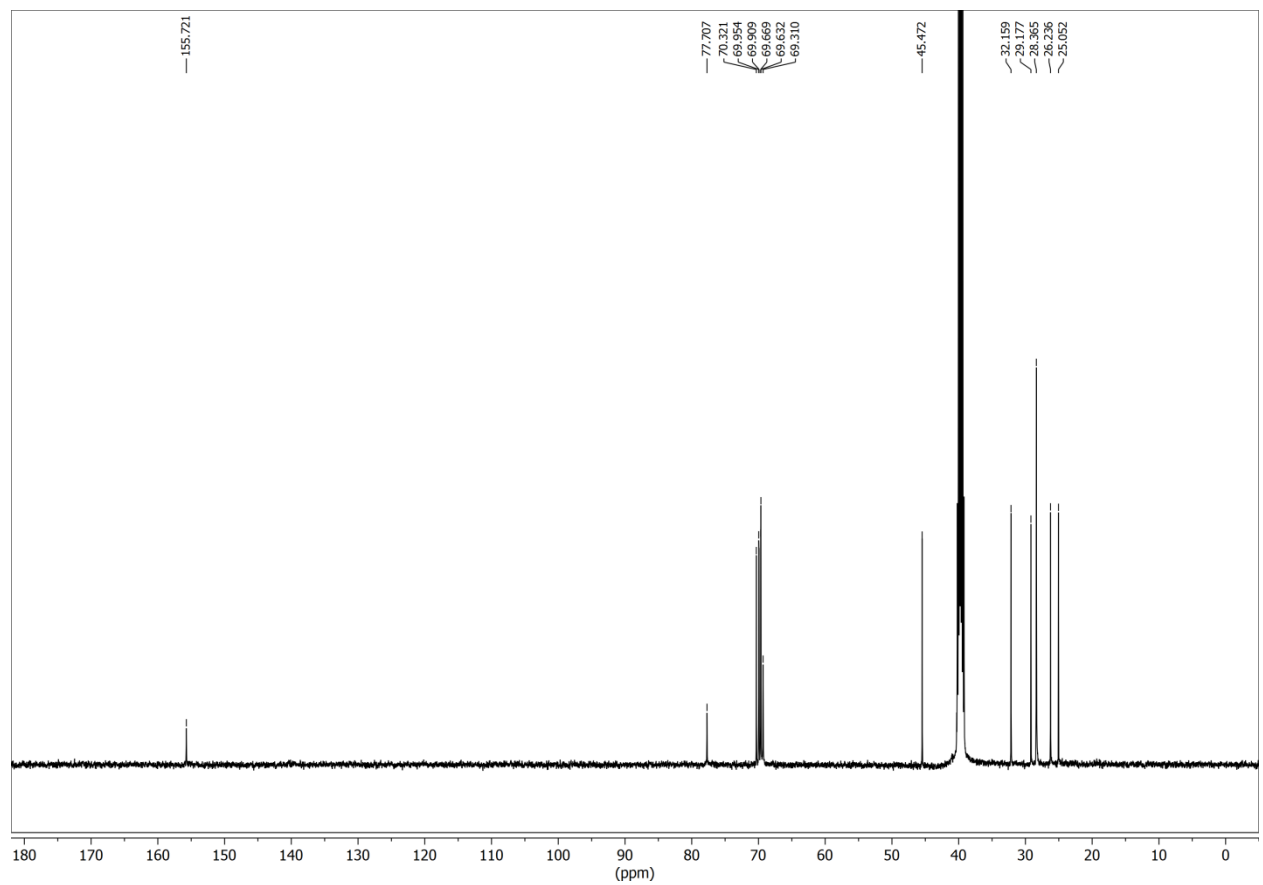

$^1\text{H}$  and  $^{13}\text{C}$  NMR spectrum of compound **4c**.

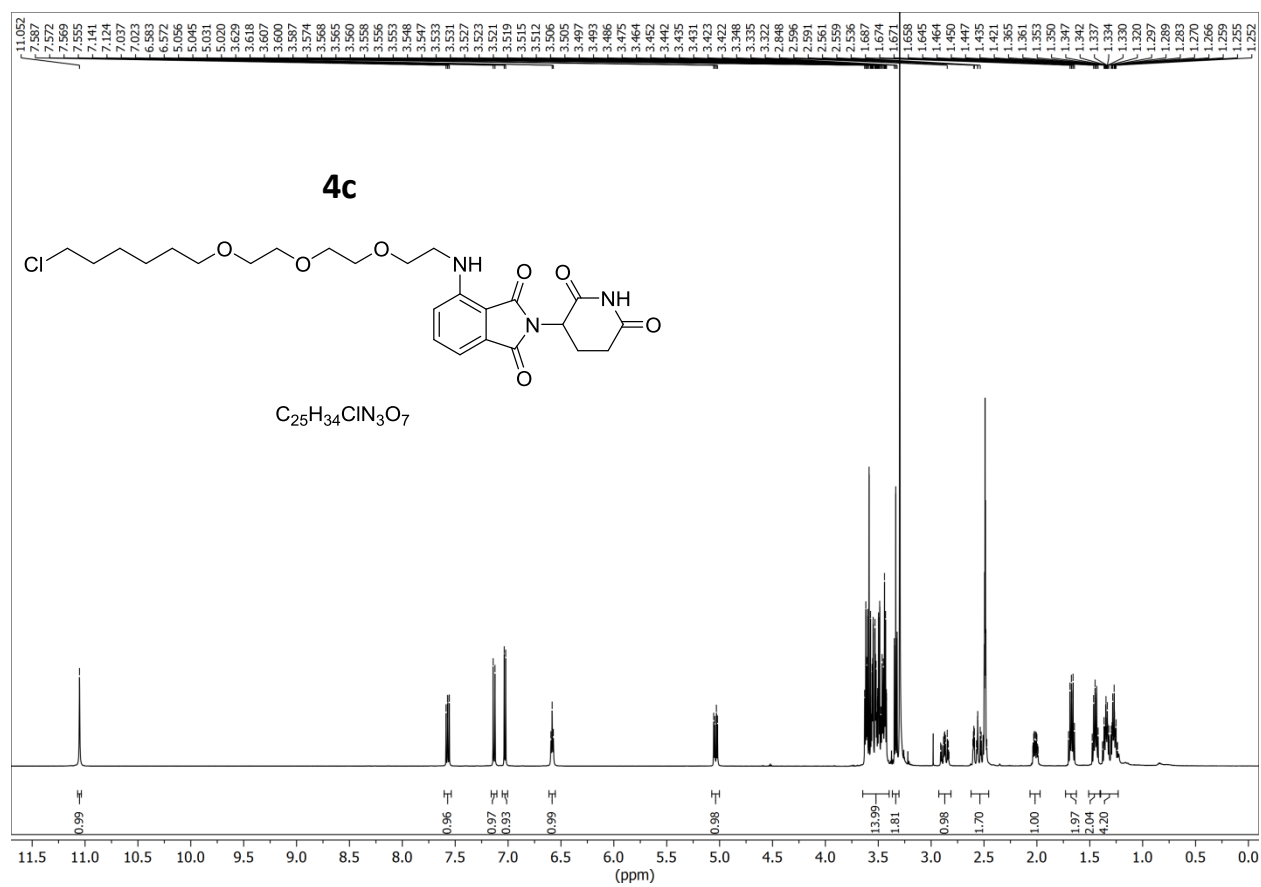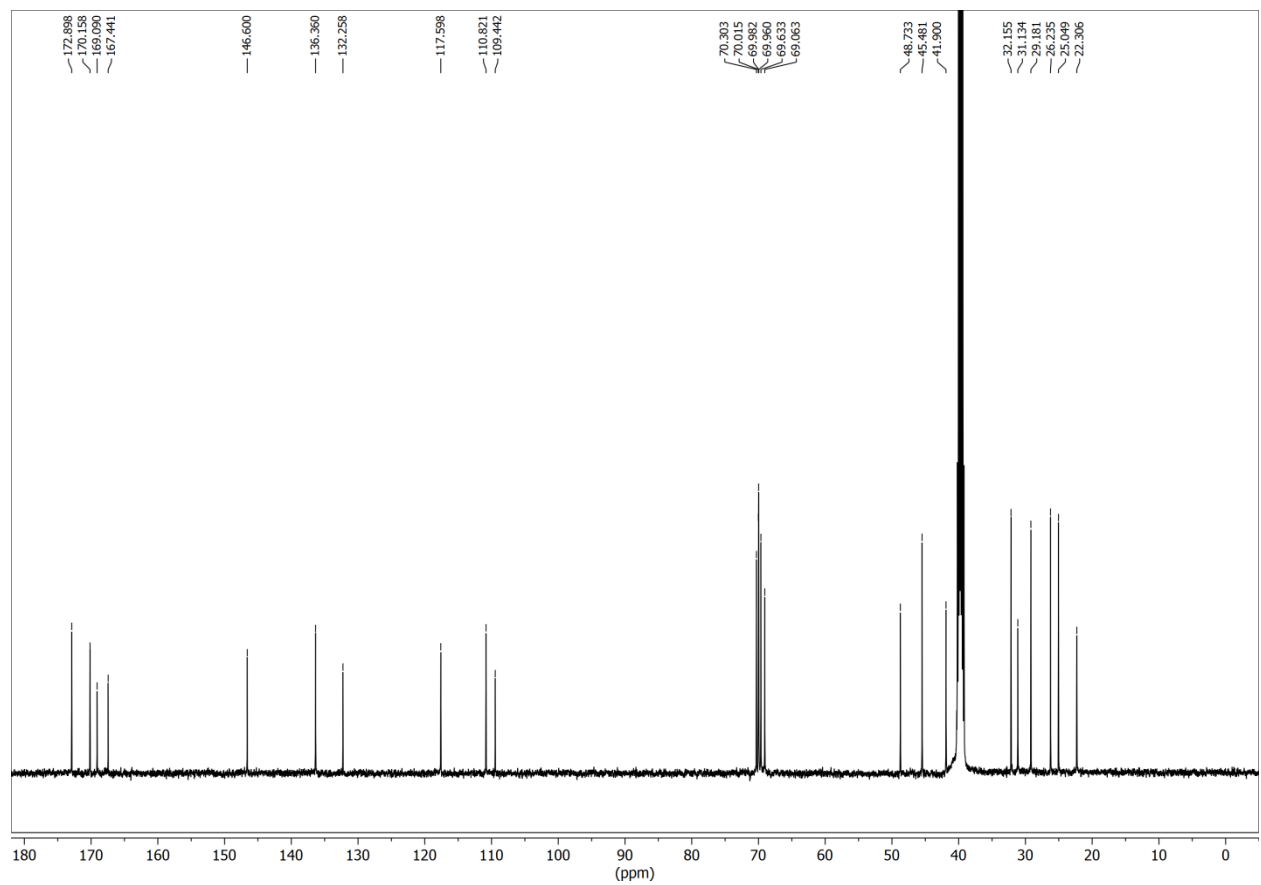



$^1\text{H}$  and  $^{13}\text{C}$  NMR spectrum of compound **59**.

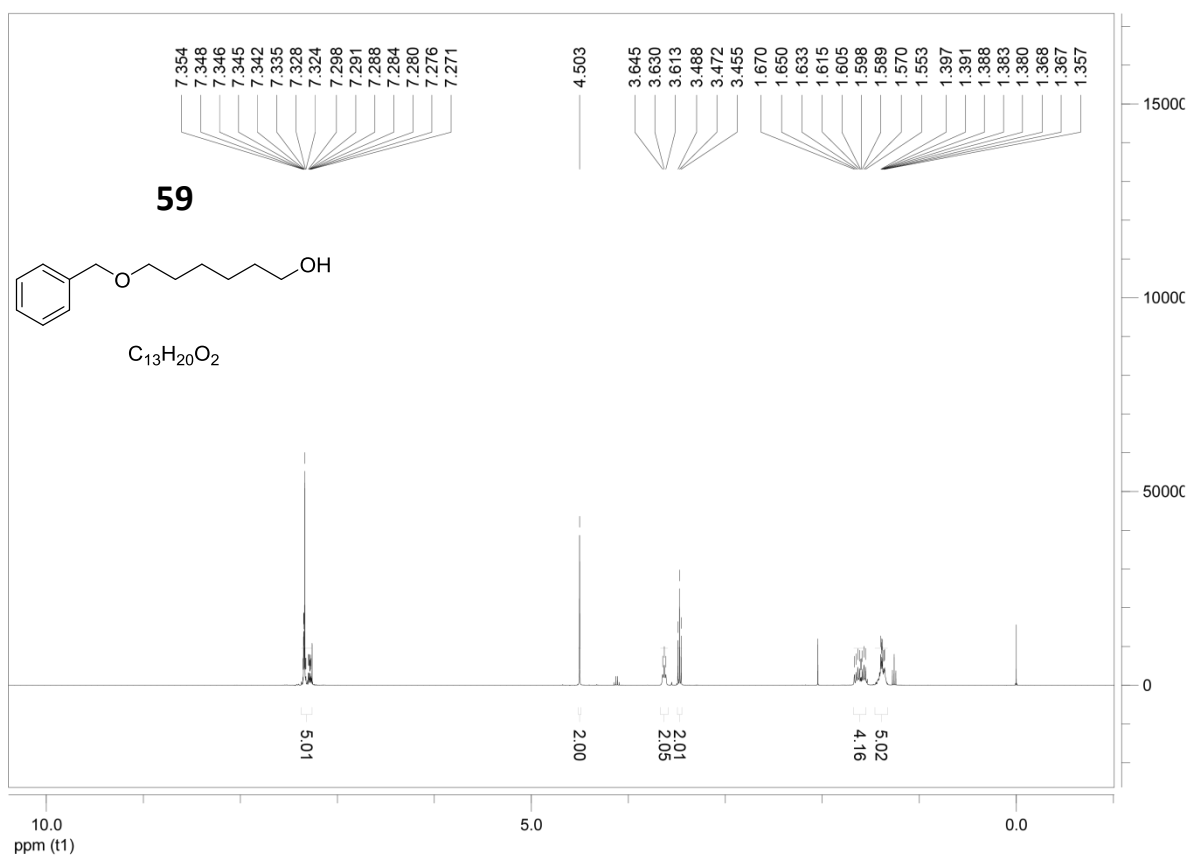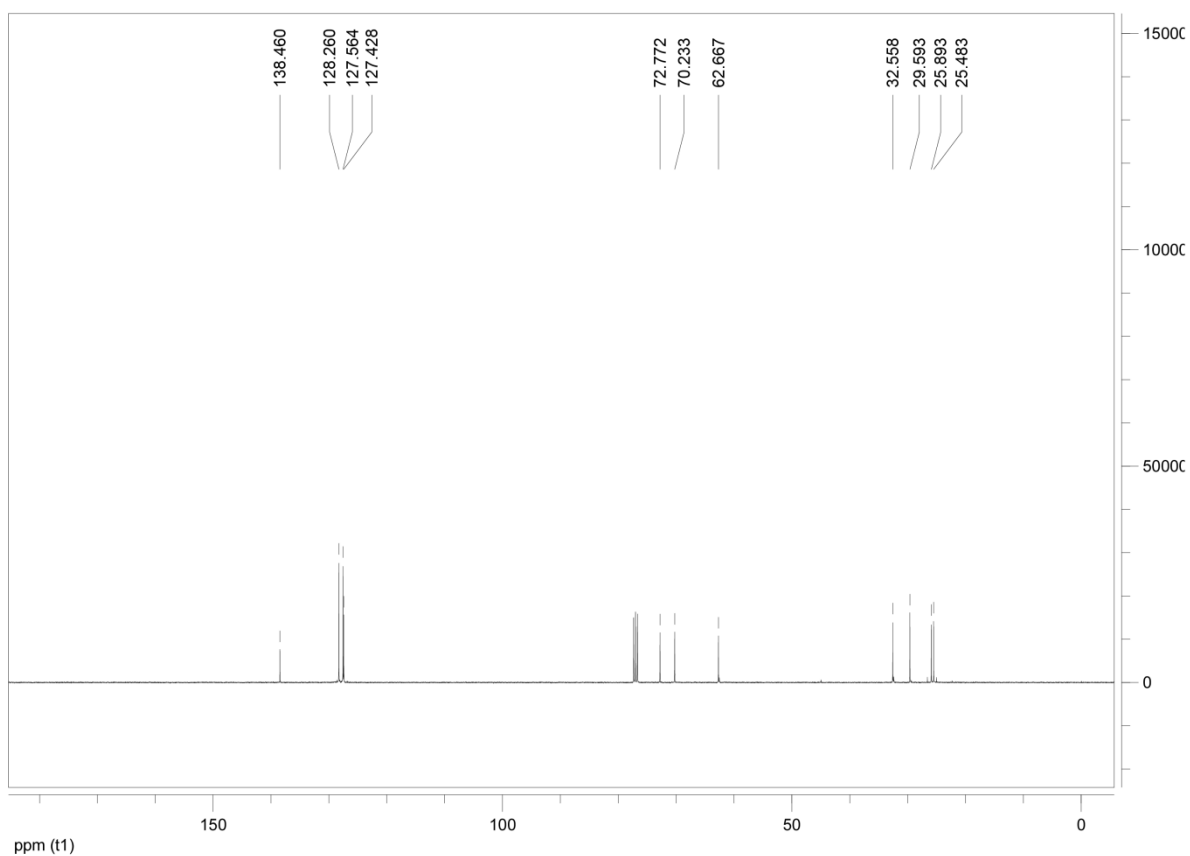

$^1\text{H}$  and  $^{13}\text{C}$  NMR spectrum of compound **60**.

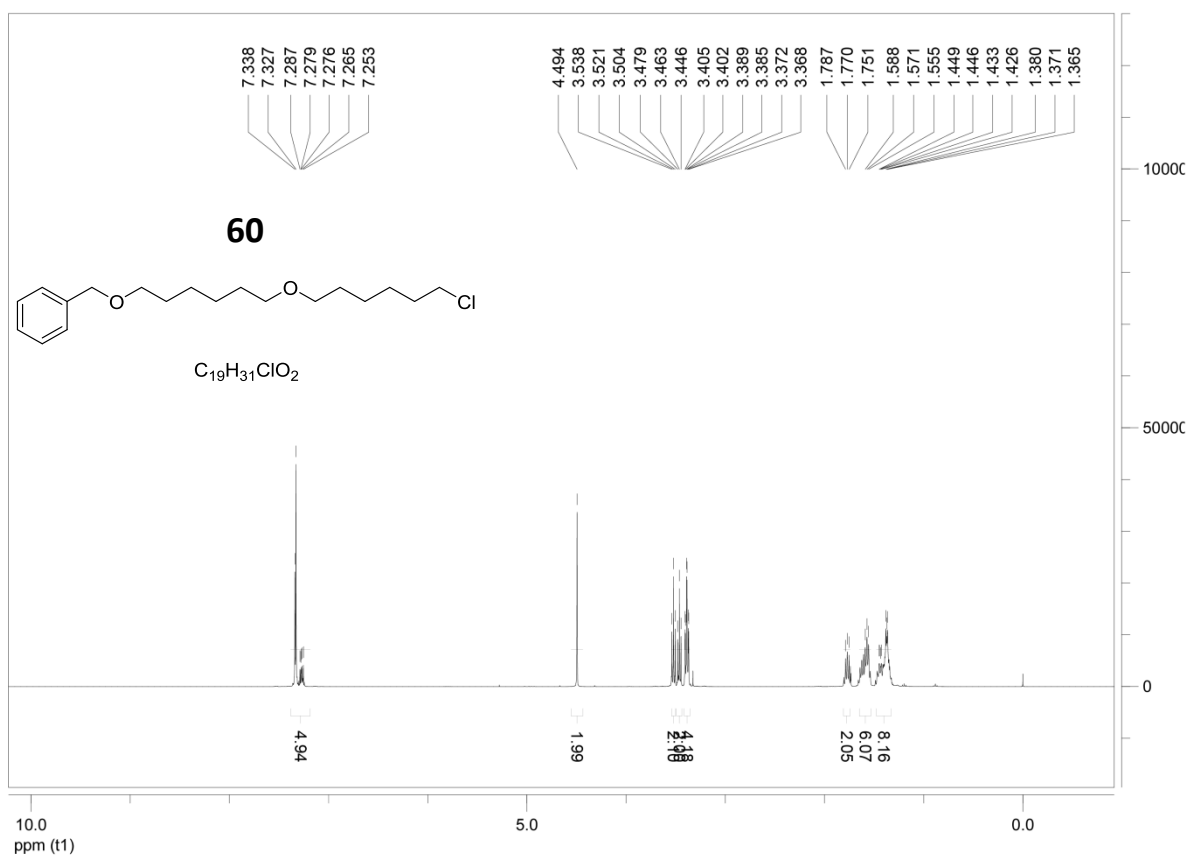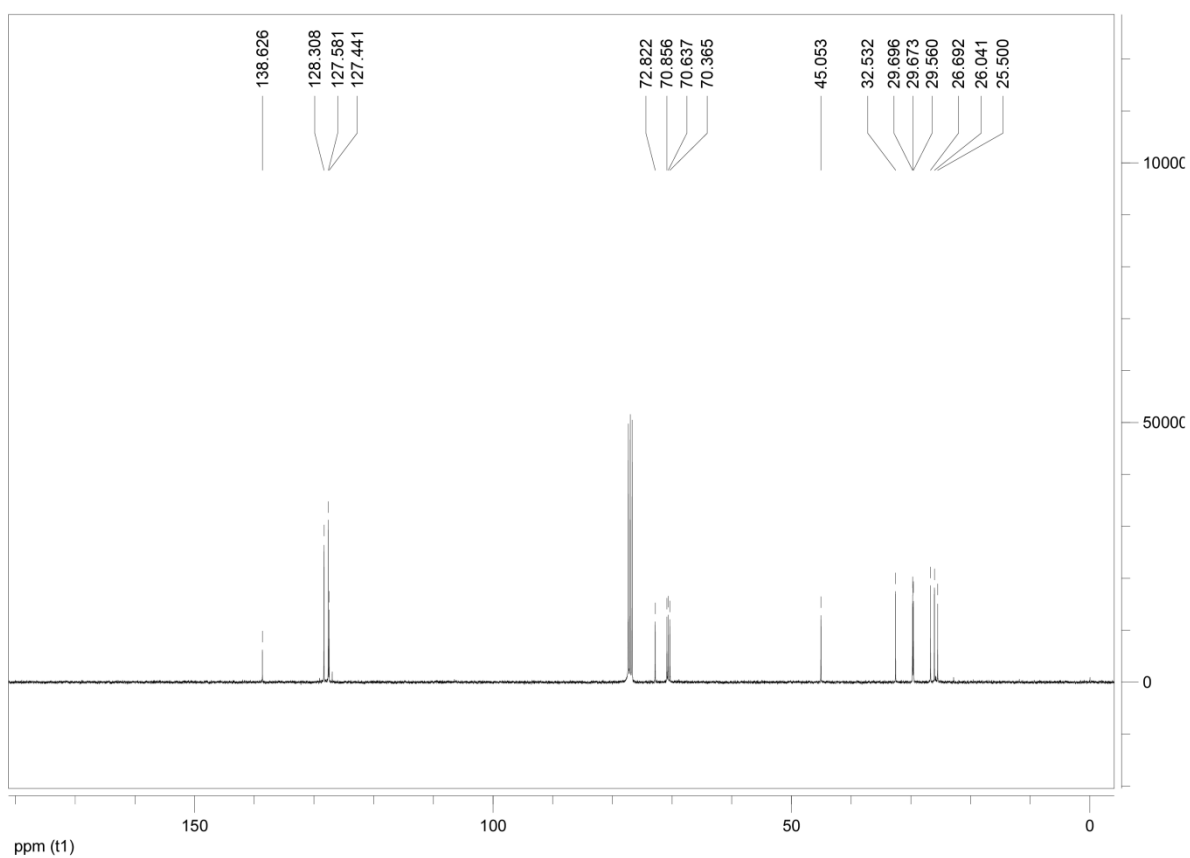

$^1\text{H}$  and  $^{13}\text{C}$  NMR spectrum of compound **61**.

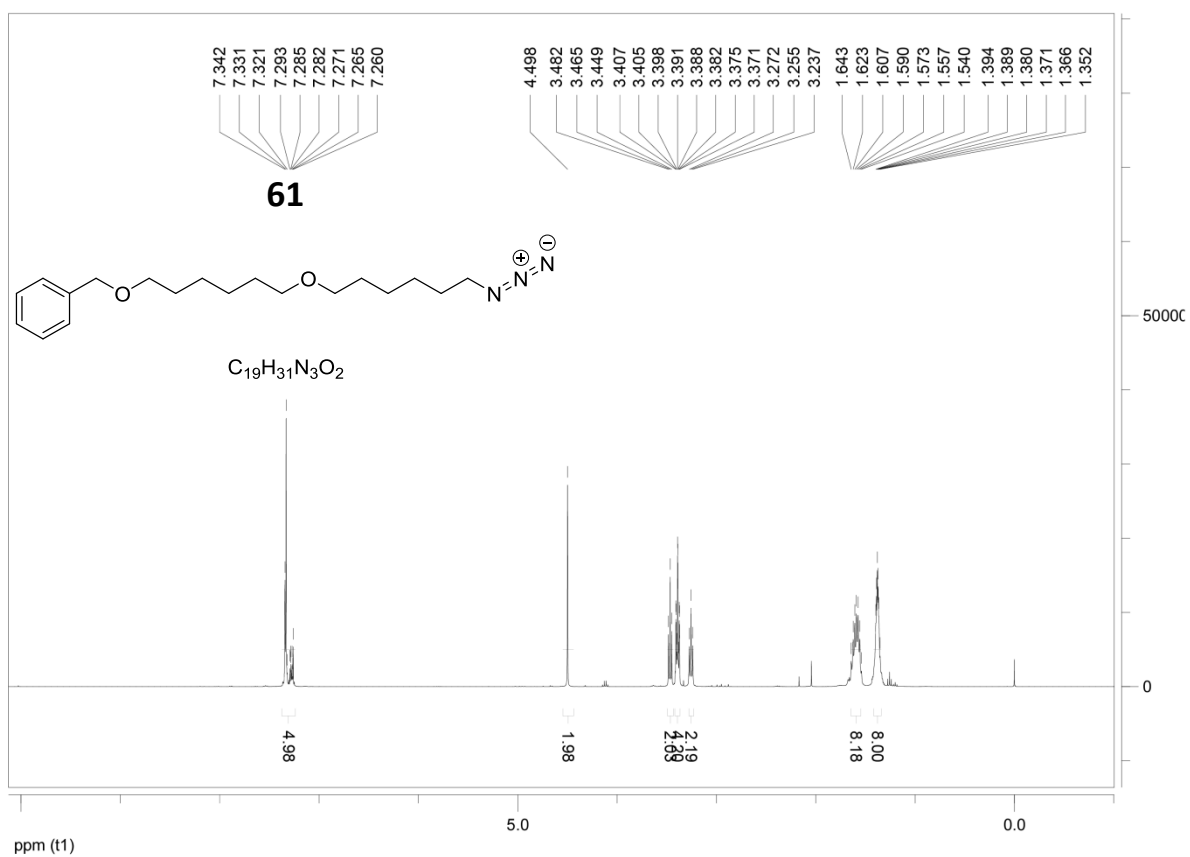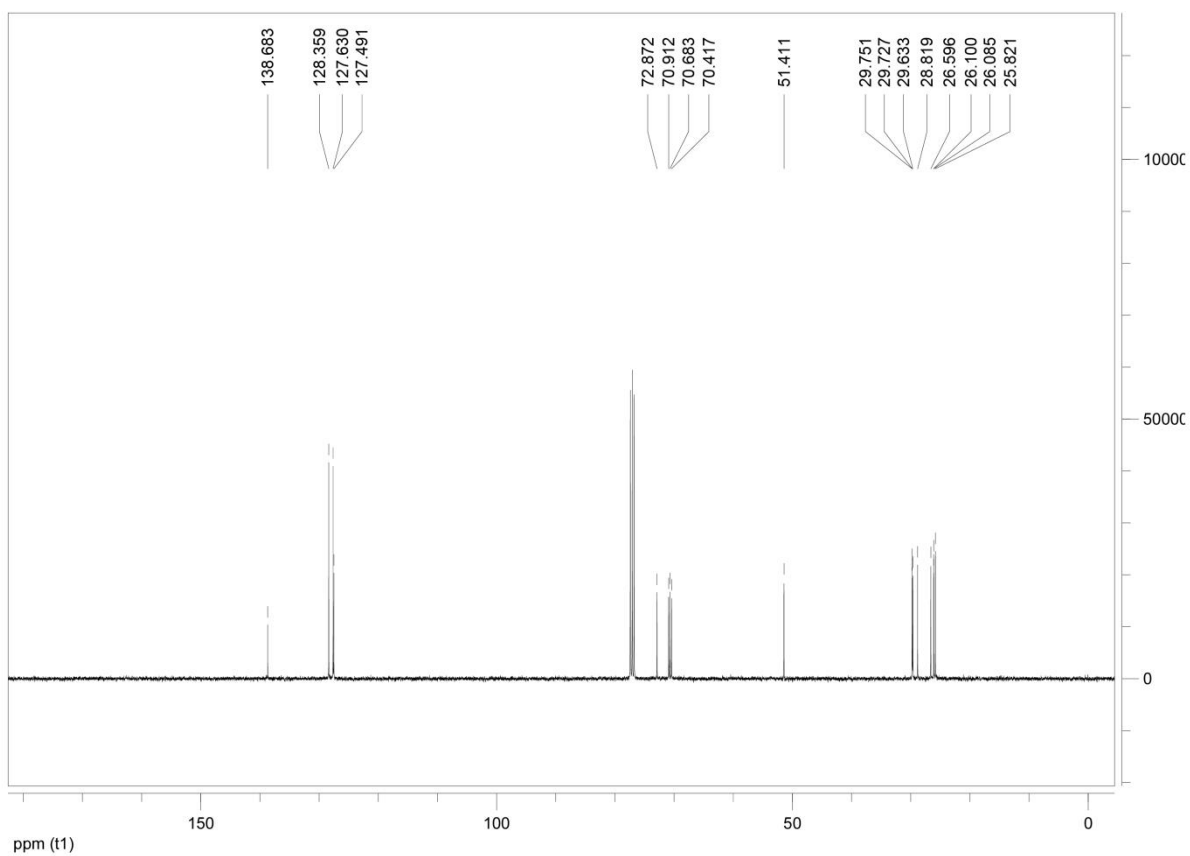

$^1\text{H}$  and  $^{13}\text{C}$  NMR spectrum of compound **62**.

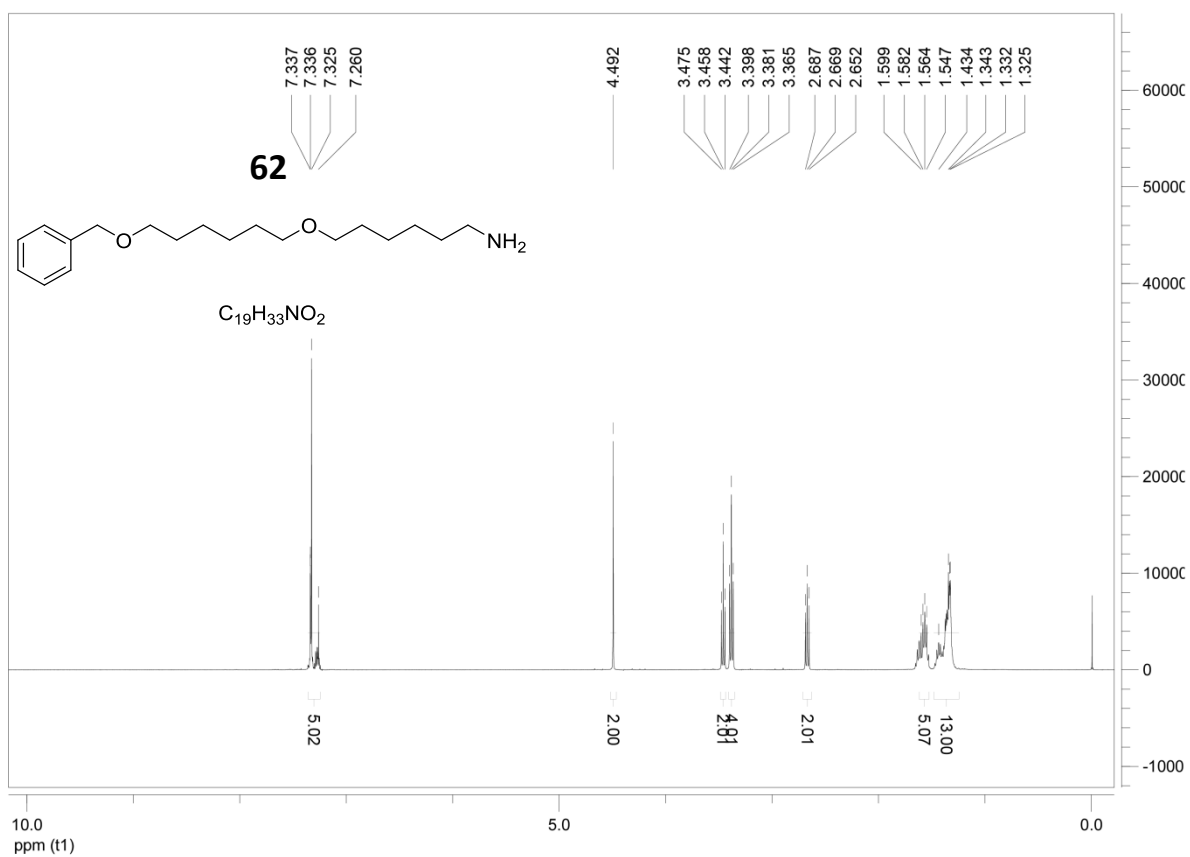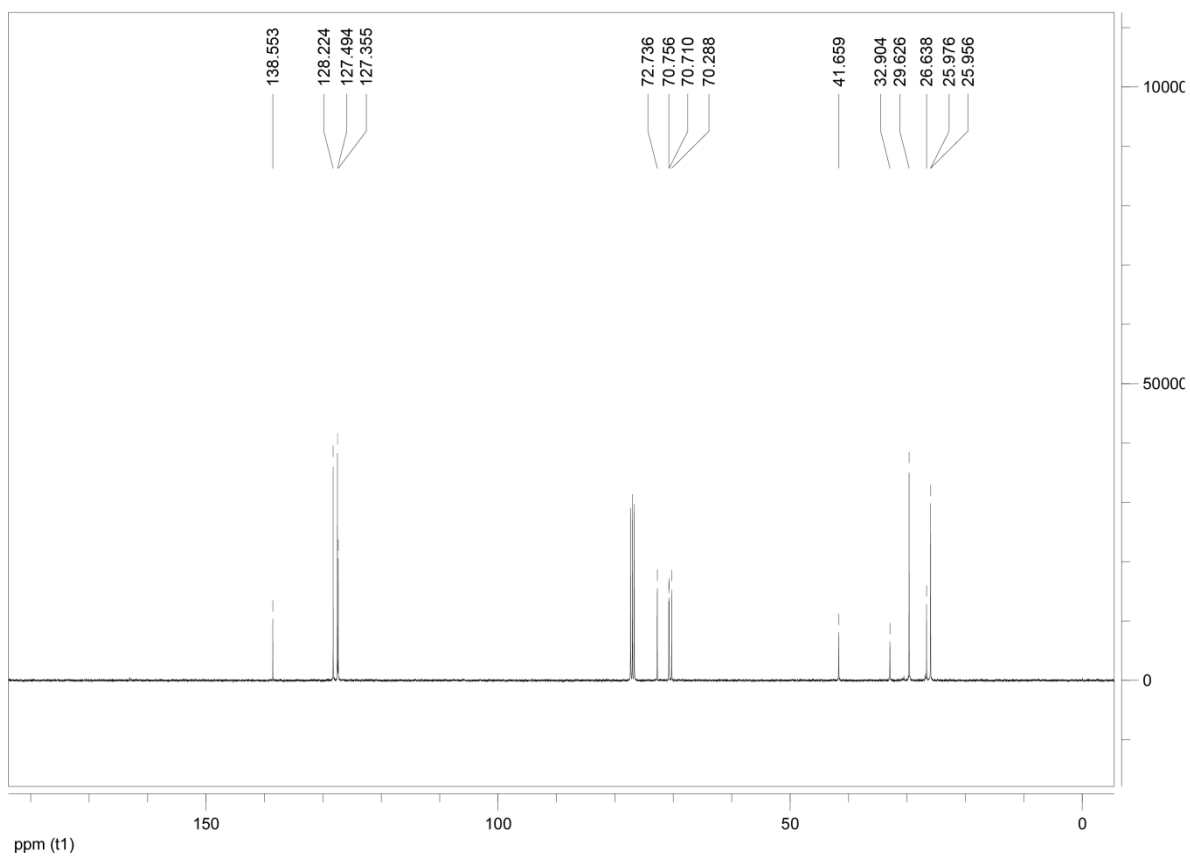

$^1\text{H}$  and  $^{13}\text{C}$  NMR spectrum of compound **5d**.

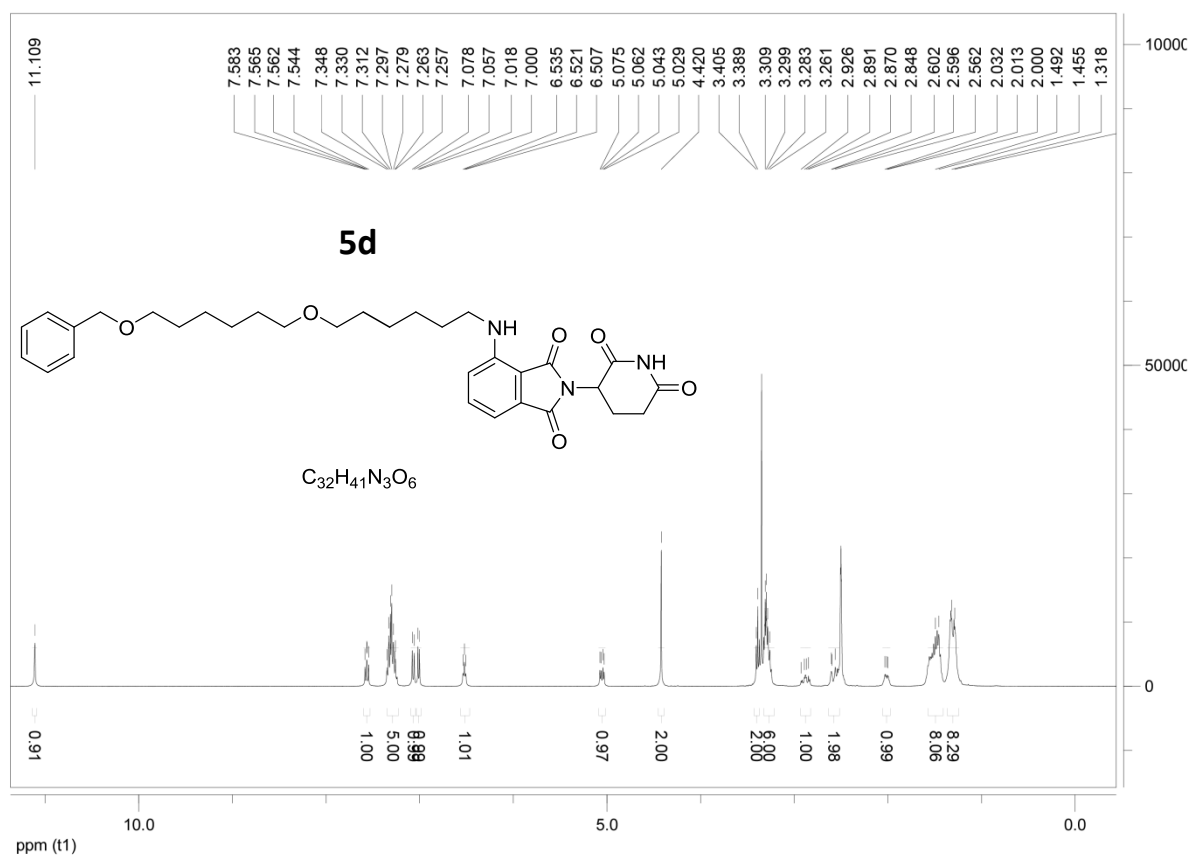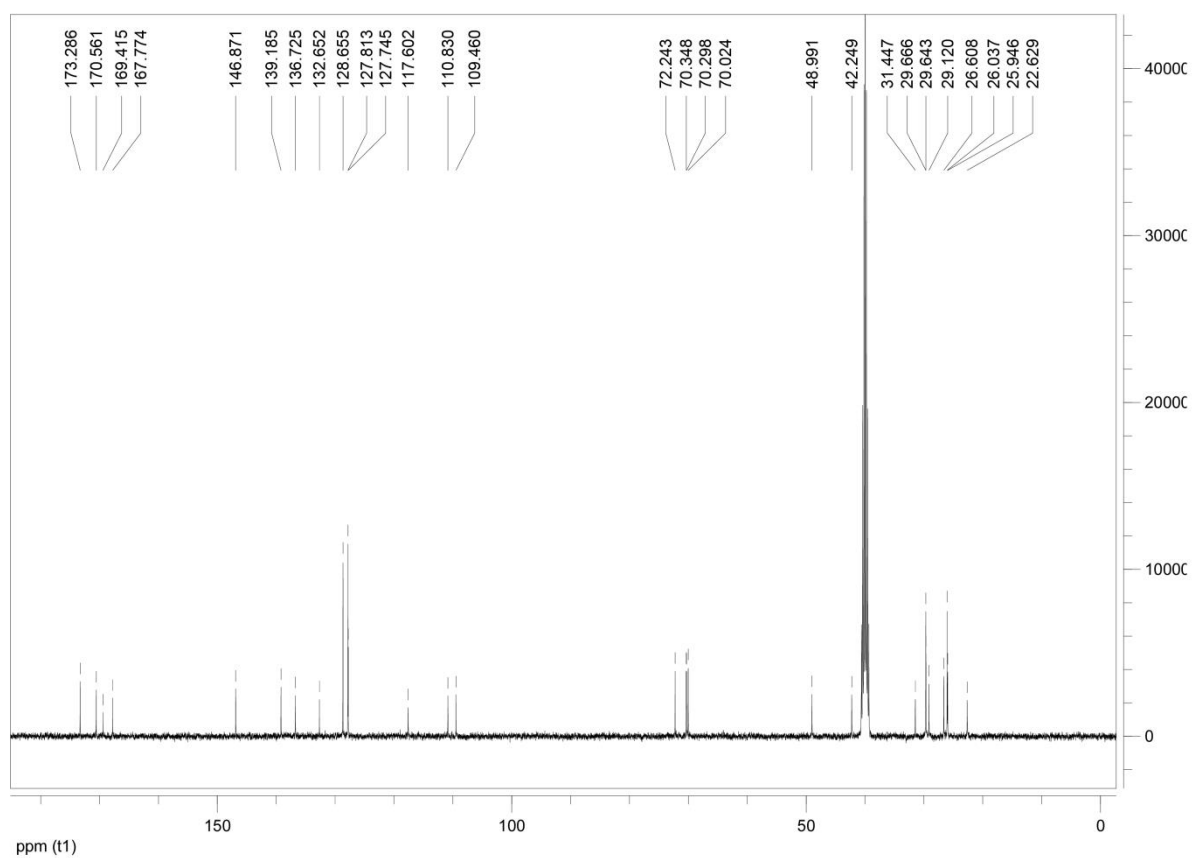

$^1\text{H}$  and  $^{13}\text{C}$  NMR spectrum of compound **8d**.

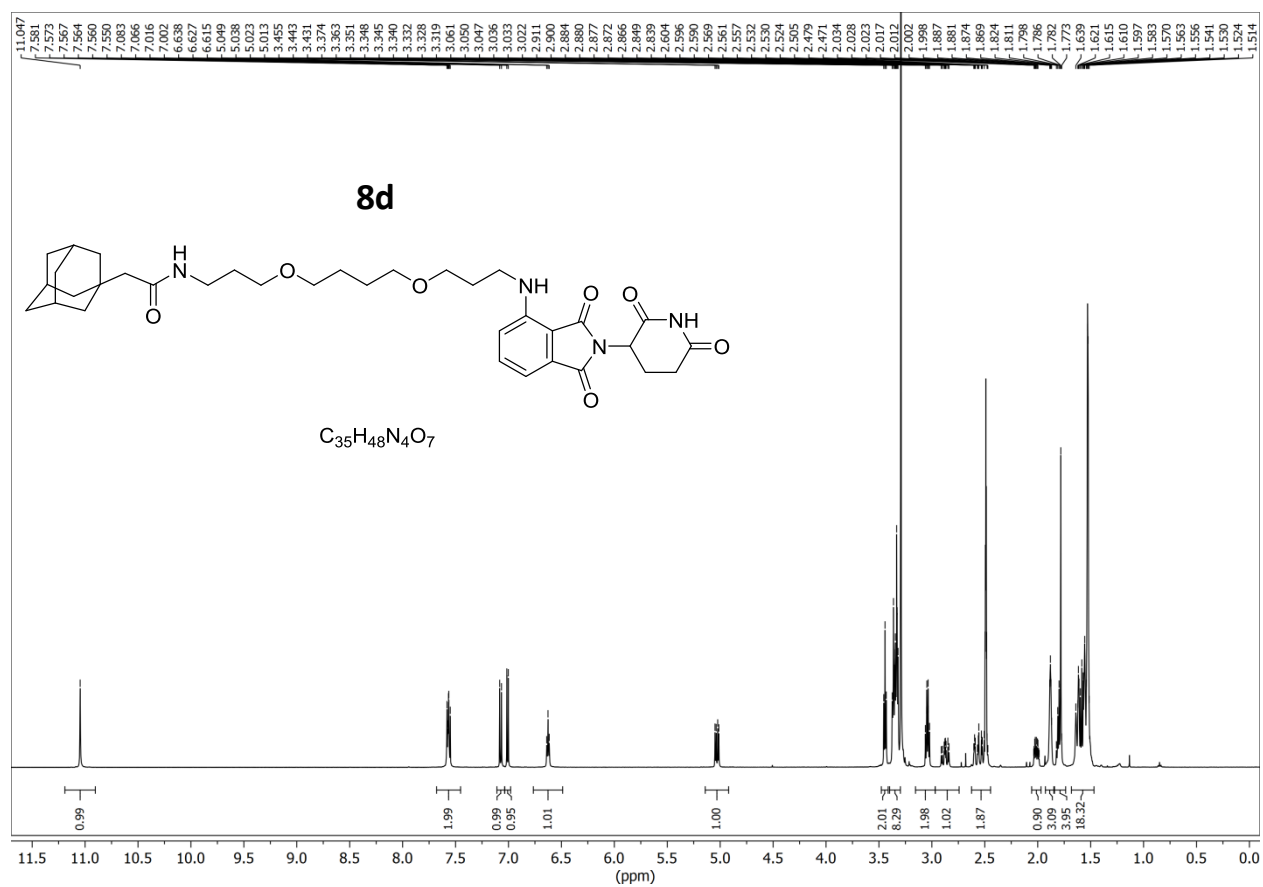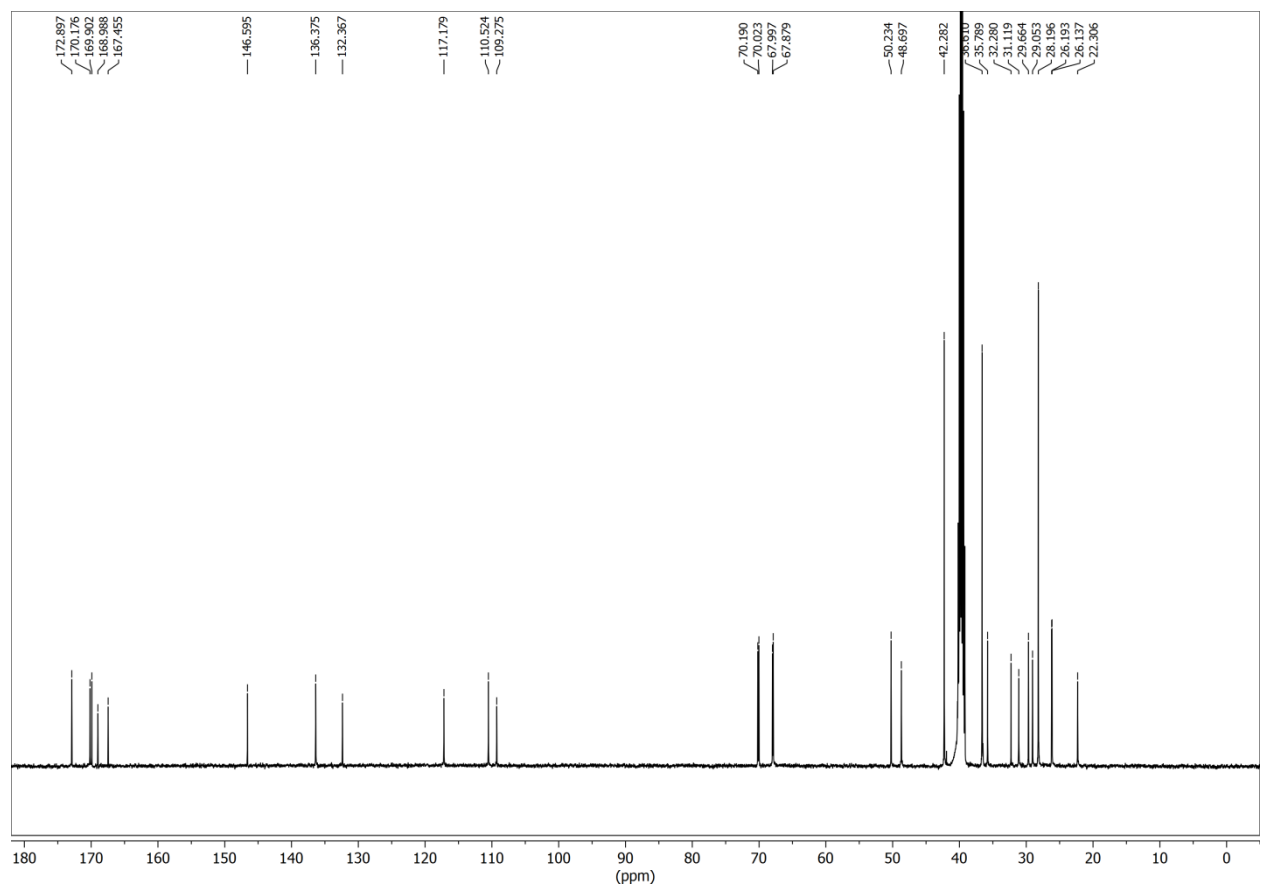

## References

1. C. Steinebach, H. Kehm, S. Lindner, L. Phuong Vu, S. Köpff, Á. López Mármol, C. Weiler, K. G. Wagner, M. Reichenzeller, J. Krönke and M. Gütschow, *Chem. Commun.*, 2019, **55**, 1821–1824.
2. We have also performed calculations for the logP value using the KNIME<sup>5</sup> implementation of RDKit.<sup>6</sup> However, significant deviations from experimentally determined values were found.
3. S. F. Donovan and M. C. Pescatore, *J. Chromatogr. A*, 2002, **952**, 47–61.
4. P. Ertl, B. Rohde and P. Selzer, *J. Med. Chem.*, 2000, **43**, 3714–3717.
5. M. R. Berthold, N. Cebron, F. Dill, T. R. Gabriel, T. Kötter, T. Meinl, P. Ohl, C. Sieb, K. Thiel and B. Wiswedel, KNIME: The Konstanz Information Miner. In *Studies in Classification, Data Analysis, and Knowledge Organization*; Preisach, C., Burkhart, H., Schmidt-Thieme, L., Decker, R., Eds.; Springer: Berlin, Germany, 2008, pp 319–326.
6. RDKit: Cheminformatics and Machine Learning Software, 2013, <http://www.rdkit.org>.
7. K. Suthagar, A. J. A. Watson, B. L. Wilkinson and A. J. Fairbanks, *Eur. J. Med. Chem.*, 2015, **102**, 153–166.
8. L. Lercher, J. F. McGouran, B. M. Kessler, C. J. Schofield and B. G. Davis, *Angew. Chem. Int. Ed.*, 2013, **52**, 10553–10558.
9. C. Steinebach, S. Lindner, N. D. Udeshi, D. C. Mani, H. Kehm, S. Köpff, S. A. Carr, M. Gütschow and J. Krönke, *ACS Chem. Biol.*, 2018, **13**, 2771–2782.
10. F. Kohl, J. Schmitz, N. Furtmann, A. C. Schulz-Fincke, M. D. Mertens, J. Küppers, M. Benkhoff, E. Tobiasch, U. Bartz, J. Bajorath, M. Stirnberg and M. Gütschow, *Org. Biomol. Chem.*, 2015, **13**, 10310–10323.
11. J. K. Pokorski, K. Breitenkamp, L. O. Liepold, S. Qazi and M. G. Finn, *J. Am. Chem. Soc.*, 2011, **133**, 9242–9245.
12. M. Ishoey, S. Chorn, N. Singh, M. G. Jaeger, M. Brand, J. Paulk, S. Bauer, M. A. Erb, K. Parapatics, A. C. Müller, K. L. Bennett, G. F. Ecker, J. E. Bradner and G. E. Winter, *ACS Chem. Biol.*, 2018, **13**, 553–560.
13. C. M. Olson, B. Jiang, M. A. Erb, Y. Liang, Z. M. Doctor, Z. Zhang, T. Zhang, N. Kwiatkowski, M. Boukhali, J. L. Green, W. Haas, T. Nomanbhoy, E. S. Fischer, R. A. Young, J. E. Bradner, G. E. Winter and N. S. Gray, *Nat. Chem. Biol.*, 2018, **14**, 163–170.
14. L. Bai, B. Zhou, C. Y. Yang, J. Ji, D. McEachern, S. Przybranowski, H. Jiang, J. Hu, F. Xu, Y. Zhao, L. Liu, E. Fernandez-Salas, J. Xu, Y. Dou, B. Wen, D. Sun, J. Meagher, J. Stuckey, D. F. Hayes, S. Li, M. J. Ellis and S. Wang, *Cancer Res.*, 2017, **77**, 2476–2487.
15. F. Liu, H. Zha and Z. Yao, *J. Org. Chem.*, 2003, **68**, 6679–6684.
16. S. Dey and A. Sudalai, *Tetrahedron-Asymmetry*, 2015, **26**, 344–349.
